# Supplementary material for: Scaffold hopping from indoles to indazoles yields dual MCL-1/BCL-2 inhibitors from MCL-1 selective leads
Source: Royal Society of Chemistry journal article supplement (doi:10.1039/d2md00095d), 2022-01-01

BD-4-170-1H

Sample Name:

Data Collected on:

400mr-vnmrs400

Archive directory:

Sample directory:

FidFile: PROTON

Pulse Sequence: PROTON (s2pul)

Solvent: dmsc

Data collected on: Sep 8 2019

Temp. 22.0 C / 295.1 K

Operator: work

Relax. delay 5.000 sec

Pulse 119.1 degrees

Acq. time 1.278 sec

Width 6410.3 Hz

12 repetitions

OBSERVE H1, 399.7525233 MHz

DATA PROCESSING

Line broadening 0.5 Hz

FT size 16384

Total time 3 min 21 sec

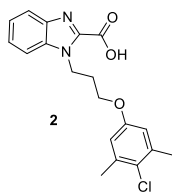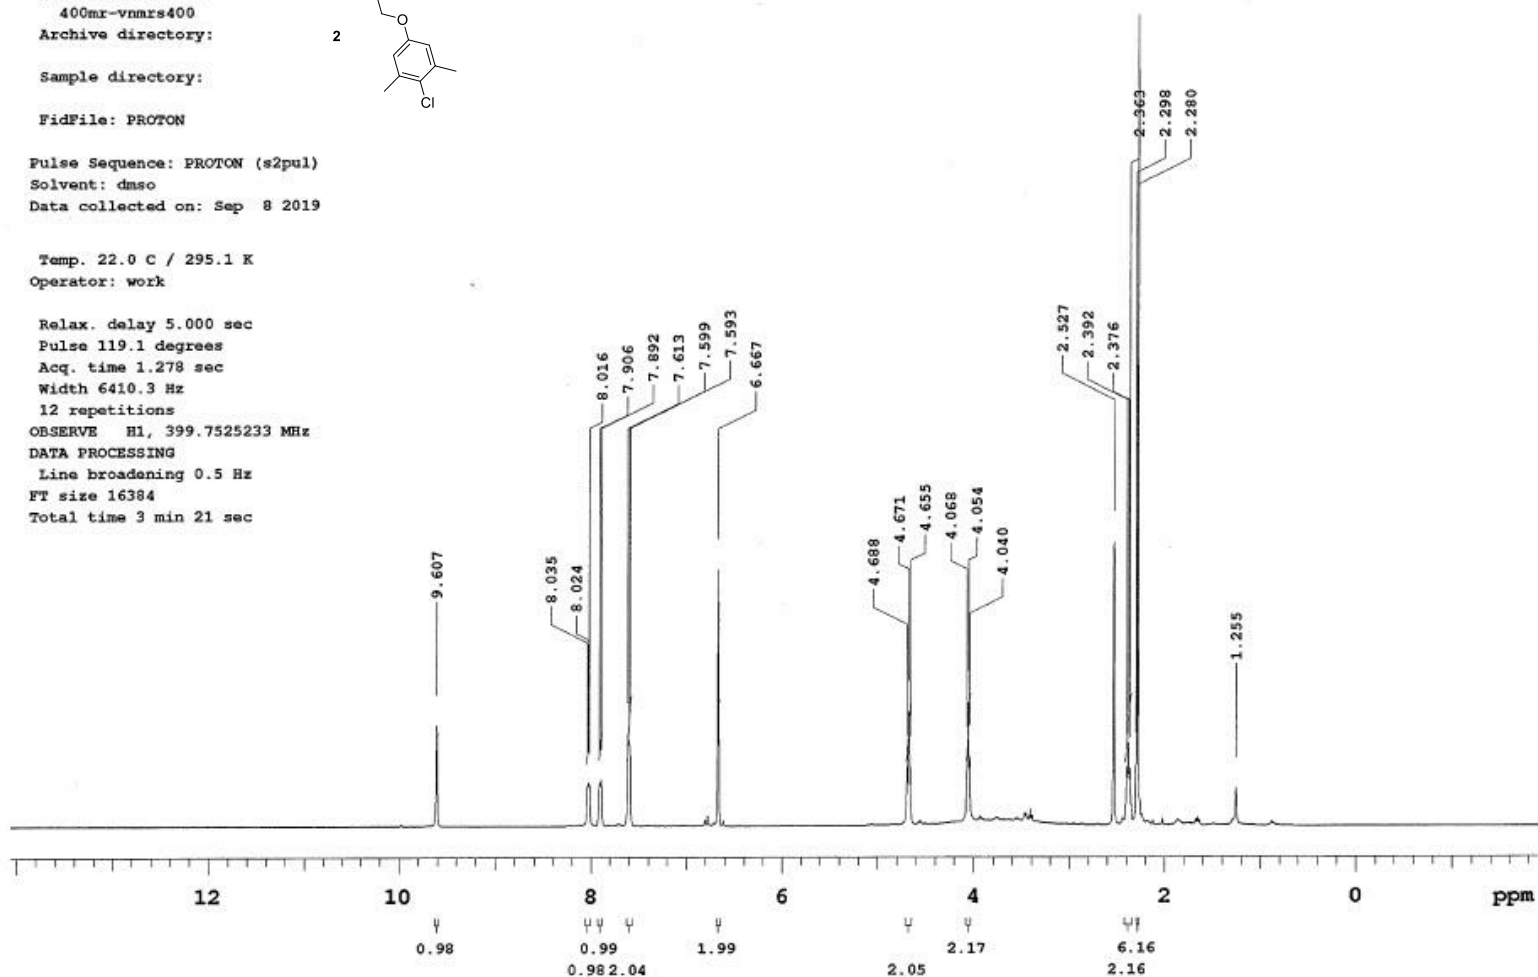

BD-4-170-13C

Sample Name:

Data Collected on:

400mr-vnmrs400

Archive directory:

Sample directory:

FidFile: CARBON

Pulse Sequence: CARBON (s2pul)

Solvent: cdcl3

Data collected on: Sep 19 2019

Temp. 22.0 C / 295.1 K

Operator: work

Relax. delay 1.000 sec

Pulse 87.1 degrees

Acq. time 0.813 sec

Width 21186.4 Hz

132 repetitions

OBSERVE c13, 100.5173790 MHz

DECOUPLE h1, 399.7526411 MHz

Power 42 dB

continuously on

WALTZ-16 modulated

DATA PROCESSING

Line broadening 3.0 Hz

FT size 32768

Total time 30 min

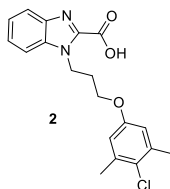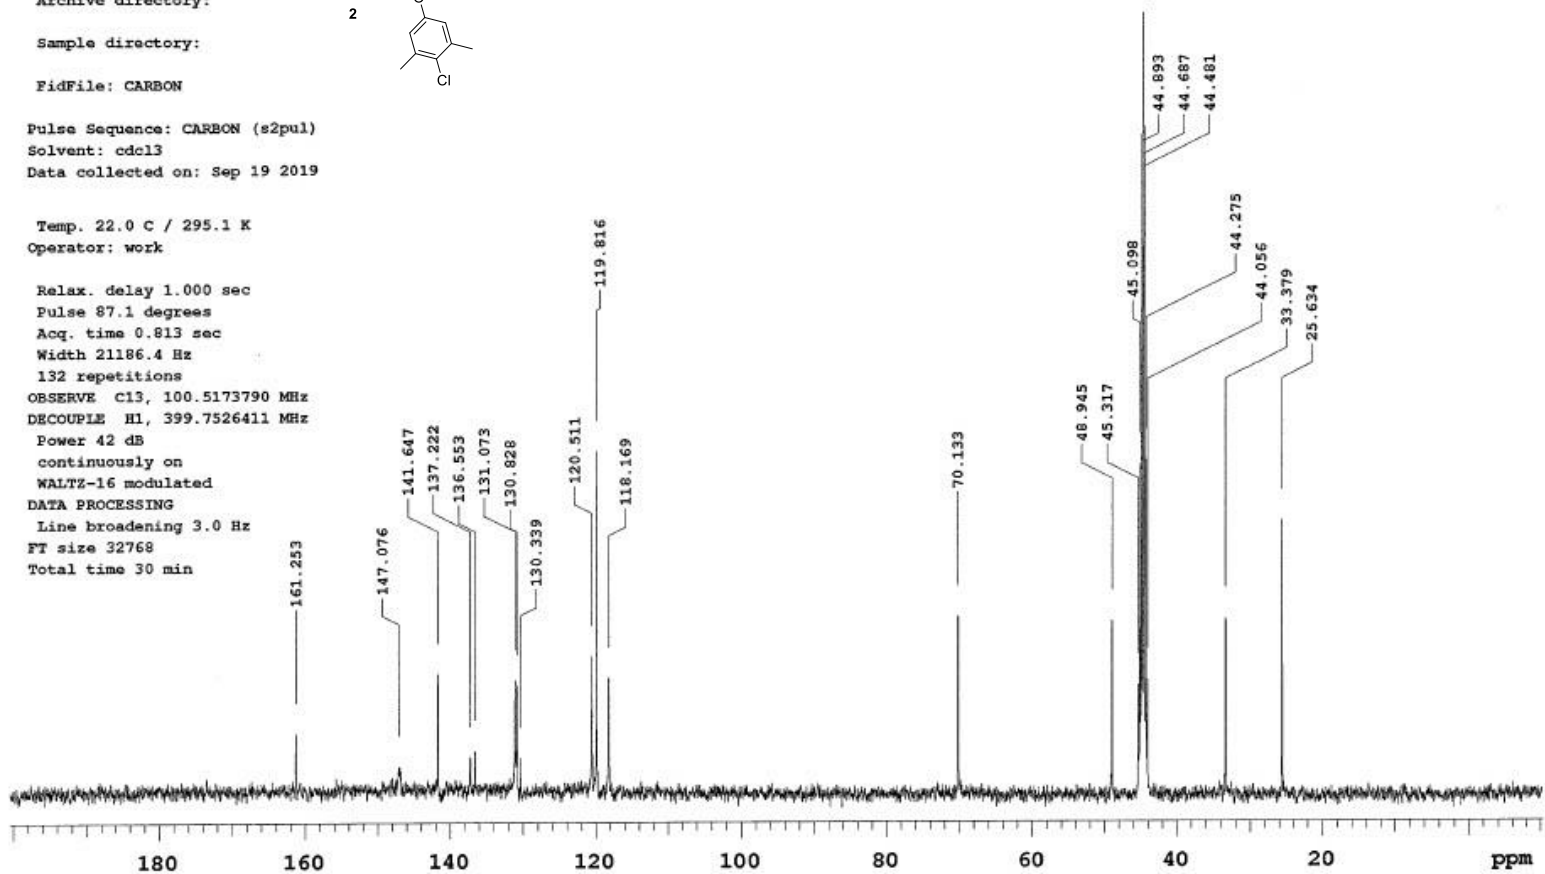

BD-4-184-1H

Sample Name:

Data Collected on:

400mr-vnmrs400

Archive directory:

Sample directory:

FidFile: PROTON

Pulse Sequence: PROTON (s2pul)

Solvent: dmsc

Data collected on: Feb 24 2022

Temp. 25.0 C / 298.1 K

Operator: work

Relax. delay 5.000 sec

Pulse 92.6 degrees

Acq. time 1.278 sec

Width 6410.3 Hz

16 repetitions

OBSERVE H1, 399.7525412 MHz

DATA PROCESSING

Line broadening 0.5 Hz

FT size 16384

Total time 3 min 21 sec

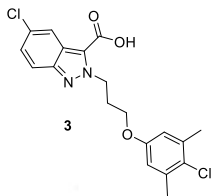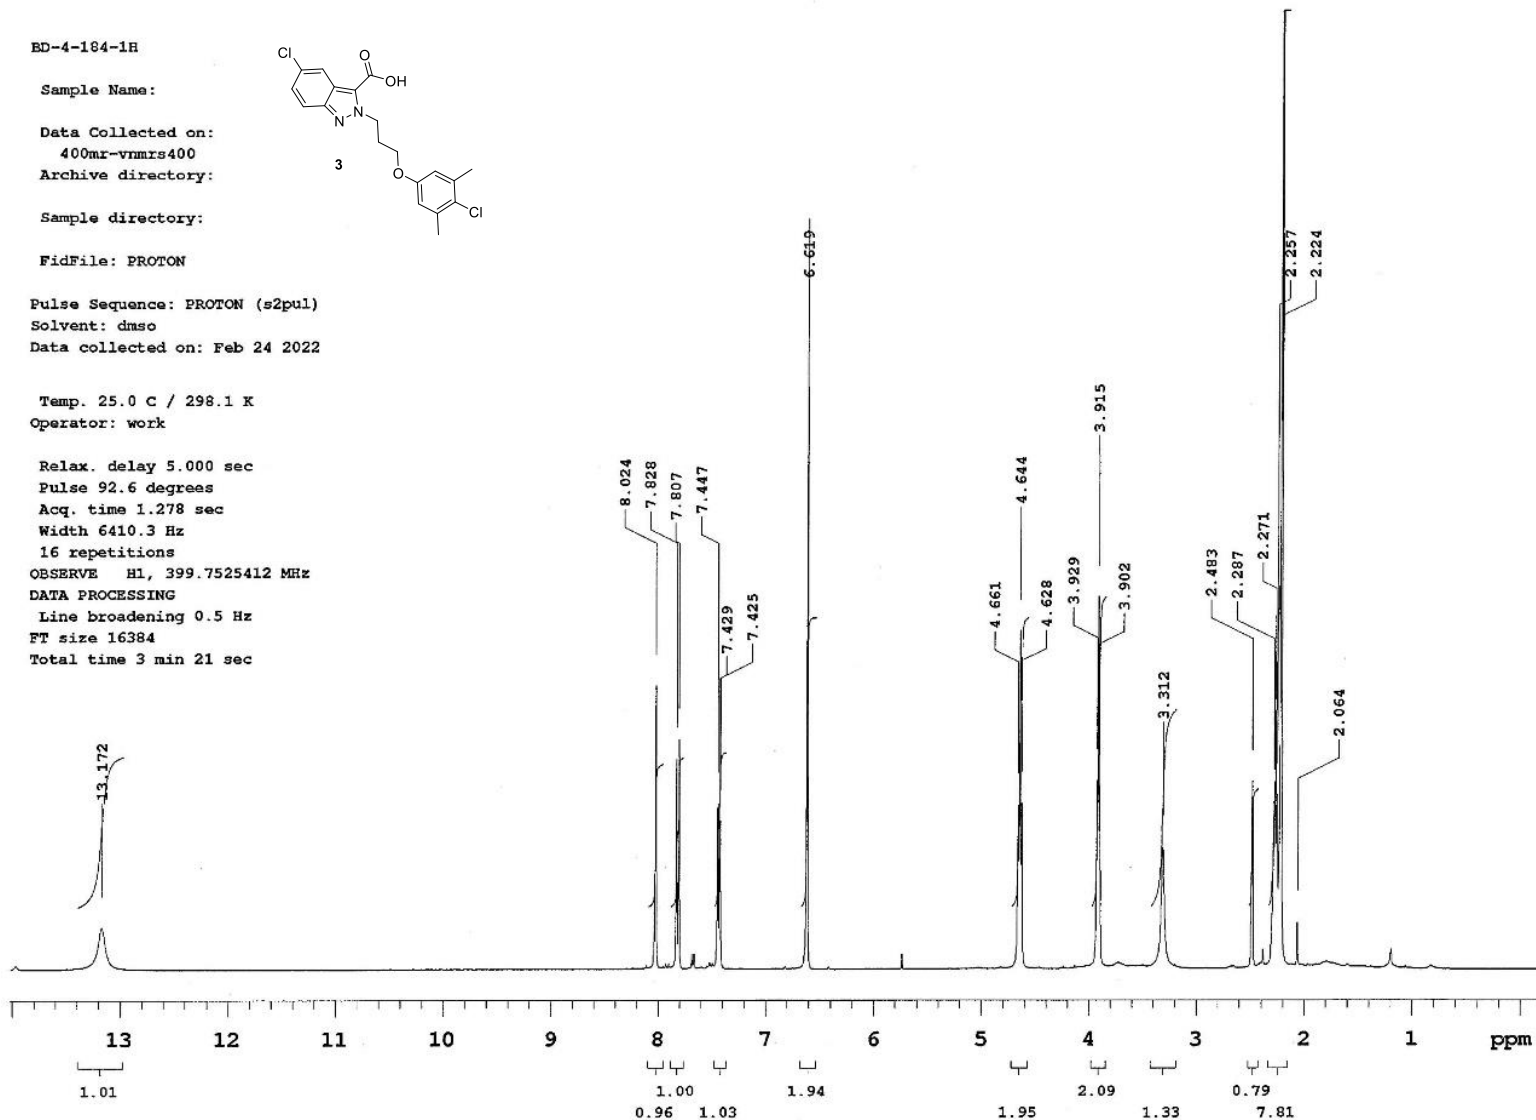

BD-4-184-C13

Sample Name:

Data Collected on:

400mr-vnmrs400

Archive directory:

Sample directory:

FidFile: CARBON

Pulse Sequence: CARBON (s2pul)

Solvent: DMSO

Data collected on: Feb 24 2022

Temp. 25.0 C / 298.1 K

Operator: work

Relax. delay 1.000 sec

Pulse 67.7 degrees

Acq. time 0.813 sec

Width 21186.4 Hz

296 repetitions

OBSERVE c13, 100.5179032 MHz

DECOUPLE H1, 399.7545399 MHz

Power 39 dB

continuously on

WALTZ-16 modulated

DATA PROCESSING

Line broadening 3.0 Hz

FT size 32768

Total time 30 min

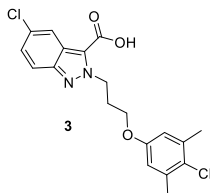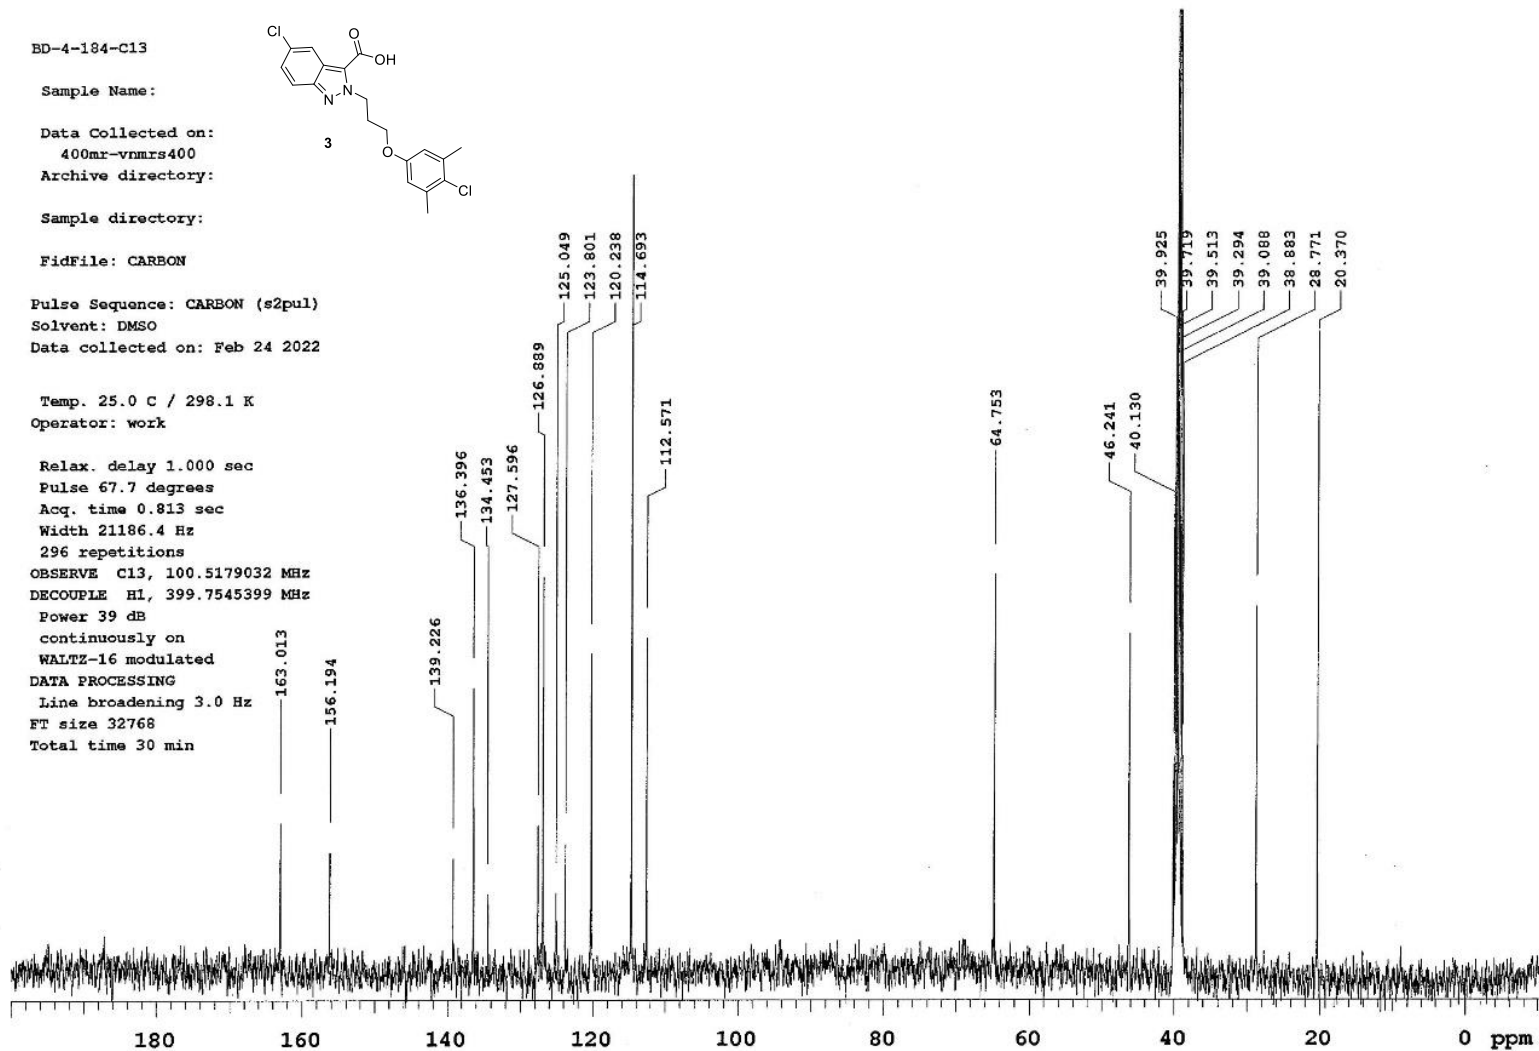

BD-4-059-1H

Sample Name:

Data Collected on:

400mr-vnmrs400

Archive directory:

Sample directory:

FidFile: PROTON

Pulse Sequence: PROTON (s2pul)

Solvent: dmsc

Data collected on: Feb 12 2019

Temp. 25.0 C / 298.1 K

Operator: work

Relax. delay 5.000 sec

Pulse 79.4 degrees

Acq. time 1.278 sec

Width 6410.3 Hz

12 repetitions

OBSERVE H1, 399.7531748 MHz

DATA PROCESSING

Line broadening 0.5 Hz

FT size 16384

Total time 3 min 21 sec

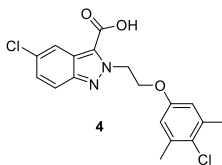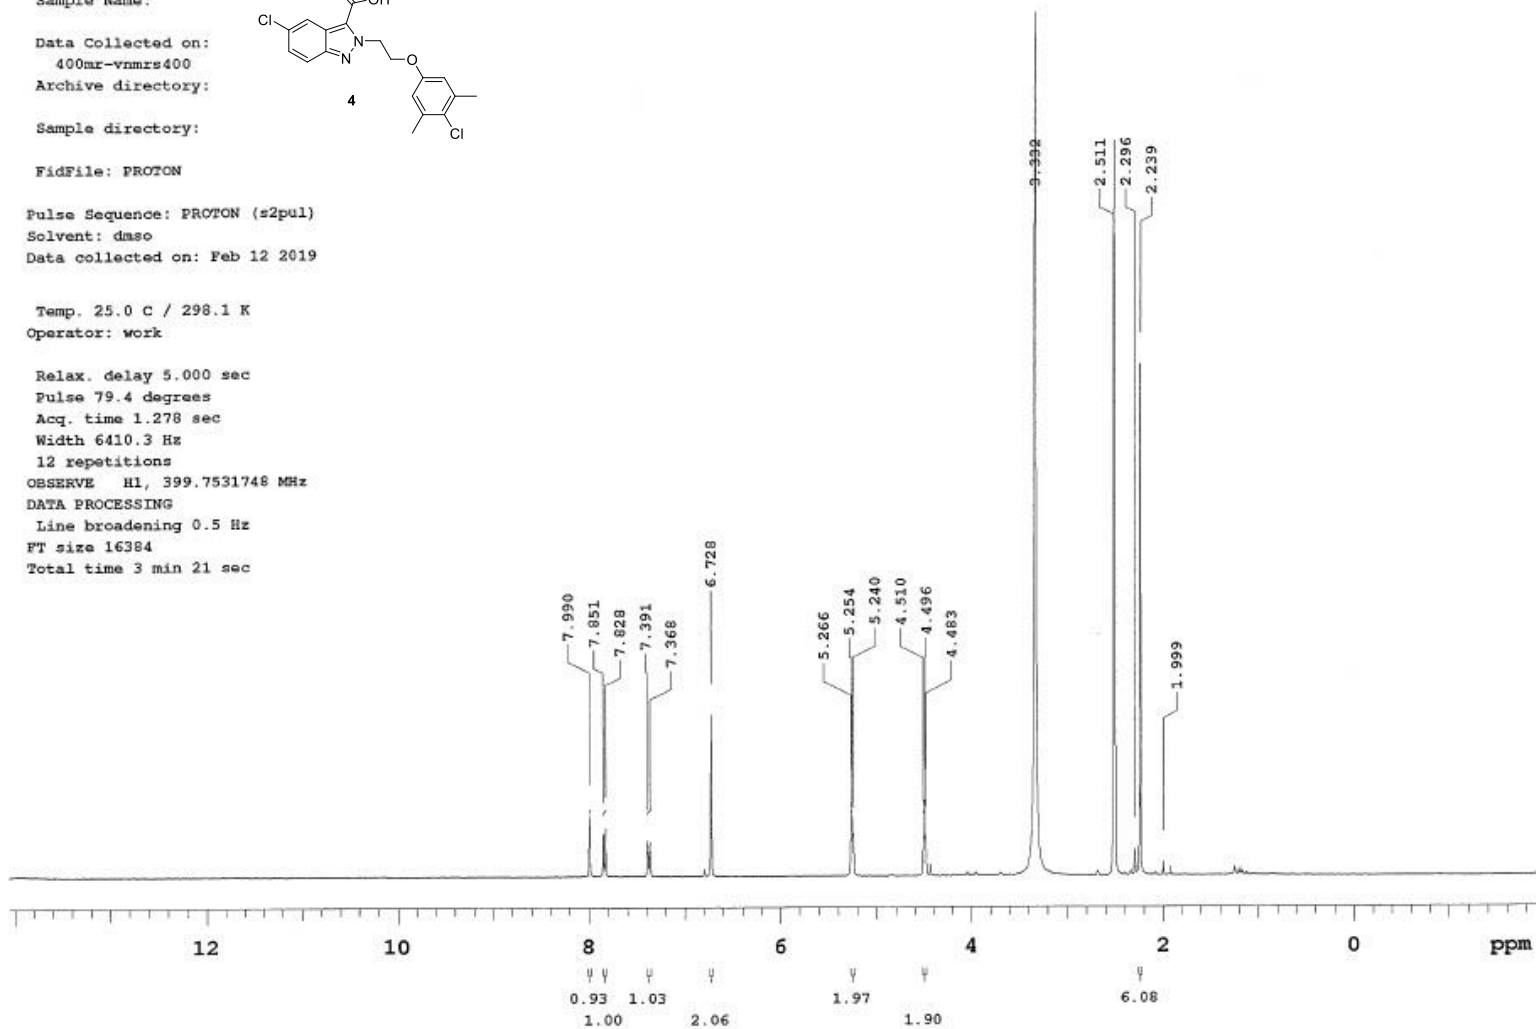

ED-4-059-13C

Sample Name:

Data Collected on:

400mr-vnmrs400

Archive directory:

Sample directory:

FidFile: CARBON

Pulse Sequence: CARBON (s2pul)

Solvent: cdcl3

Data collected on: Oct 6 2019

Temp. 22.0 C / 295.1 K

Operator: work

Relax. delay 1.000 sec

Pulse 87.1 degrees

Acq. time 0.813 sec

Width 24509.8 Hz

236 repetitions

OBSERVE C13, 100.5173790 MHz

DECOUPLE H1, 399.7526411 MHz

Power 42 dB

continuously on

WALTZ-16 modulated

DATA PROCESSING

Line broadening 3.0 Hz

FT size 32768

Total time 30 min

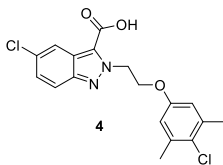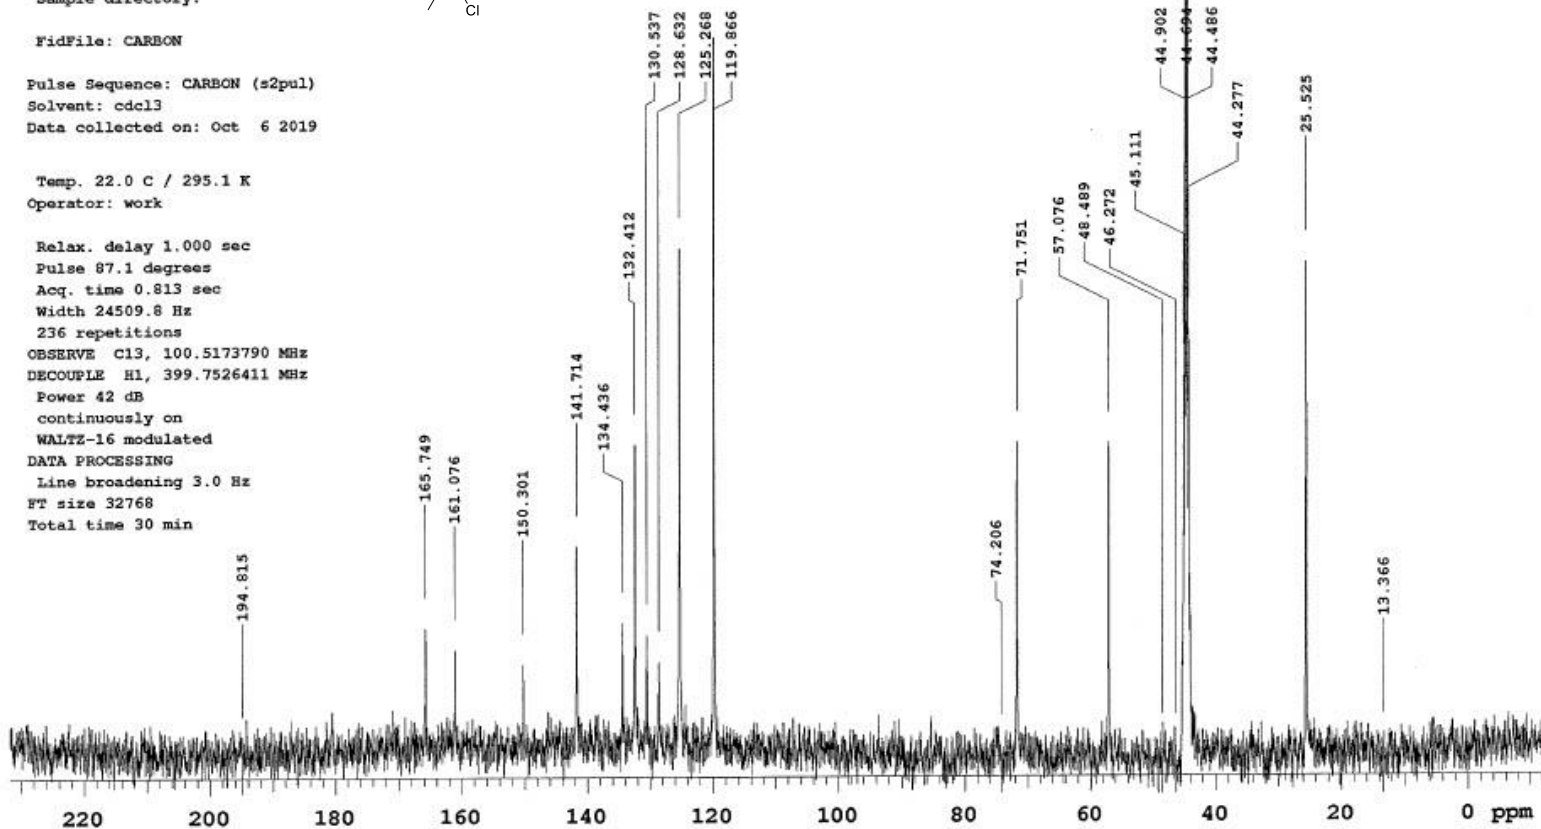

NB-1-070-1H

Sample Name:

Data Collected on:

400mr-vnmrs400

Archive directory:

Sample directory:

FidFile: PROTON

Pulse Sequence: PROTON (s2pul)

Solvent: dmsc

Data collected on: May 3 2018

Operator: work

Relax. delay 3.000 sec

Pulse 79.4 degrees

Acq. time 1.278 sec

Width 6410.3 Hz

32 repetitions

OBSERVE H1, 399.7531748 MHz

DATA PROCESSING

Line broadening 0.5 Hz

FT size 16384

Total time 2 min 17 sec

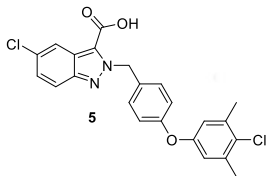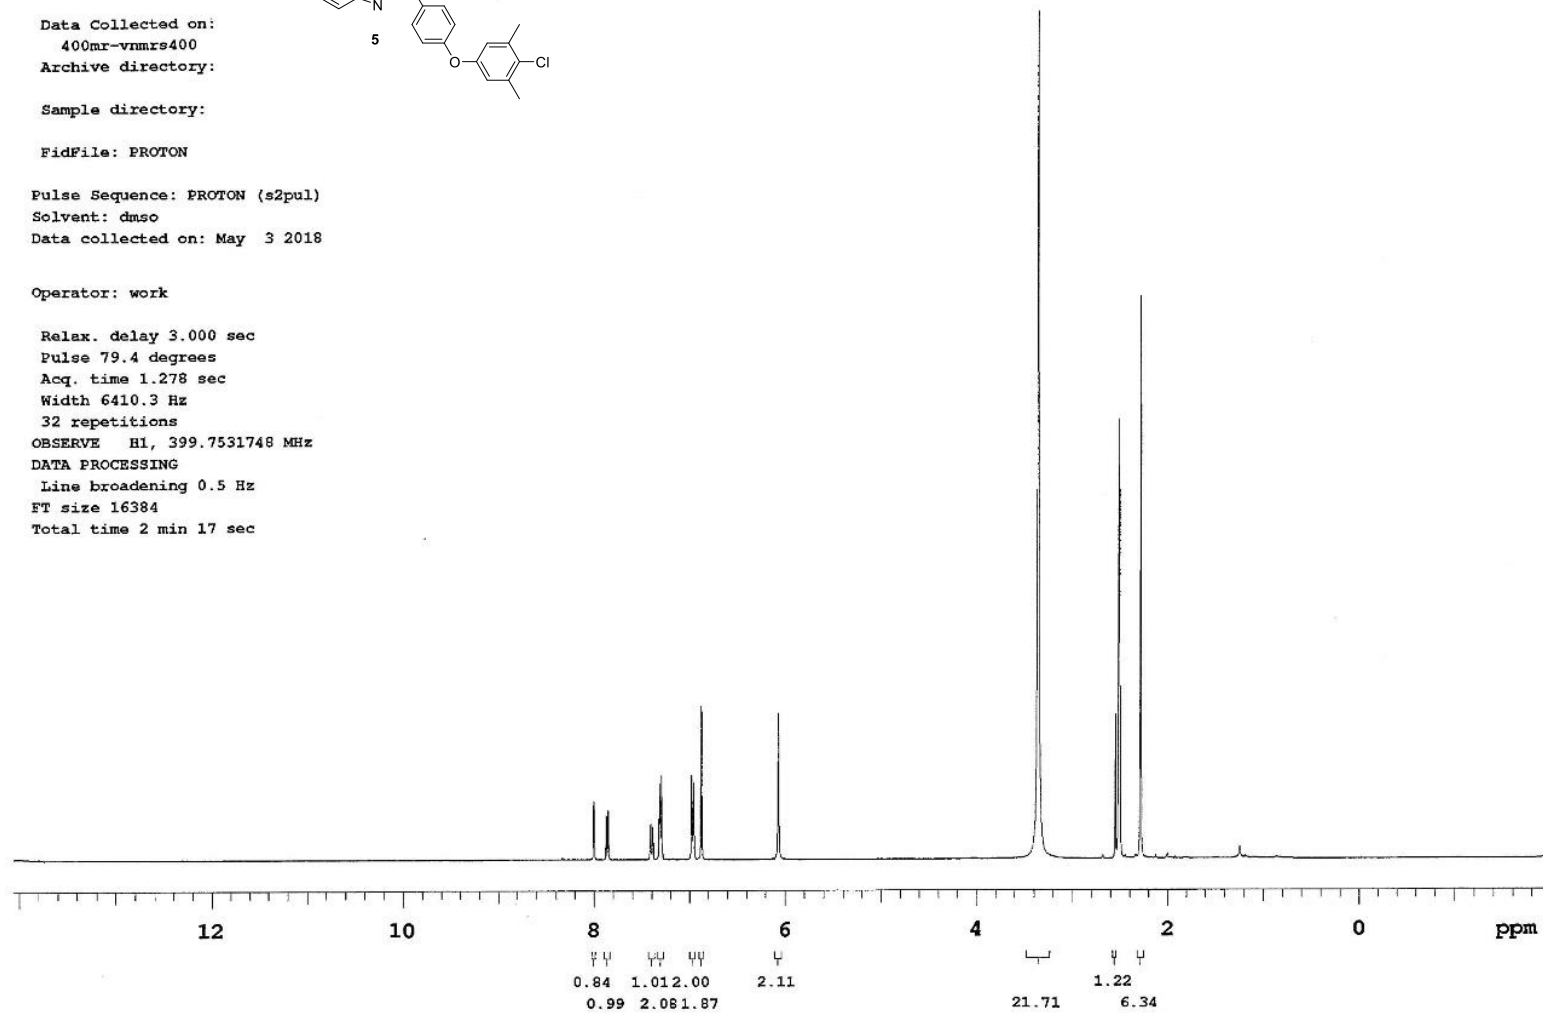

NB-1-070-13C

Sample Name:

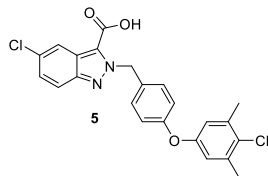

Data Collected on:

400mr-vnmrs400

Archive directory:

Sample directory:

FidFile: CARBON

Pulse Sequence: CARBON (s2pul)

Solvent: cdcl3

Data collected on: Oct 6 2019

Temp. 22.0 C / 295.1 K

Operator: work

Relax. delay 1.000 sec

Pulse 87.1 degrees

Acq. time 0.813 sec

Width 24509.8 Hz

76 repetitions

OBSERVE C13, 100.5173790 MHz

DECOUPLE H1, 399.7526411 MHz

Power 42 dB

continuously on

WALTZ-16 modulated

DATA PROCESSING

Line broadening 3.0 Hz

FT size 32768

Total time 30 min

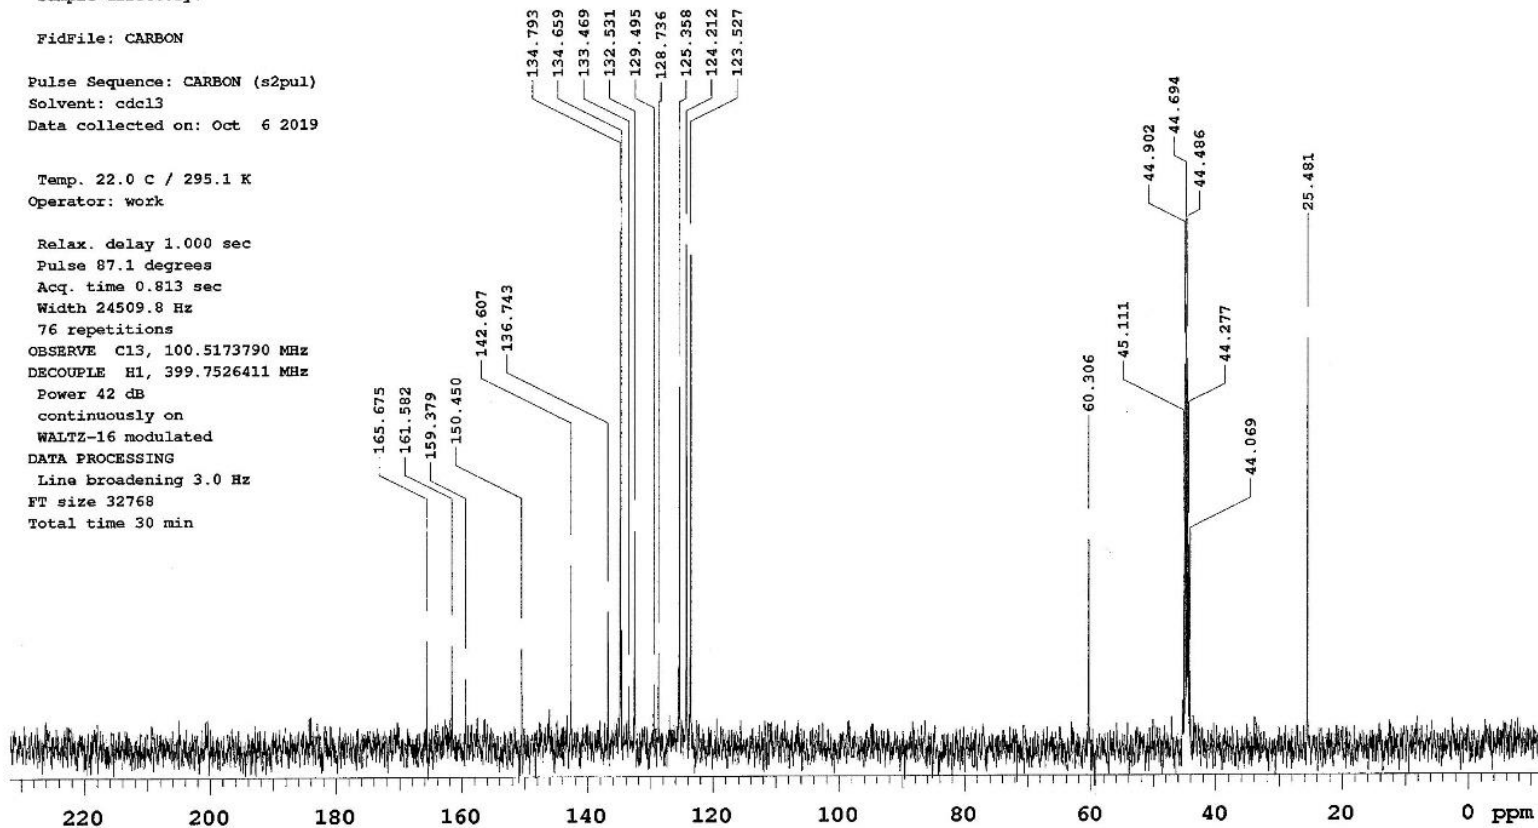



BD-4-176-1H

Sample Name:

Data Collected on:

400mr-vnmrs400

Archive directory:

Sample directory:

FidFile: PROTON

Pulse Sequence: PROTON (s2pul)

Solvent: dmsc

Data collected on: Sep 20 2019

Temp. 22.0 C / 295.1 K

Operator: work

Relax. delay 5.000 sec

Pulse 119.1 degrees

Acq. time 1.278 sec

Width 6410.3 Hz

4 repetitions

OBSERVE H1, 399.7525233 MHz

DATA PROCESSING

Line broadening 0.5 Hz

FT size 16384

Total time 3 min 21 sec

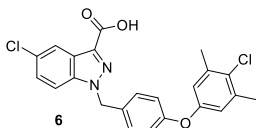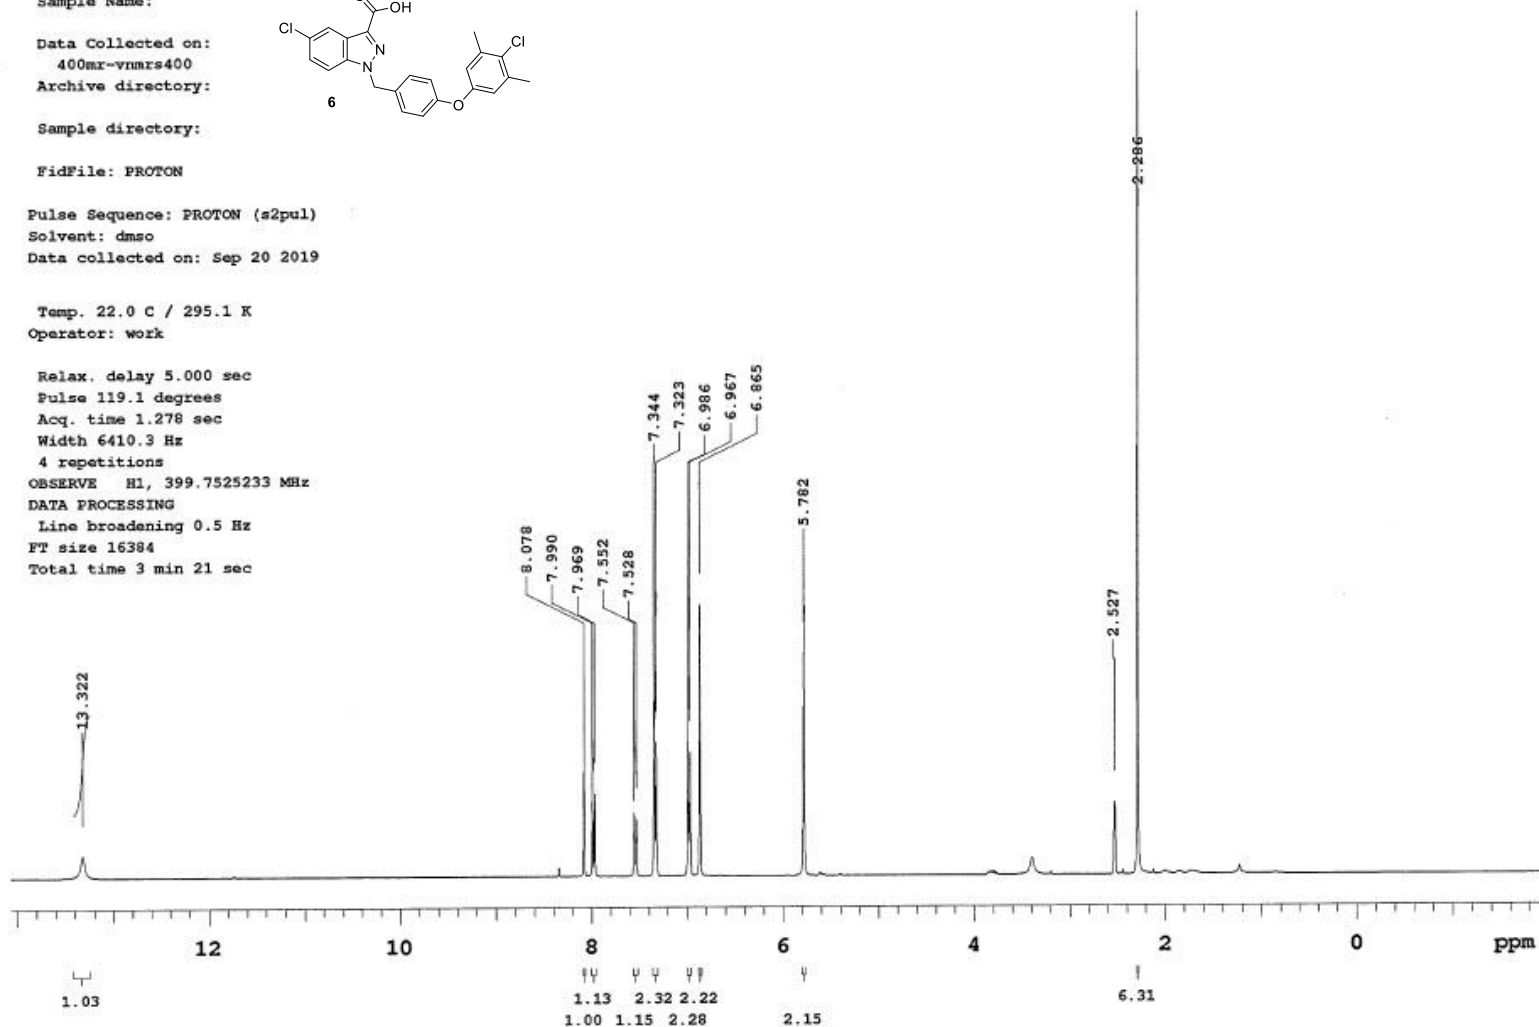

BD-4-176-13C

Sample Name:

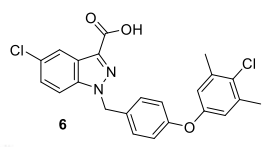

Data Collected on:  
400mr-vnmrs400  
Archive directory:

Sample directory:

FidFile: CARBON

Pulse Sequence: CARBON (s2pul)  
Solvent: cdcl3  
Data collected on: Sep 20 2019

Temp. 22.0 C / 295.1 K  
Operator: work

Relax. delay 1.000 sec  
Pulse 87.1 degrees  
Acq. time 0.813 sec  
Width 21186.4 Hz  
108 repetitions

OBSERVE C13, 100.5173790 MHz  
DECOUPLE H1, 399.7526411 MHz  
Power 42 dB  
continuously on  
WALTZ-16 modulated  
DATA PROCESSING  
Line broadening 3.0 Hz  
FT size 32768  
Total time 30 min

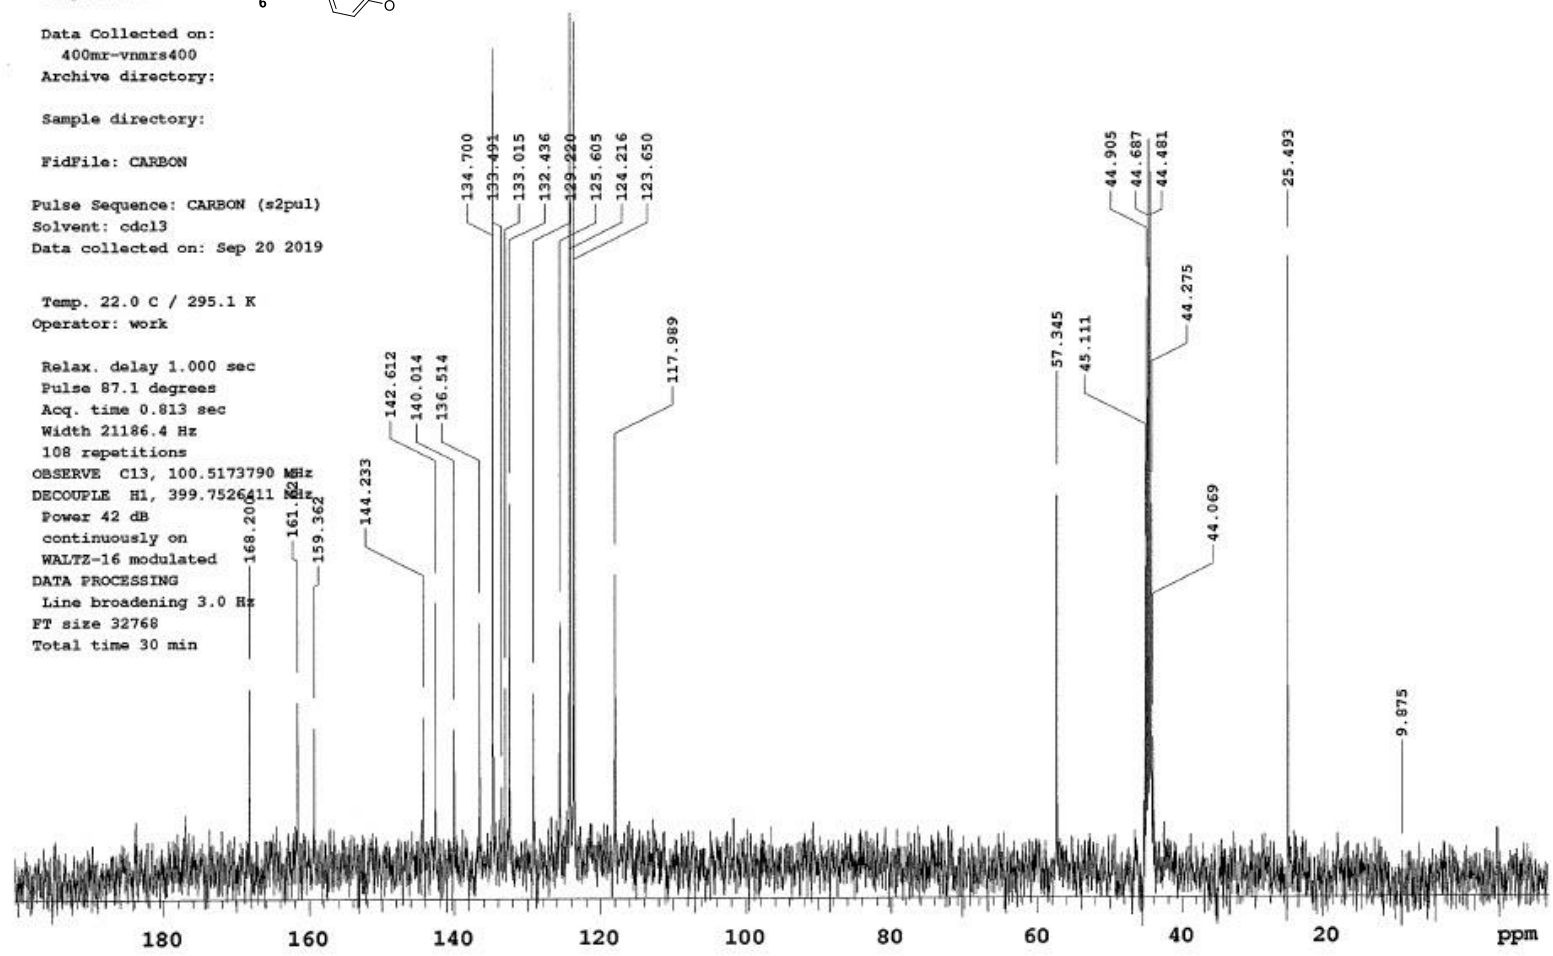

BD-4-104T-1H

Sample Name:

Data Collected on:

400mr-vmrs400

Archive directory:

Sample directory:

FidFile: PROTON

Pulse Sequence: PROTON (s2pul)

Solvent: dmsc

Data collected on: May 14 2019

Temp. 22.0 C / 295.1 K

Operator: work

Relax. delay 5.000 sec

Pulse 79.4 degrees

Acq. time 1.278 sec

Width 6410.3 Hz

16 repetitions

OBSERVE H1, 399.7525233 MHz

DATA PROCESSING

Line broadening 0.5 Hz

FT size 16384

Total time 3 min 21 sec

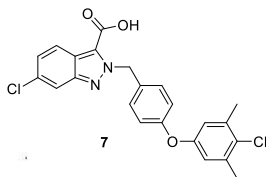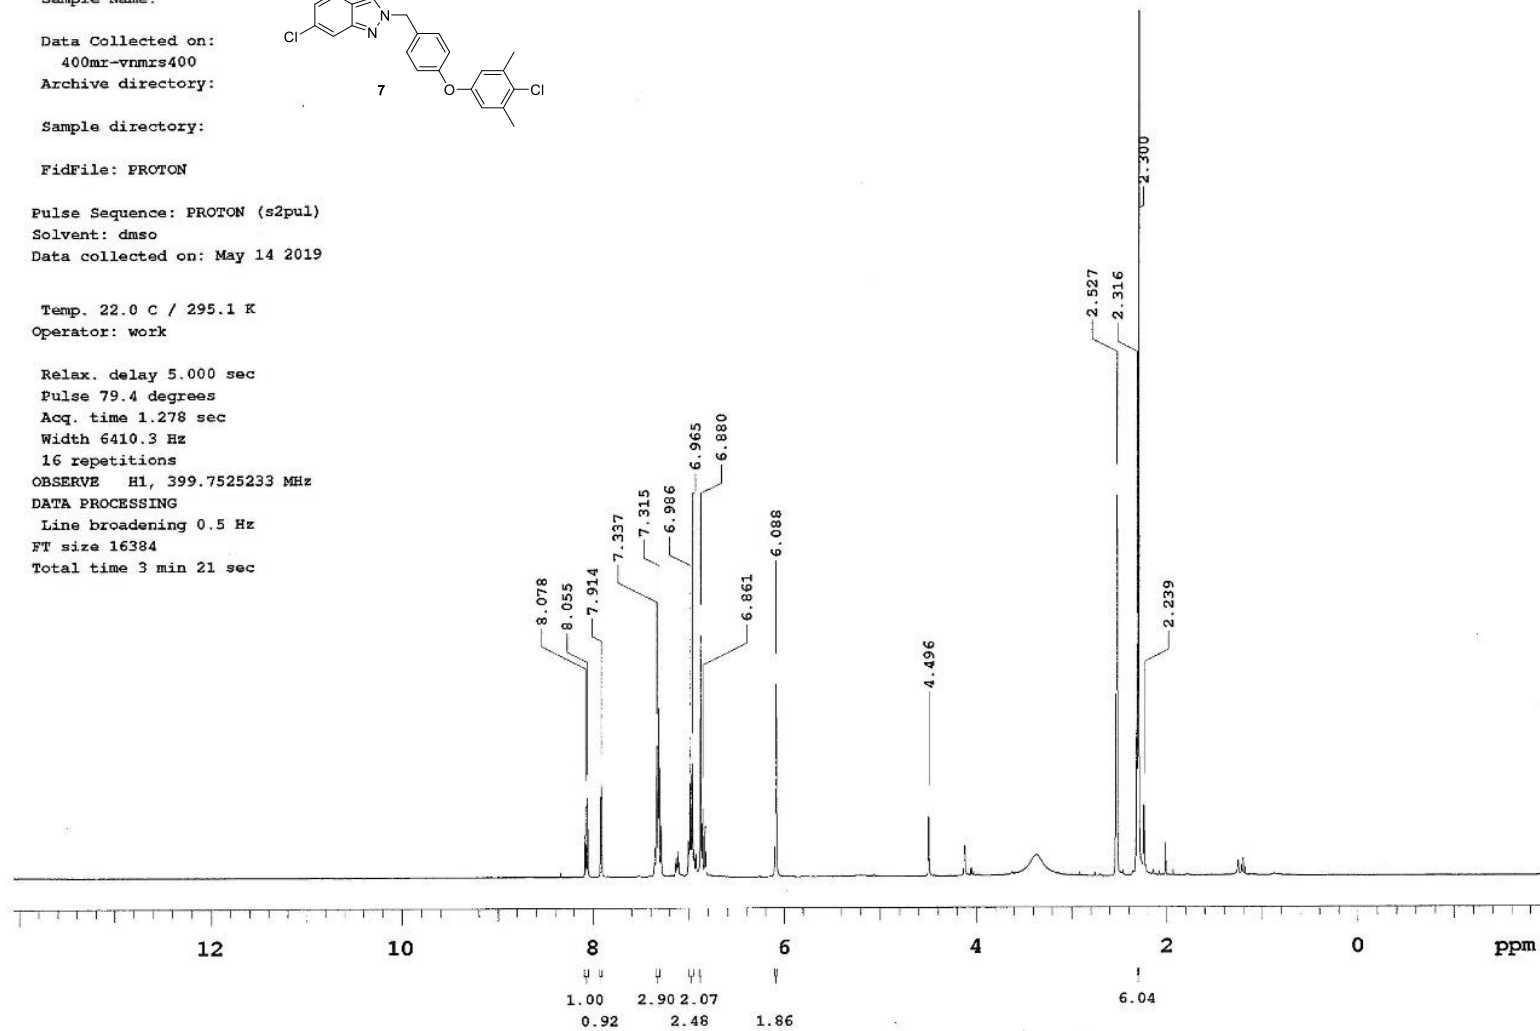

BD-4-104T-13C

Sample Name:

Data Collected on:  
400mr-vnmrs400  
Archive directory:

Sample directory:

FidFile: BD-4-104T-13C

Pulse Sequence: CARBON (s2pul)  
Solvent: dmsd  
Data collected on: Mar 3 2022

Temp. 25.0 C / 298.1 K  
Operator: work

Relax. delay 1.000 sec  
Pulse 67.7 degrees  
Acq. time 0.813 sec  
Width 21186.4 Hz  
196 repetitions  
OBSERVE C13, 100.5178564 MHz  
DECOUPLE H1, 399.7545399 MHz  
Power 39 dB  
continuously on  
WALTZ-16 modulated  
DATA PROCESSING  
Line broadening 3.0 Hz  
FT size 32768  
Total time 30 min

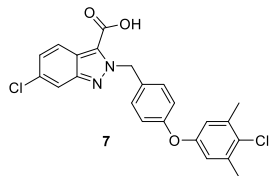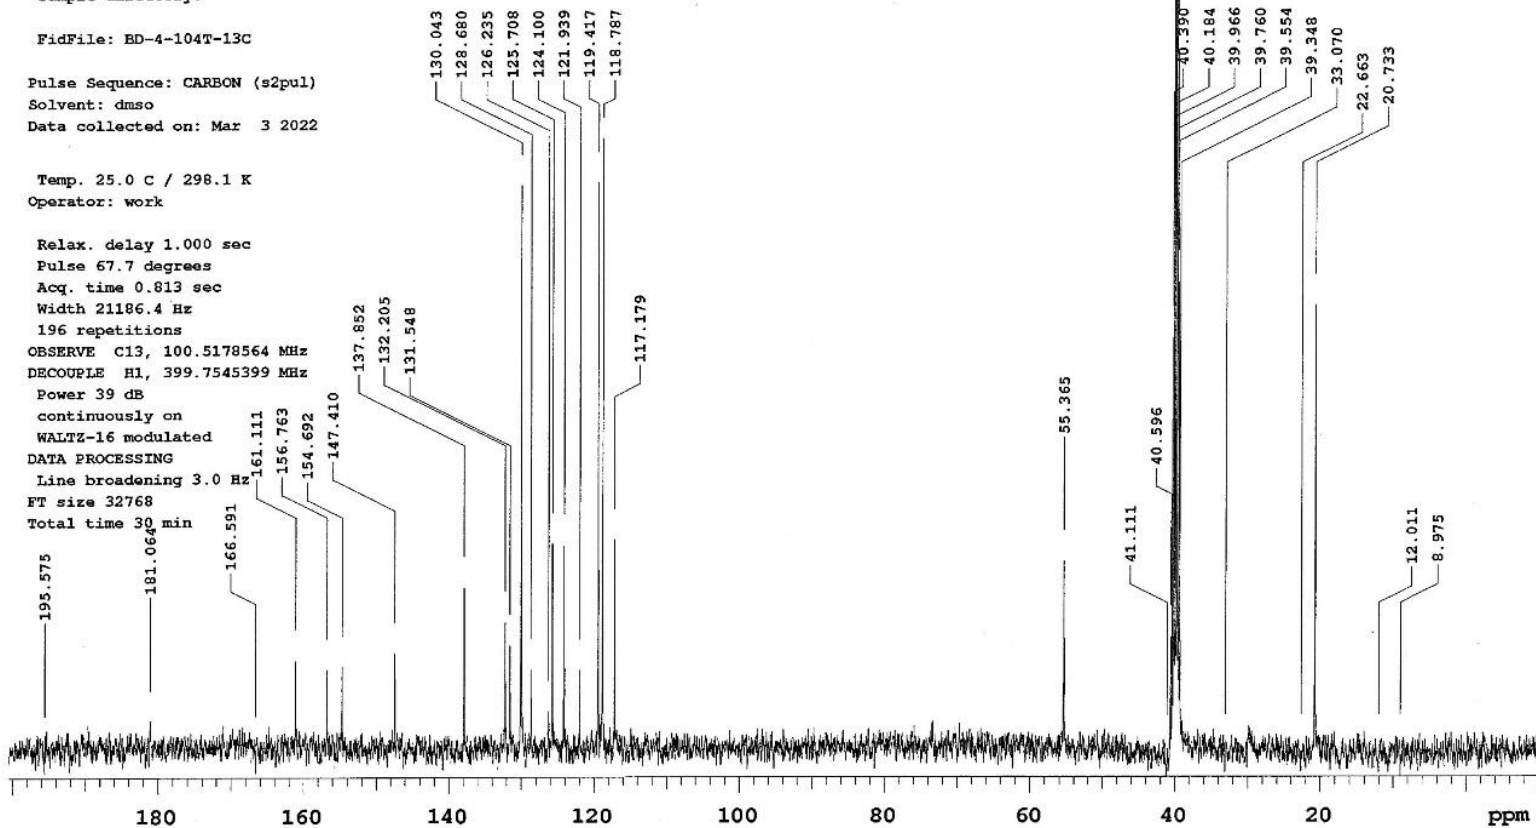

BD-3-164-1H

Sample Name:

Data Collected on:

400mr-vnmrs400

Archive directory:

Sample directory:

FidFile: PROTON

Pulse Sequence: PROTON (s2pul)

Solvent: dmsc

Data collected on: Feb 24 2022

Temp. 25.0 C / 298.1 K

Operator: work

Relax. delay 5.000 sec

Pulse 92.6 degrees

Acq. time 1.278 sec

Width 6410.3 Hz

16 repetitions

OBSERVE H1, 399.7525412 MHz

DATA PROCESSING

Line broadening 0.5 Hz

FT size 16384

Total time 3 min 21 sec

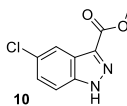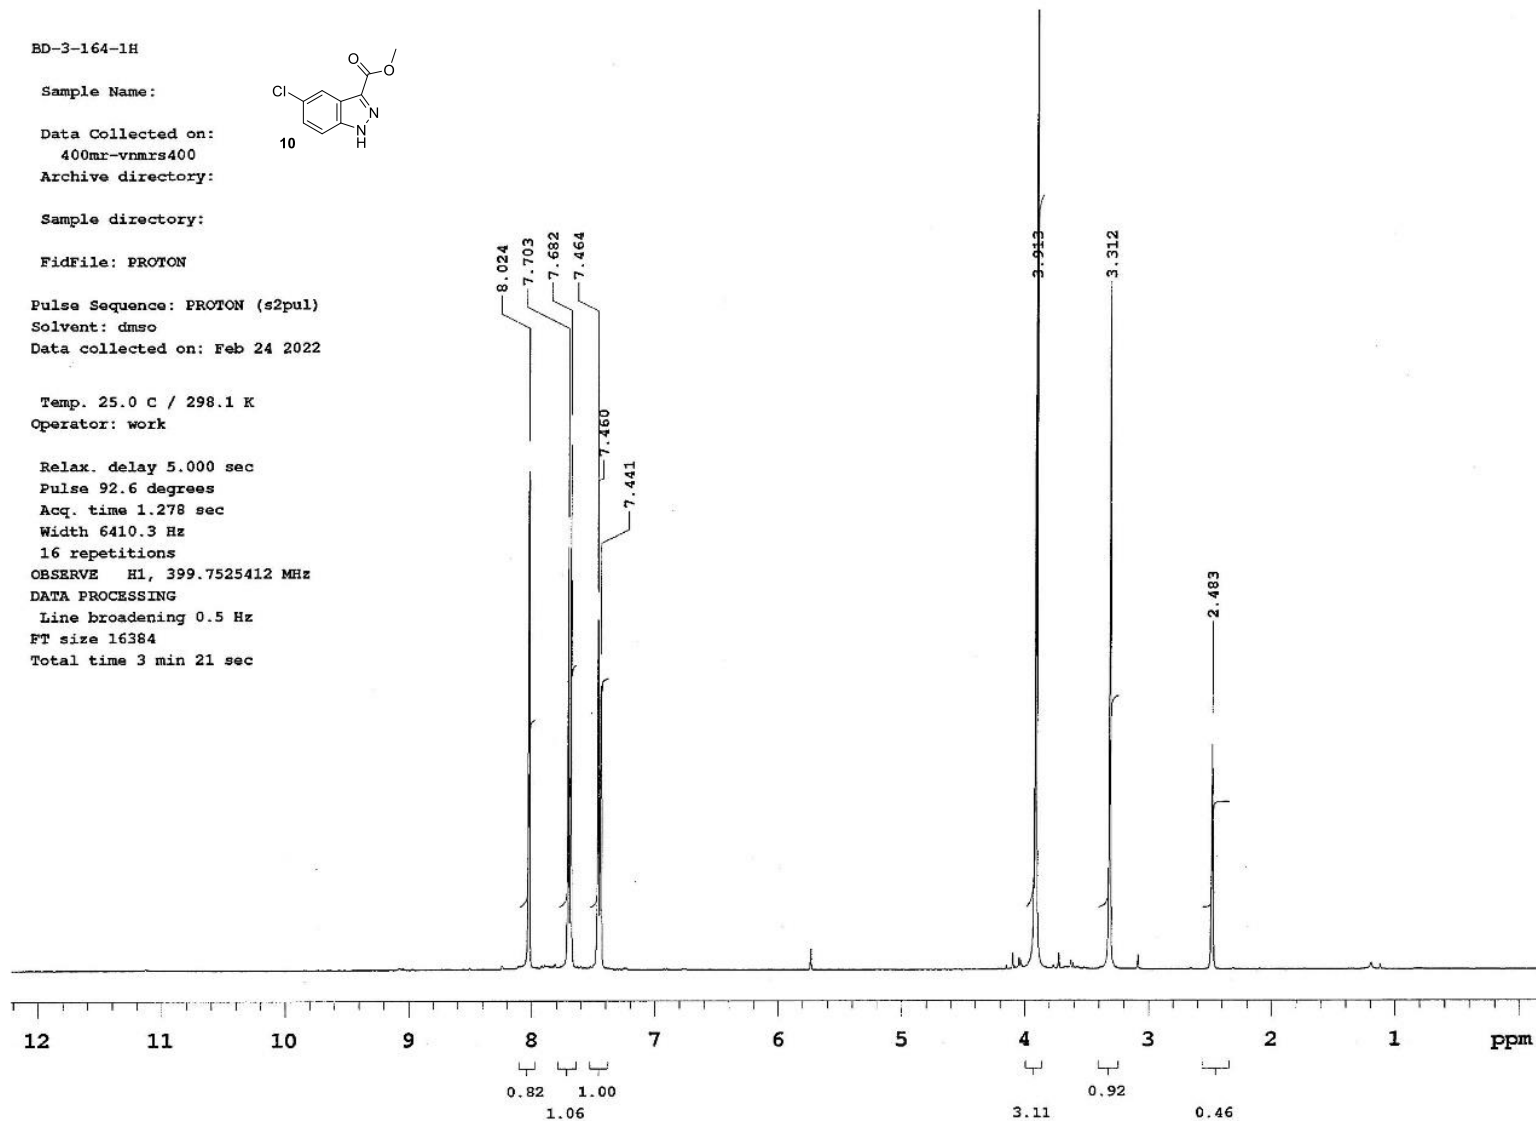

BD-3-164-13C

Sample Name:

Data Collected on:

400mr-vnmrs400

Archive directory:

Sample directory:

FidFile: CARBON

Pulse Sequence: CARBON (s2pul)

Solvent: DMSO

Data collected on: Feb 24 2022

Temp. 25.0 C / 298.1 K

Operator: work

Relax. delay 1.000 sec

Pulse 67.7 degrees

Acq. time 0.813 sec

Width 21186.4 Hz

248 repetitions

OBSERVE c13, 100.5178564 MHz

DECOUPLE H1, 399.7545399 MHz

Power 39 dB

continuously on

WALTZ-16 modulated

DATA PROCESSING

Line broadening 3.0 Hz

FT size 32768

Total time 30 min

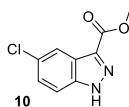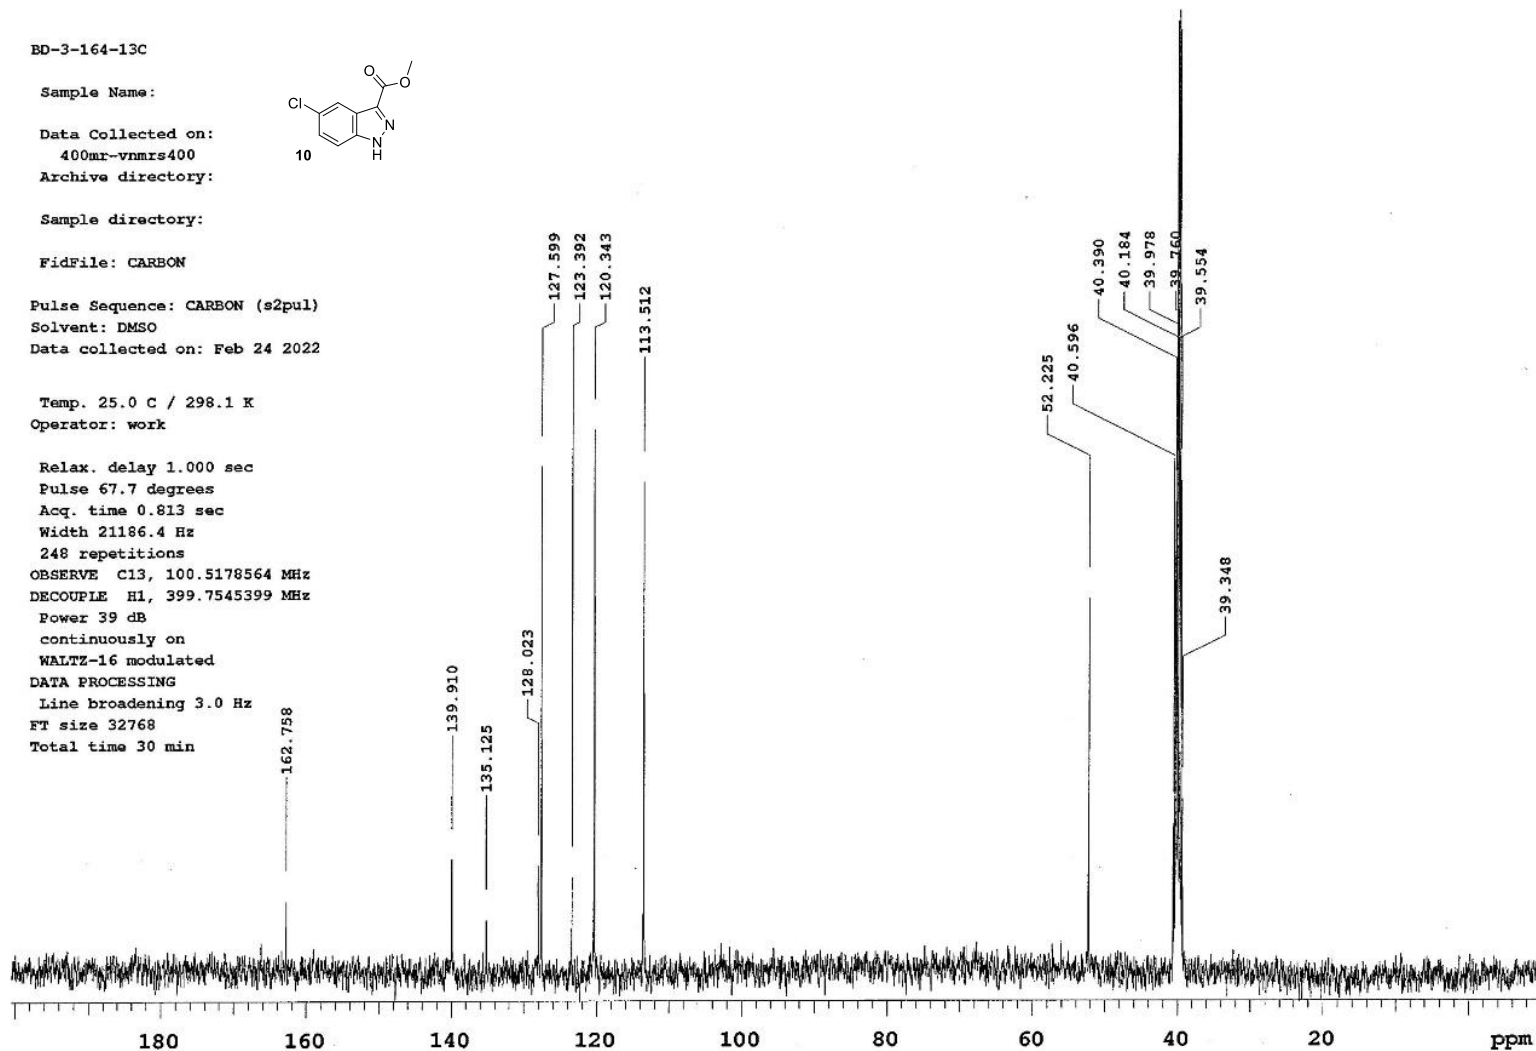

NB-1-069-1H

Sample Name:

Data Collected on:

400mr-vnmrs400

Archive directory:

Sample directory:

FidFile: PROTON

Pulse Sequence: PROTON (s2pul)

Solvent: cdcl3

Data collected on: May 1 2018

Temp. 22.0 C / 295.1 K

Operator: work

Relax. delay 5.000 sec

Pulse 79.4 degrees

Acq. time 1.278 sec

Width 6410.3 Hz

32 repetitions

OBSERVE H1, 399.7512853 MHz

DATA PROCESSING

Line broadening 0.5 Hz

FT size 16384

Total time 3 min 21 sec

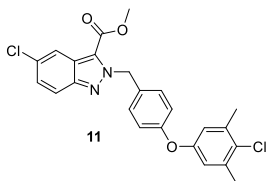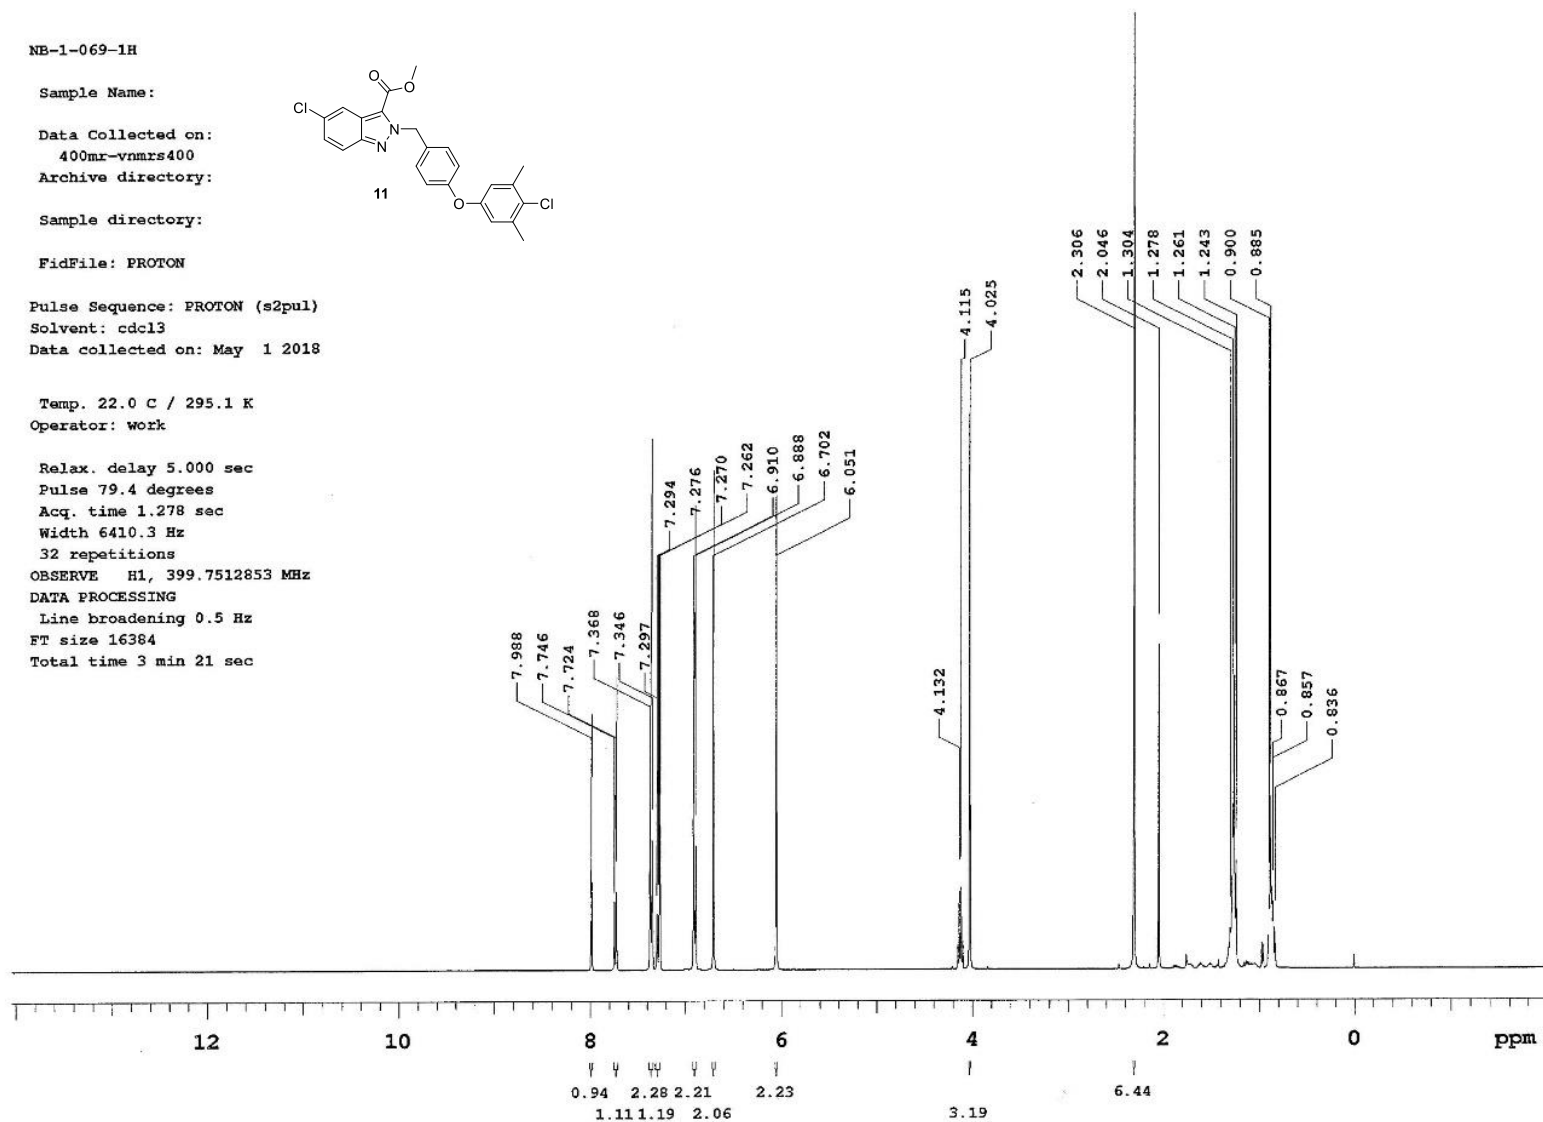

NB-1-069-13C

Sample Name:

Data Collected on:

400mr-vnmrs400

Archive directory:

Sample directory:

FidFile: CARBON

Pulse Sequence: CARBON (s2pul)

Solvent: cdc13

Data collected on: Dec 15 2019

Temp. 22.0 C / 295.1 K

Operator: work

Relax. delay 1.000 sec

Pulse 87.1 degrees

Acq. time 0.813 sec

Width 21186.4 Hz

136 repetitions

OBSERVE C13, 100.5173790 MHz

DECOUPLE H1, 399.7526411 MHz

Power 42 dB

continuously on

WALTZ-16 modulated

DATA PROCESSING

Line broadening 3.0 Hz

FT size 32768

Total time 30 min

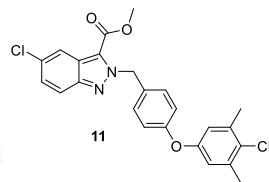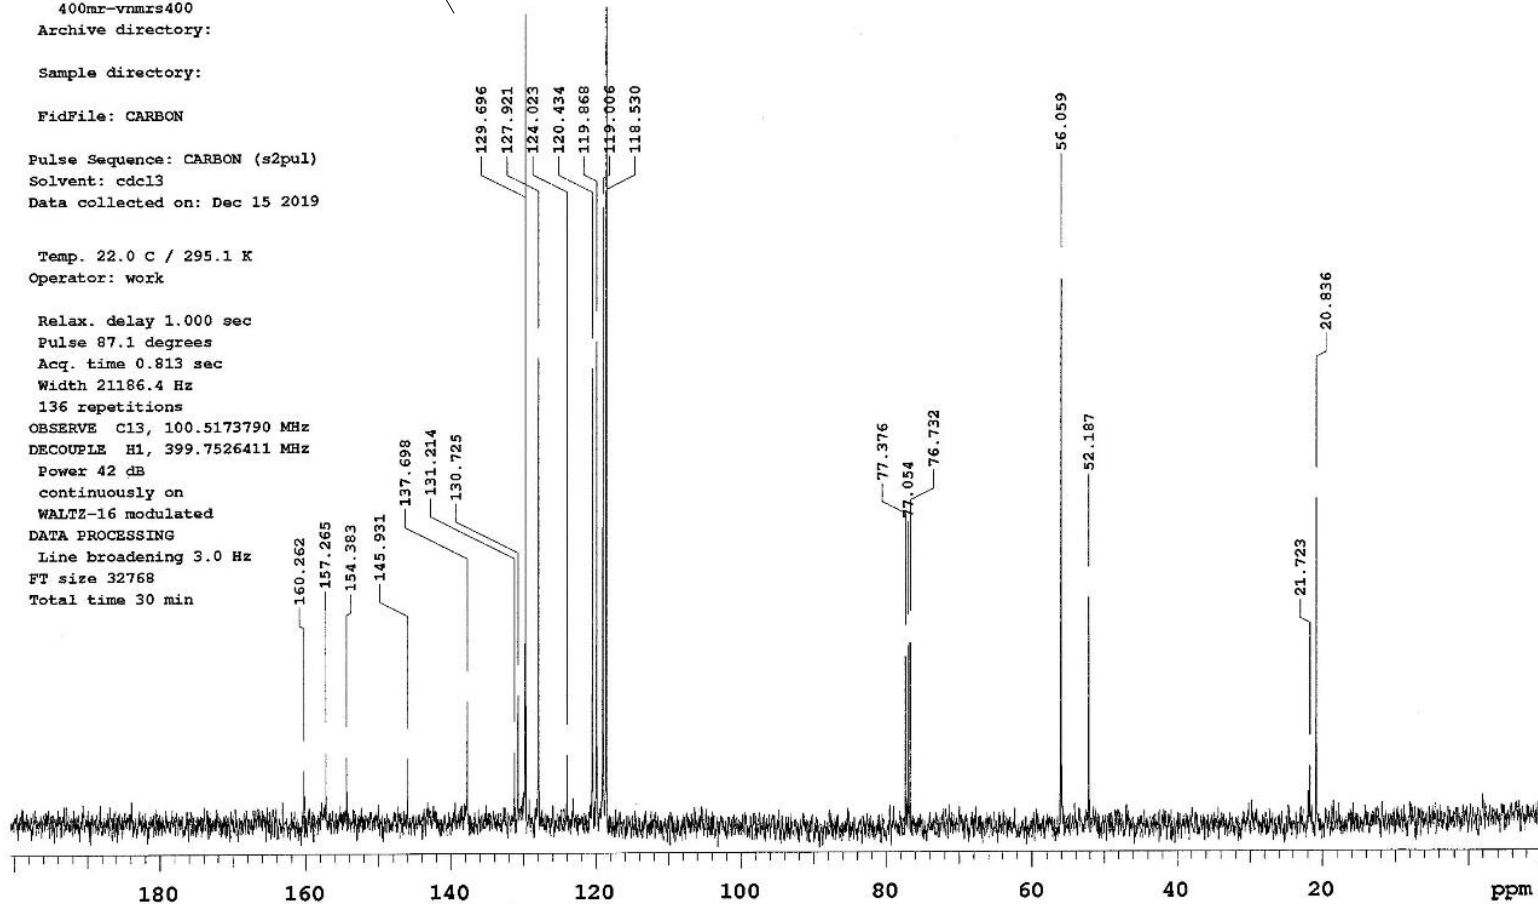



BD-4-175-1H

Sample Name:

Data Collected on:

400mr-vmrs400

Archive directory:

Sample directory:

FidFile: PROTON

Pulse Sequence: PROTON (s2pul)

Solvent: cdcl3

Data collected on: Sep 19 2019

Temp. 22.0 C / 295.1 K

Operator: work

Relax. delay 5.000 sec

Pulse 119.1 degrees

Acq. time 1.278 sec

Width 6410.3 Hz

4 repetitions

OBSERVE H1, 399.7506339 MHz

DATA PROCESSING

Line broadening 0.5 Hz

FT size 16384

Total time 3 min 21 sec

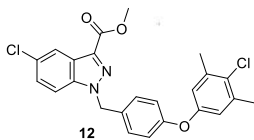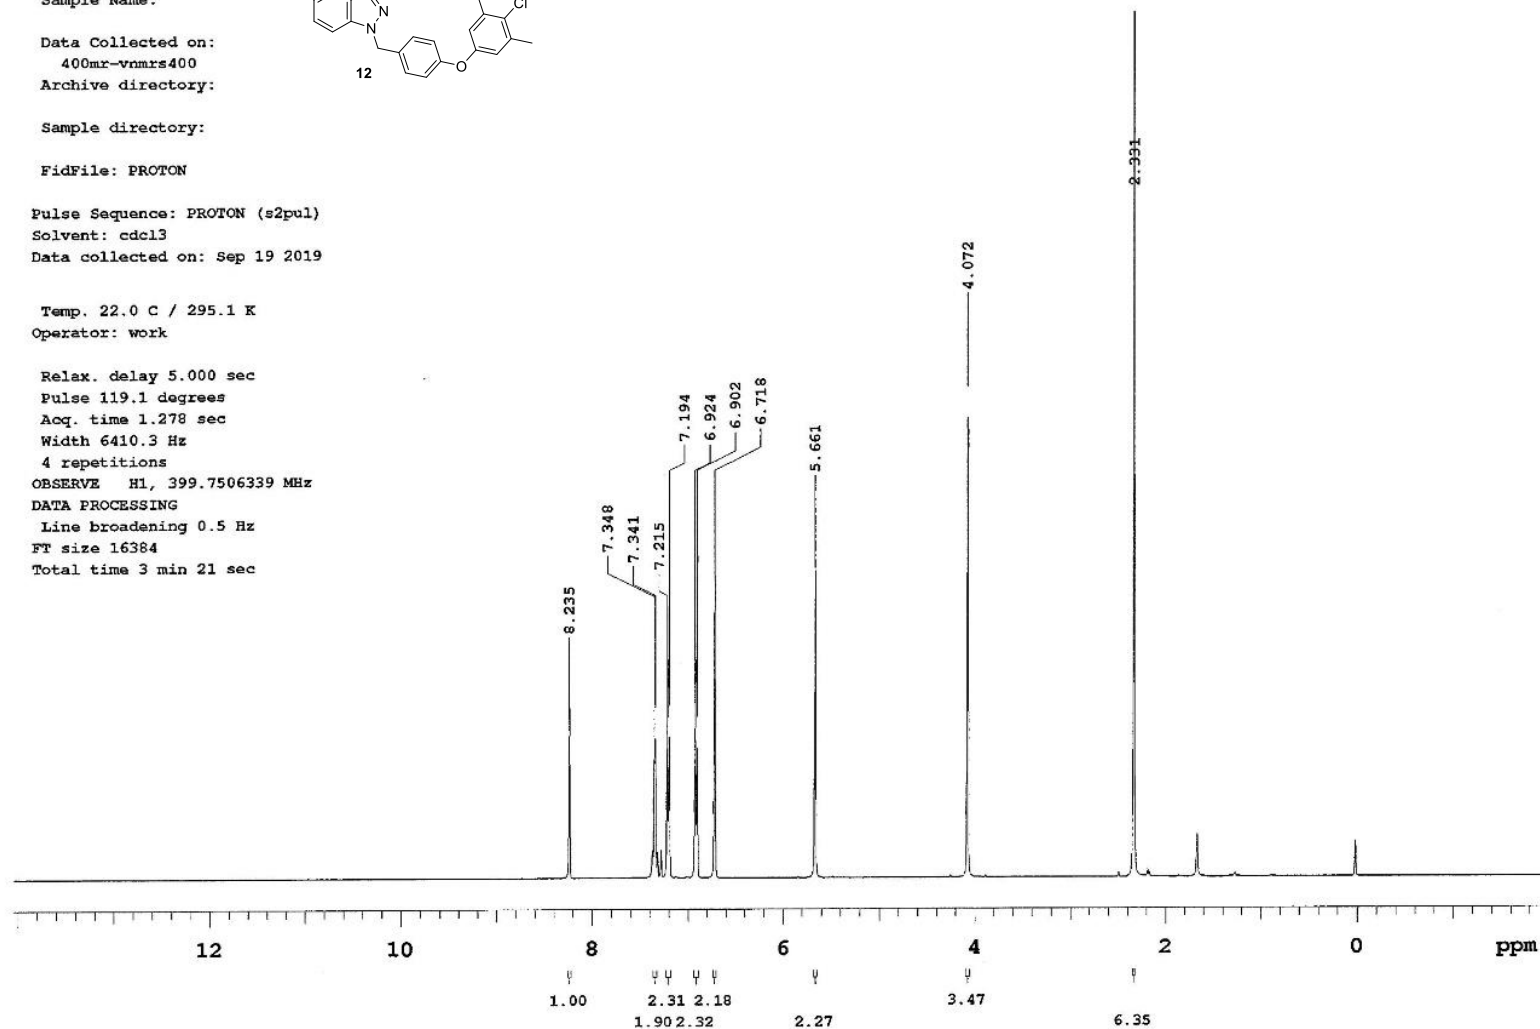

BD-4-175-13C

Sample Name:

Data Collected on:  
400mr-vmrs400  
Archive directory:

Sample directory:

FidFile: CARBON

Pulse Sequence: CARBON (s2pul)  
Solvent: cdcl3  
Data collected on: Sep 19 2019

Temp. 22.0 C / 295.1 K  
Operator: work

Relax. delay 1.000 sec  
Pulse 87.1 degrees  
Acq. time 0.813 sec  
Width 21186.4 Hz  
132 repetitions  
OBSERVE C13, 100.5173790 MHz  
DECOUPLE H1, 399.7526411 MHz  
Power 42 dB  
continuously on  
WALTZ-16 modulated  
DATA PROCESSING  
Line broadening 3.0 Hz  
FT size 32768  
Total time 30 min

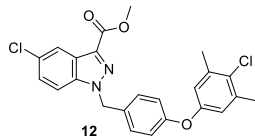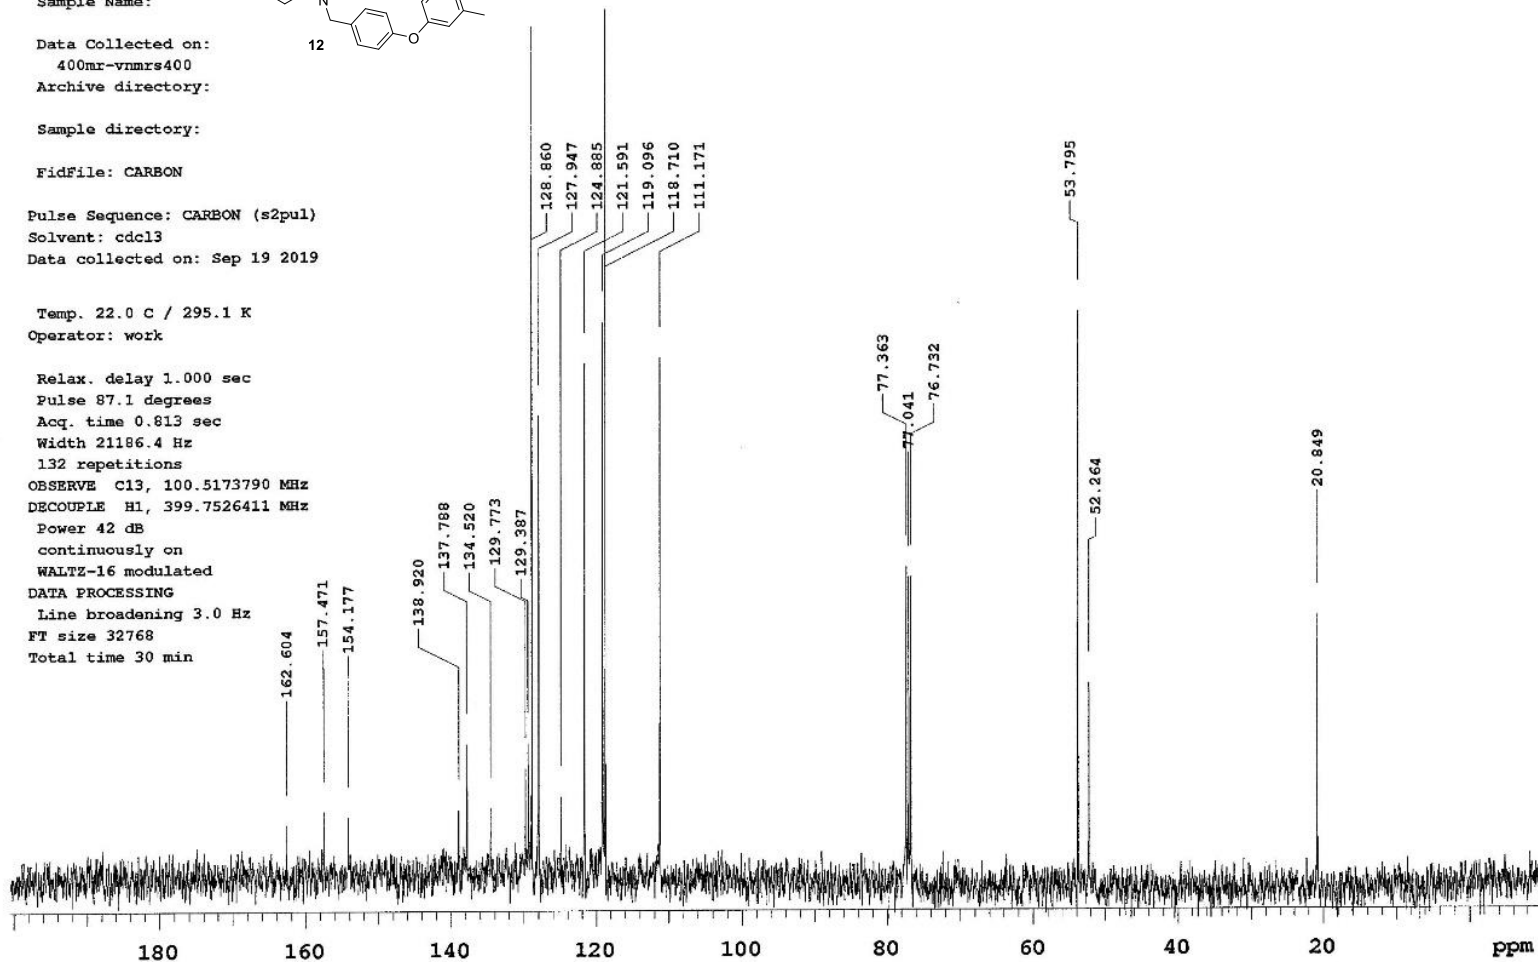

NB-1-084-1H

Sample Name:

Data Collected on:

400mr-vnmrs400

Archive directory:

Sample directory:

FidFile: PROTON

Pulse Sequence: PROTON (s2pul)

Solvent: dmsc

Data collected on: May 23 2018

Operator: work

Relax. delay 3.000 sec

Pulse 79.4 degrees

Acq. time 1.278 sec

Width 6410.3 Hz

32 repetitions

OBSERVE H1, 399.7531748 MHz

DATA PROCESSING

Line broadening 0.5 Hz

FT size 16384

Total time 2 min 17 sec

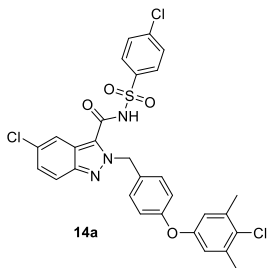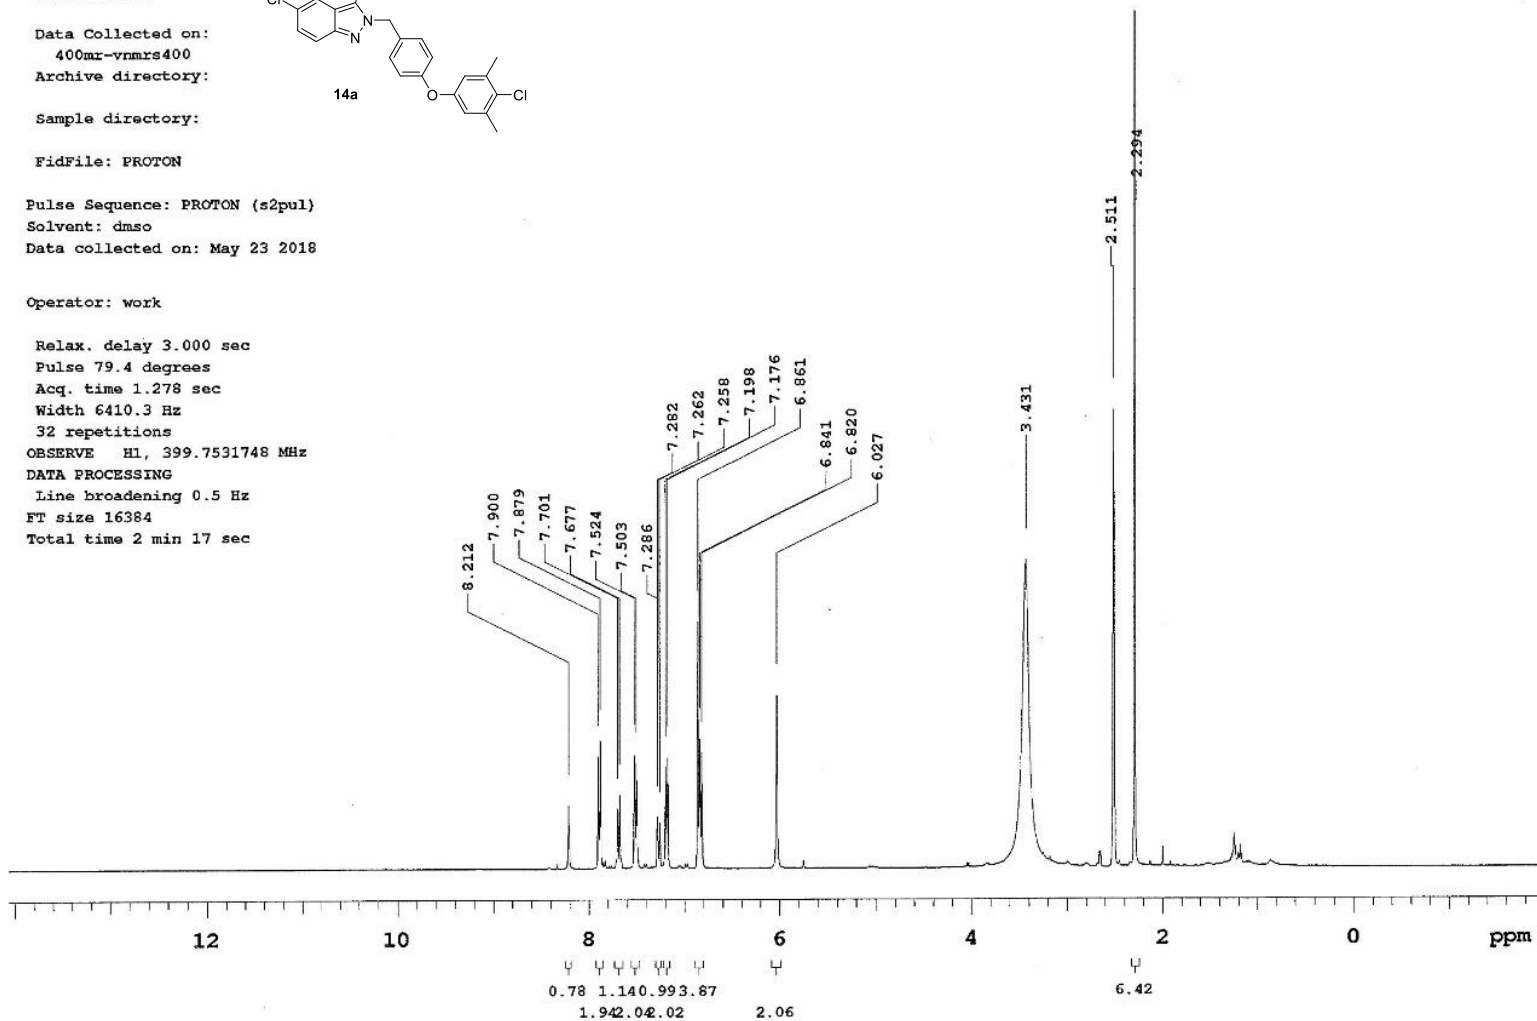

NB-1-084-13C

Sample Name:

Data Collected on:  
400mr-vnmrs400  
Archive directory:

Sample directory:

FidFile: CARBON

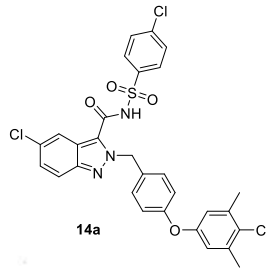

Pulse Sequence: CARBON (s2pul)  
Solvent: DMSO  
Data collected on: Feb 24 2022

Temp. 25.0 C / 298.1 K  
Operator: work

Relax. delay 1.000 sec  
Pulse 67.7 degrees  
Acq. time 0.813 sec  
Width 21186.4 Hz  
408 repetitions  
OBSERVE C13, 100.5178564 MHz  
DECOUPLE H1, 399.7545399 MHz  
Power 39 dB  
continuously on  
WALTZ-16 modulated  
DATA PROCESSING  
Line broadening 3.0 Hz  
FT size 32768  
Total time 30 min

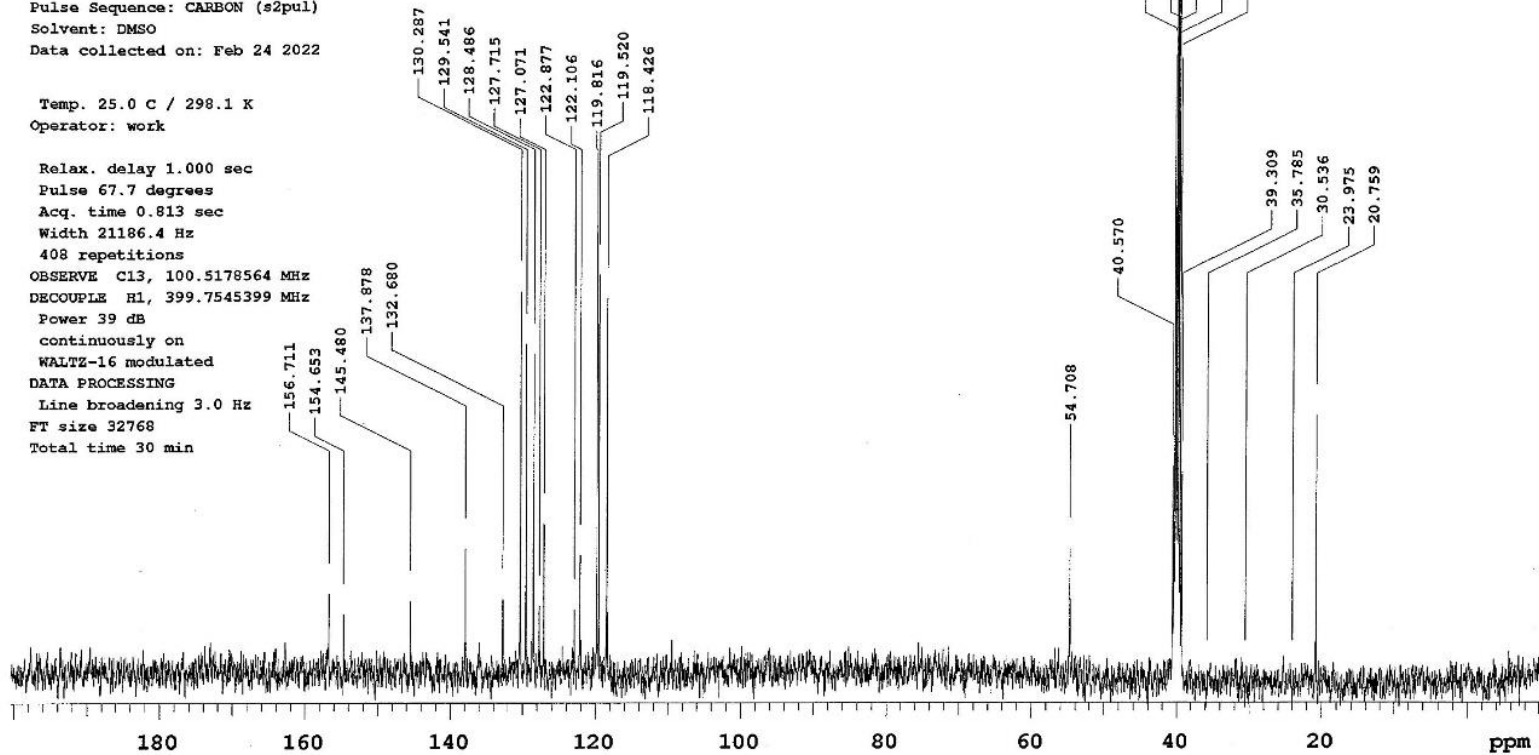

NB-1-086-1H

Sample Name:

Data Collected on:

400mr-vmars400

Archive directory:

Sample directory:

FidFile: PROTON

Pulse Sequence: PROTON (s2pul)

Solvent: dms0

Data collected on: May 30 2018

Operator: work

Relax. delay 3.000 sec

Pulse 79.4 degrees

Acq. time 1.278 sec

Width 6410.3 Hz

32 repetitions

OBSERVE H1, 399.7531748 MHz

DATA PROCESSING

Line broadening 0.5 Hz

FT size 16384

Total time 2 min 17 sec

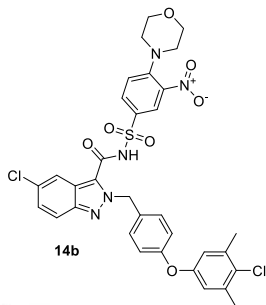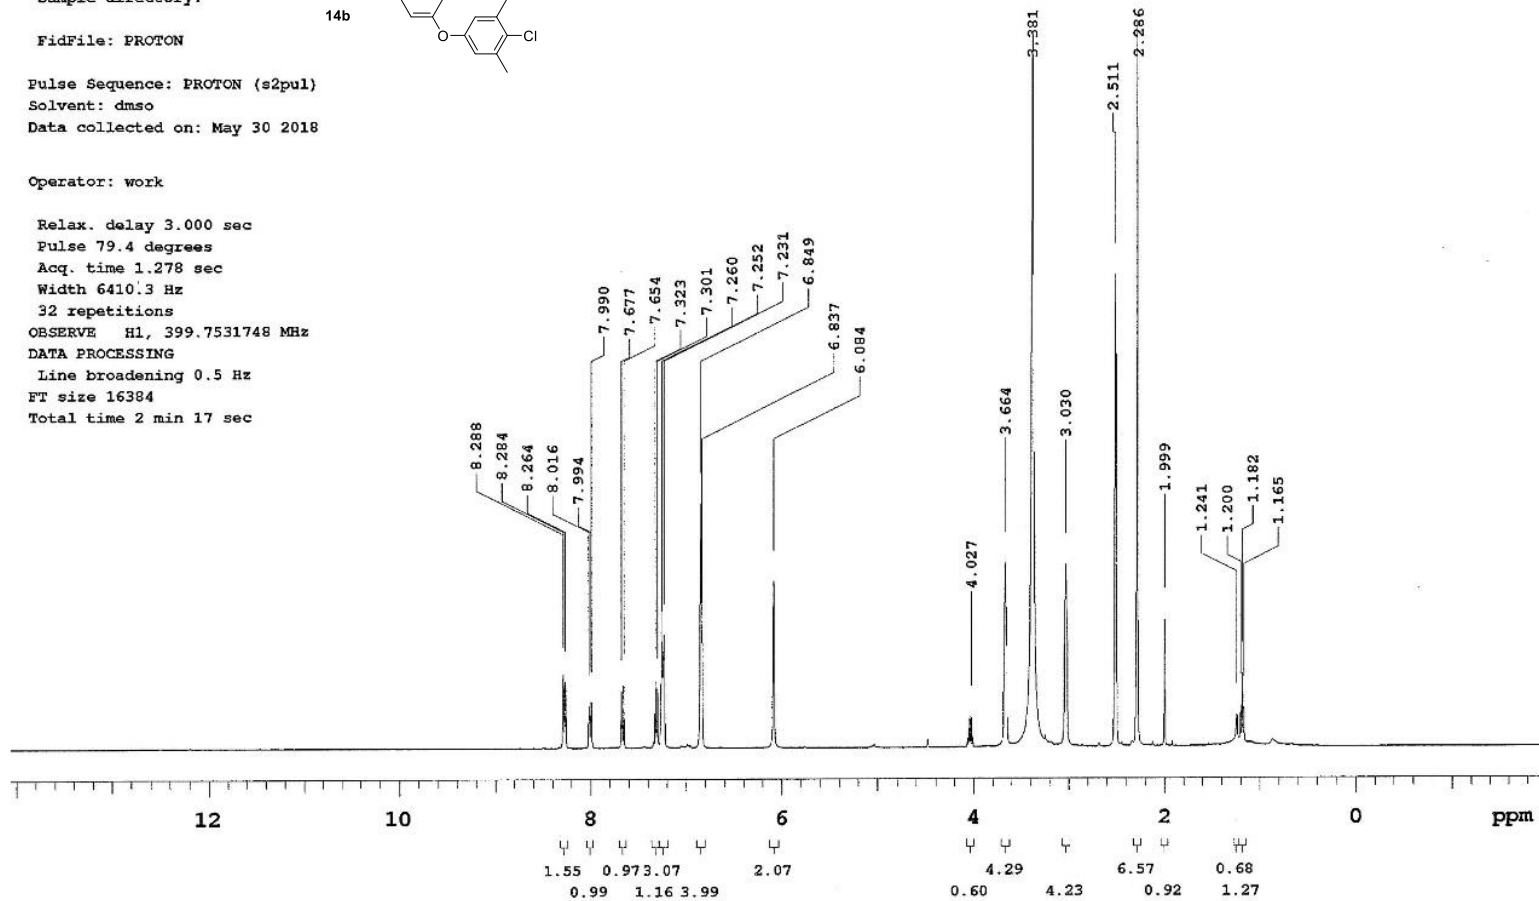

NB-1-086-13C

Sample Name:

Data Collected on:  
400mr-vnmrs400

Archive directory:

Sample directory:

FidFile: CARBON

Pulse Sequence: CARBON (s2pul)

Solvent: dmsd

Data collected on: Jun 29 2018

Temp. 22.0 C / 295.1 K

Operator: work

Relax. delay 1.000 sec

Pulse 45.0 degrees

Acq. time 1.285 sec

Width 25510.2 Hz

356 repetitions

OBSERVE C13, 100.5180202 MHz

DECOUPLE H1, 399.7551914 MHz

Power 39 dB

continuously on

WALTZ-16 modulated

DATA PROCESSING

Line broadening 0.5 Hz

FT size 65536

Total time 38 min

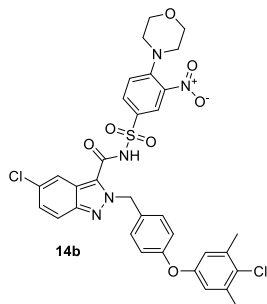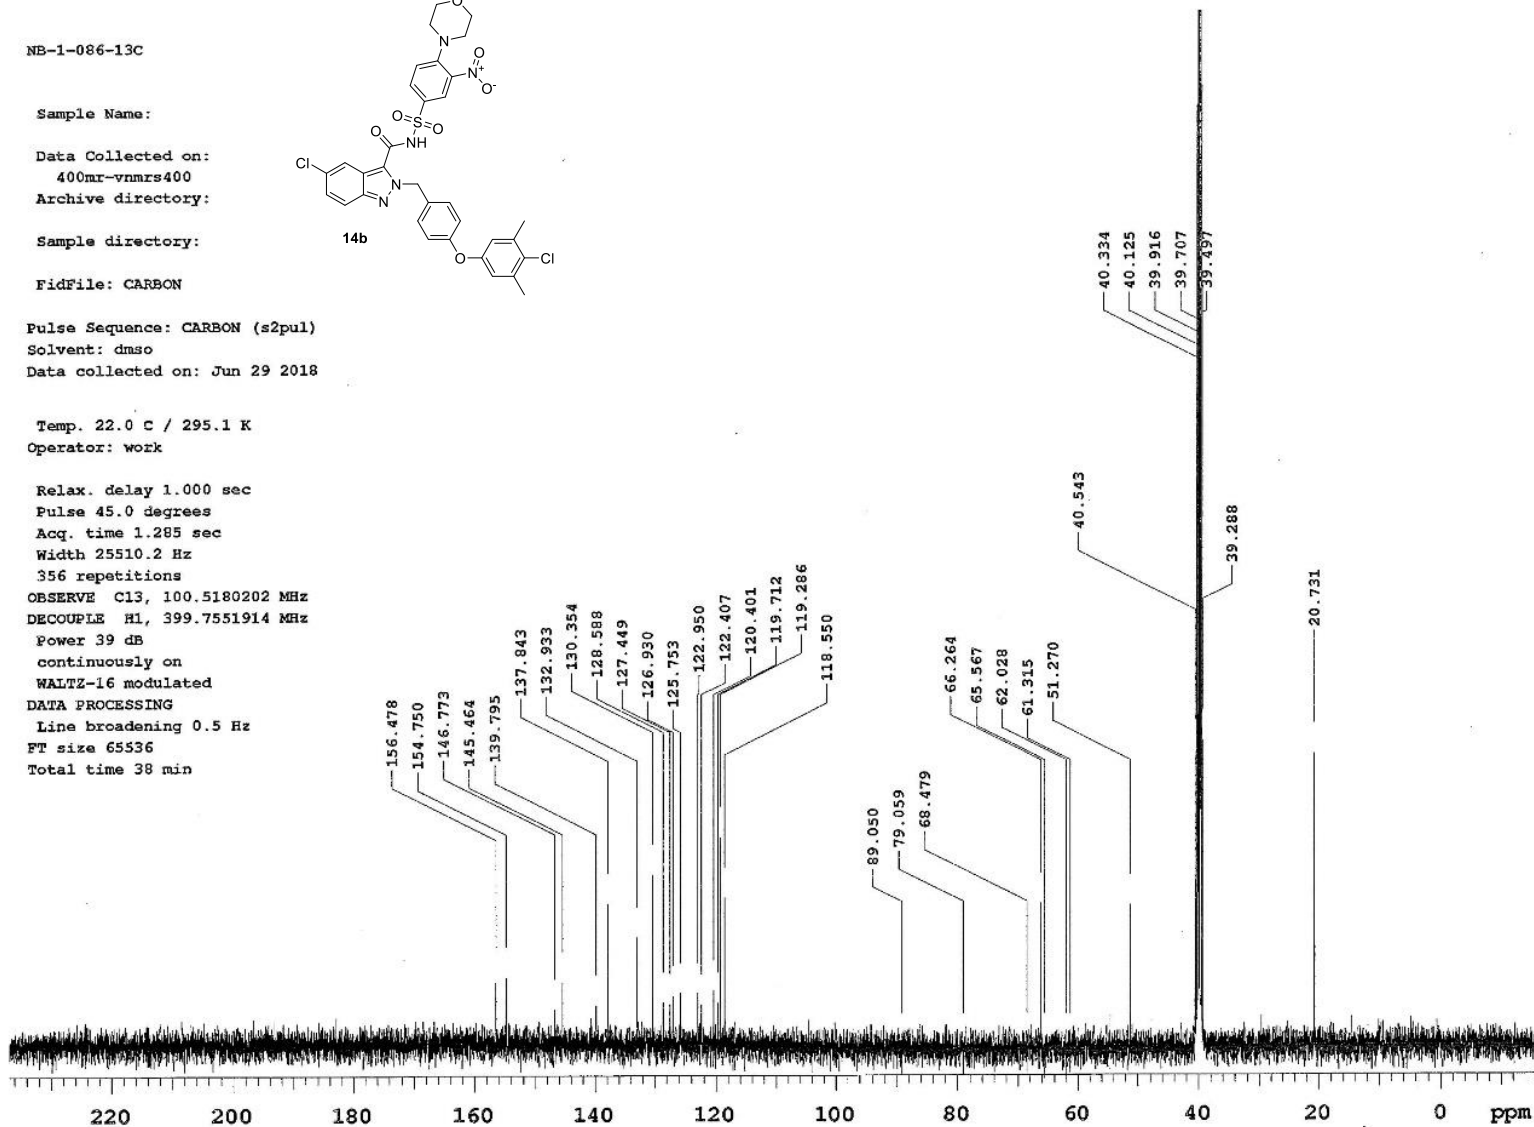

NB-1-088-1H

Sample Name:

Data Collected on:

400mr-vnmrs400

Archive directory:

Sample directory:

FidFile: PROTON

Pulse Sequence: PROTON (s2pul)

Solvent: dmsc

Data collected on: Jun 6 2018

Temp. 22.0 C / 295.1 K

Operator: work

Relax. delay 3.000 sec

Pulse 79.4 degrees

Acq. time 1.278 sec

Width 6410.3 Hz

32 repetitions

OBSERVE H1, 399.7531748 MHz

DATA PROCESSING

Line broadening 0.5 Hz

FT size 16384

Total time 2 min 17 sec

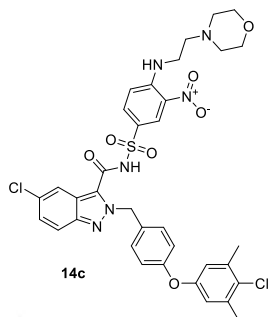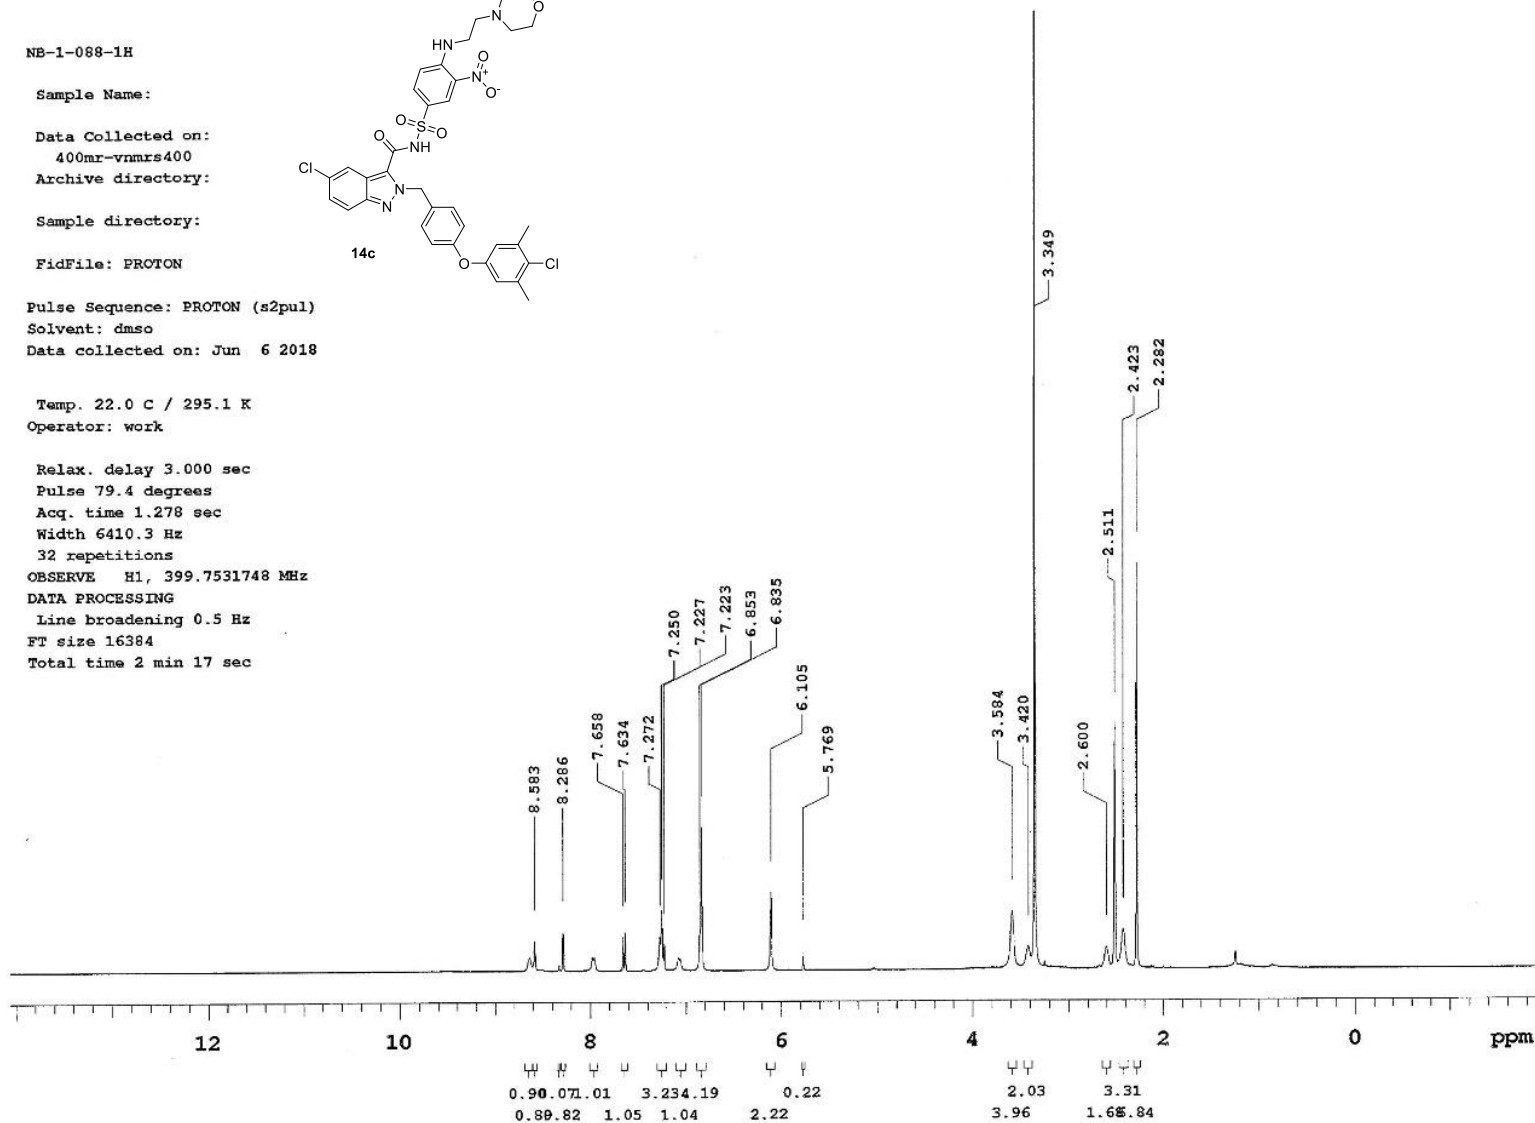

NB-1-088-13C

Sample Name:

Data Collected on:

400mr-vnmrs400

Archive directory:

Sample directory:

FidFile: NB-1-088-13C

Pulse Sequence: CARBON (s2pul)

Solvent: dmsc

Data collected on: Sep 27 2019

Temp. 22.0 C / 295.1 K

Operator: work

Relax. delay 1.000 sec

Pulse 87.1 degrees

Acq. time 0.813 sec

Width 21186.4 Hz

120 repetitions

OBSERVE C13, 100.625 MHz

DECOUPLE H1, 399.625 MHz

Power 42 dB

continuously on

WALTZ-16 modulated

DATA PROCESSING

Line broadening 3.0 Hz

FT size 32768

Total time 30 min

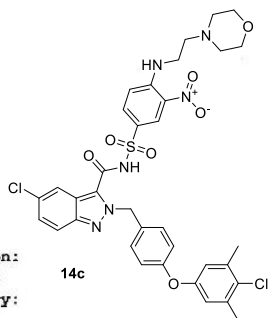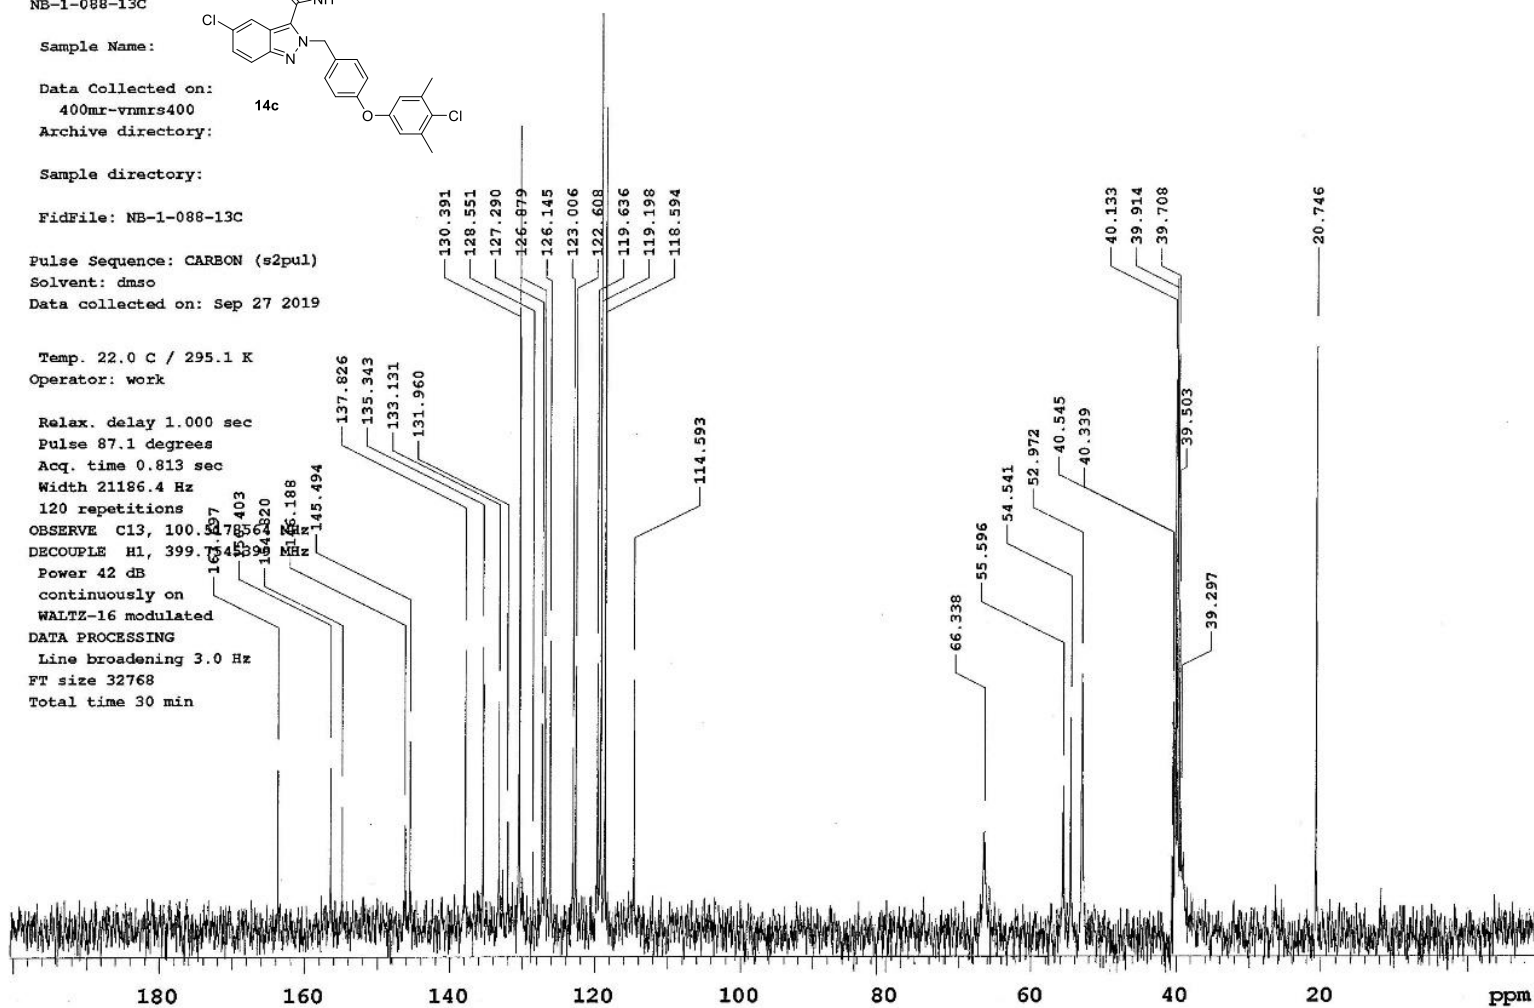



NB-1-089-1H

Sample Name:

Data Collected on:

400mr-vnars400

Archive directory:

Sample directory:

FidFile: PROTON

Pulse Sequence: PROTON (s2pul)

Solvent: dmsc

Data collected on: Jun 13 2018

Temp. 22.0 C / 295.1 K

Operator: work

Relax. delay 3.000 sec

Pulse 79.4 degrees

Acq. time 1.278 sec

Width 6410.3 Hz

32 repetitions

OBSERVE H1, 399.7531748 MHz

DATA PROCESSING

Line broadening 0.5 Hz

FT size 16384

Total time 2 min 17 sec

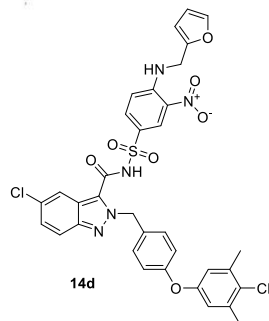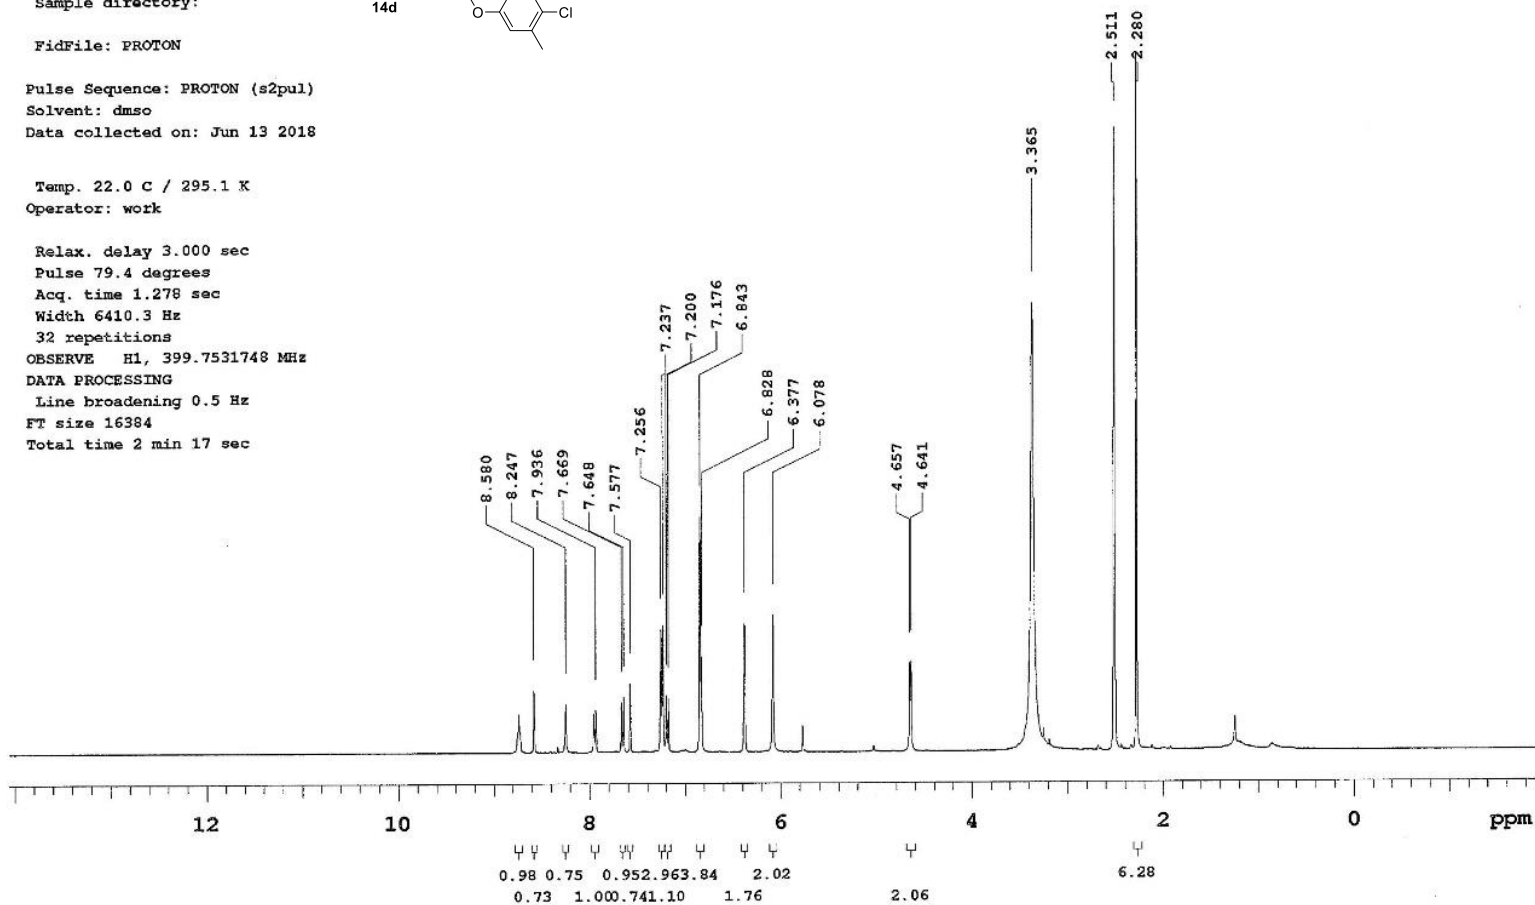

NB-1-089-13C

Sample Name:

Data Collected on:  
400mr-vnmrs400  
Archive directory:

Sample directory:

FidFile: NB-1-089-13C

Pulse Sequence: CARBON (s2pul)  
Solvent: dmso  
Data collected on: Sep 27 2019

Temp. 22.0 C / 295.1 K  
Operator: work

Relax. delay 1.000 sec  
Pulse 87.1 degrees  
Acq. time 0.813 sec  
Width 21186.4 Hz  
192 repetitions  
OBSERVE C13, 100.625 MHz  
DECOUPLE H1, 399.130 MHz  
Power 42 dB  
continuously on  
WALTZ-16 modulated  
DATA PROCESSING  
Line broadening 3.0 Hz  
FT size 32768  
Total time 30 min

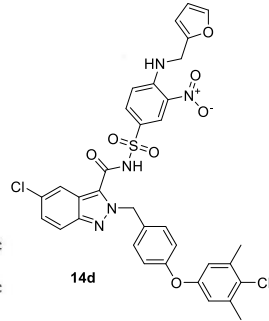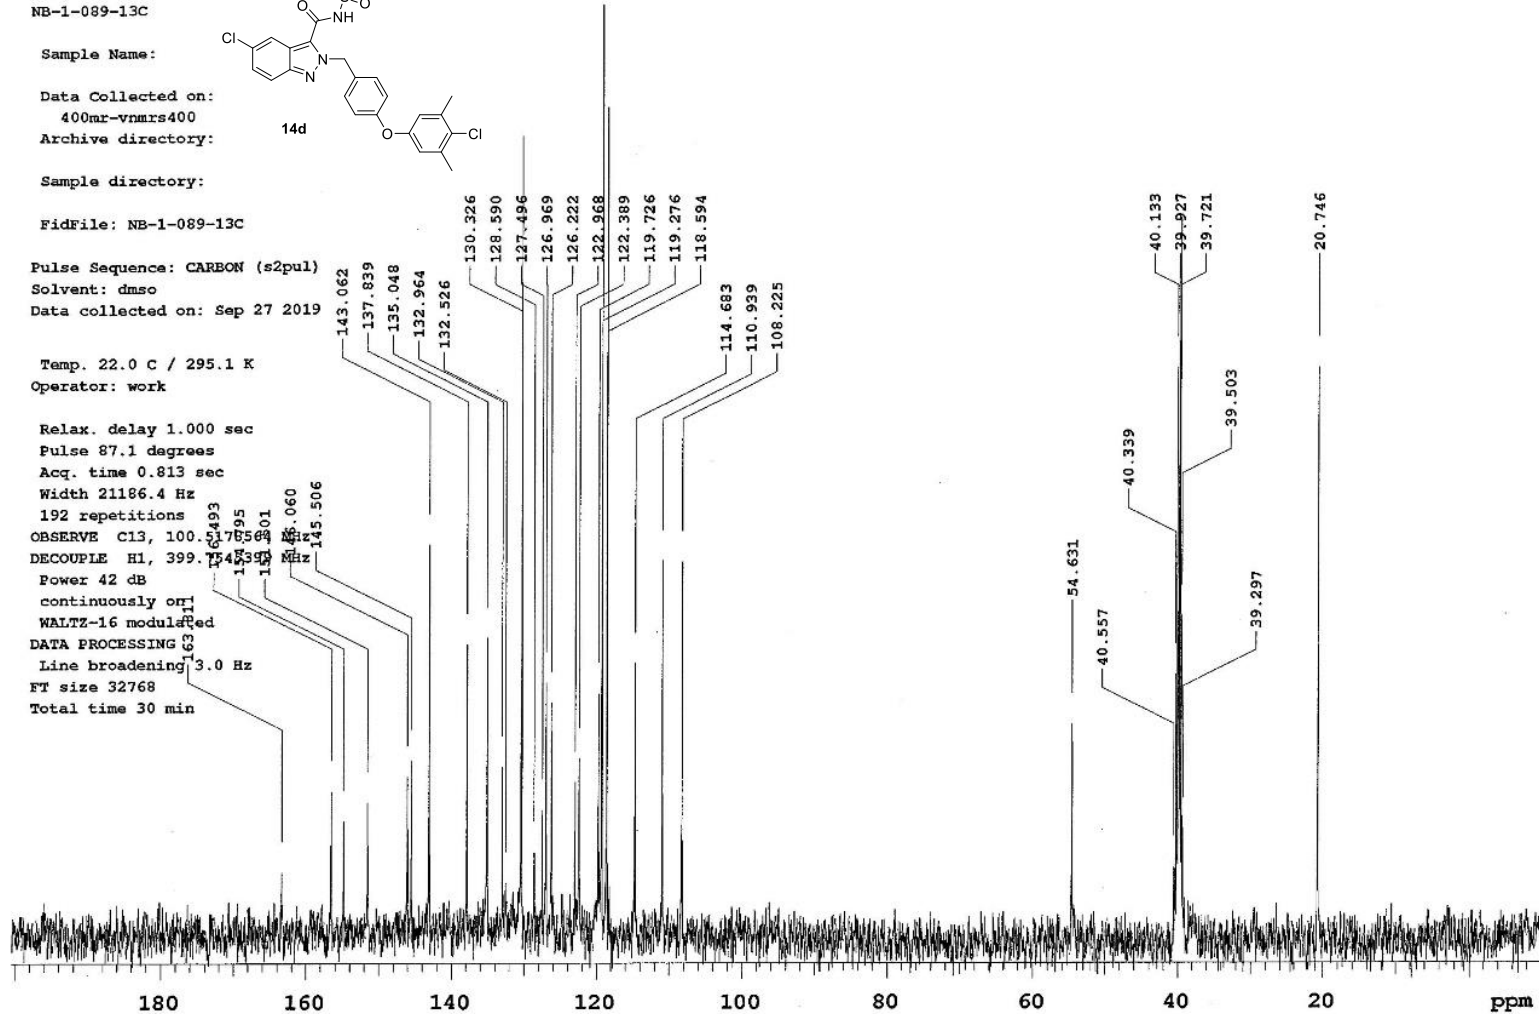

BD-4-117-1H

Sample Name:

Data Collected on:

400mr-vnmrs400

Archive directory:

Sample directory:

FidFile: PROTON

Pulse Sequence: PROTON (s2pul)

Solvent: dmsc

Data collected on: May 15 2019

Temp. 22.0 C / 295.1 K

Operator: work

Relax. delay 5.000 sec

Pulse 79.4 degrees

Acq. time 1.278 sec

Width 6410.3 Hz

24 repetitions

OBSERVE H1, 399.7525233 MHz

DATA PROCESSING

Line broadening 0.5 Hz

FT size 16384

Total time 3 min 21 sec

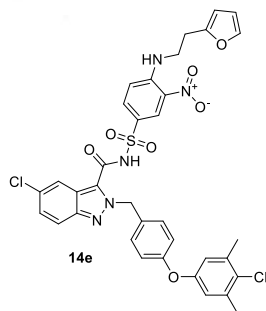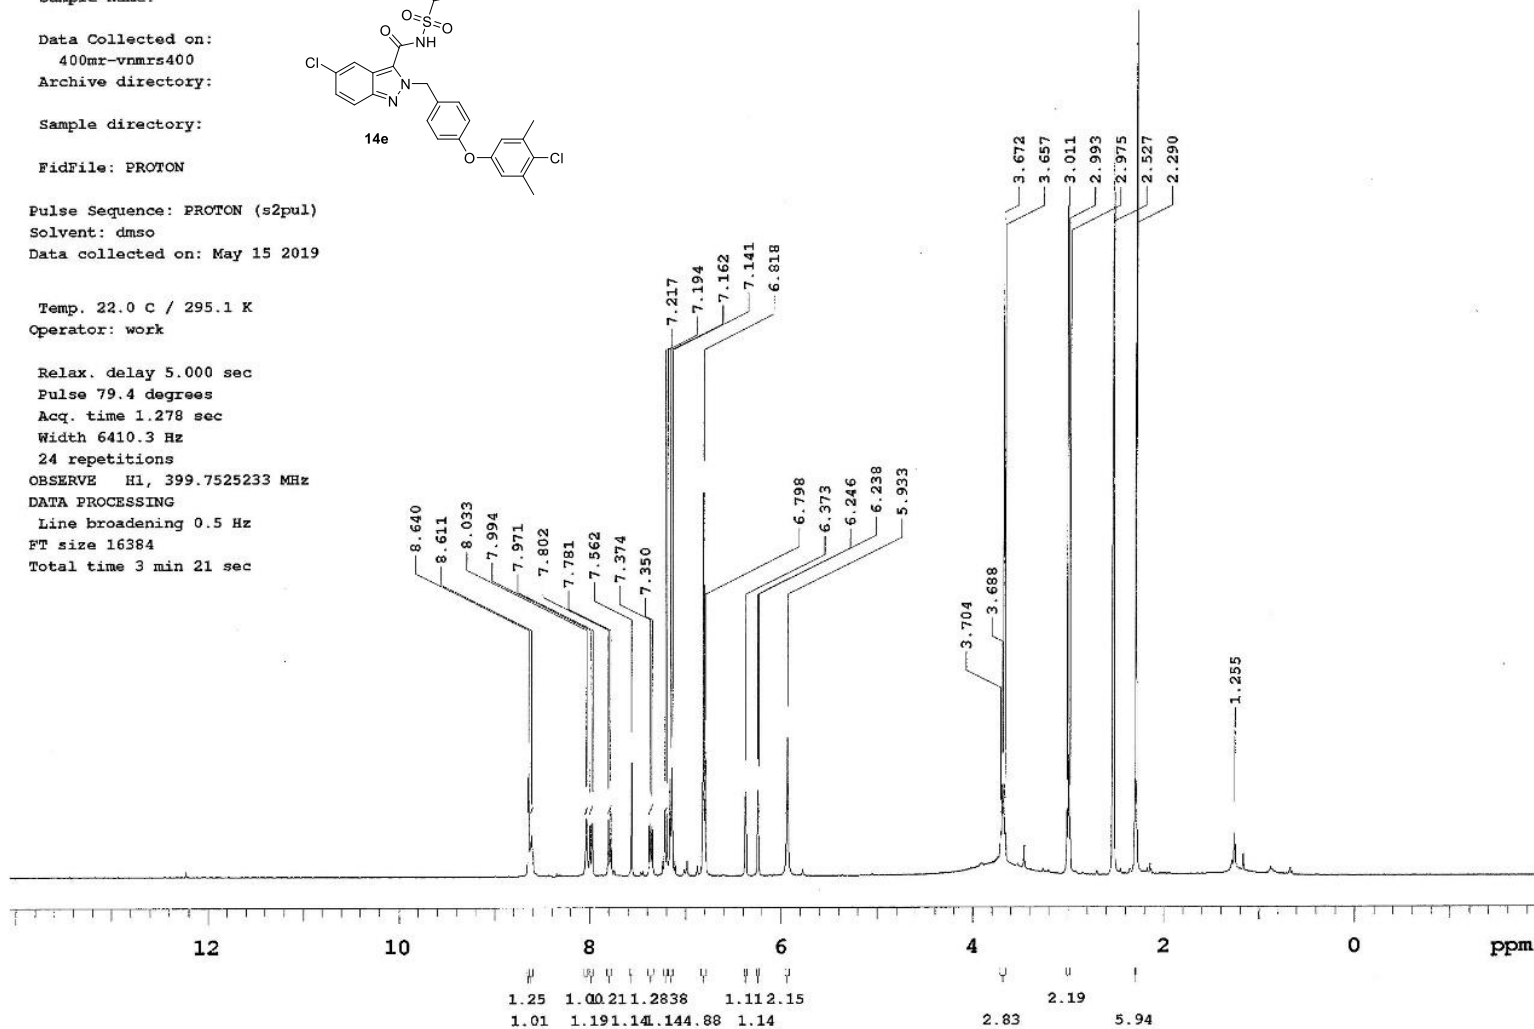

BD-4-117-13C

Sample Name:

Data Collected on:

400mr-vnmrs400

Archive directory:

Sample directory:

FidFile: CARBON

Pulse Sequence: CARBON (s2pul)

Solvent: dmsc

Data collected on: Sep 28 2019

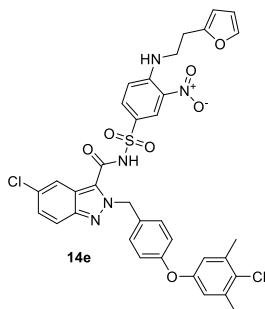

Temp. 22.0 C / 295.1 K  
Operator: work

Relax. delay 1.000 sec  
Pulse 87.1 degrees  
Acq. time 0.813 sec  
Width 21186.4 Hz  
580 repetitions  
OBSERVE C13, 100.5178564 MHz  
DECOUPLE H1, 399.7545399 MHz  
Power 42 dB  
continuously on  
WALTZ-16 modulated  
DATA PROCESSING  
Line broadening 3  
FT size 32768  
Total time 30 min

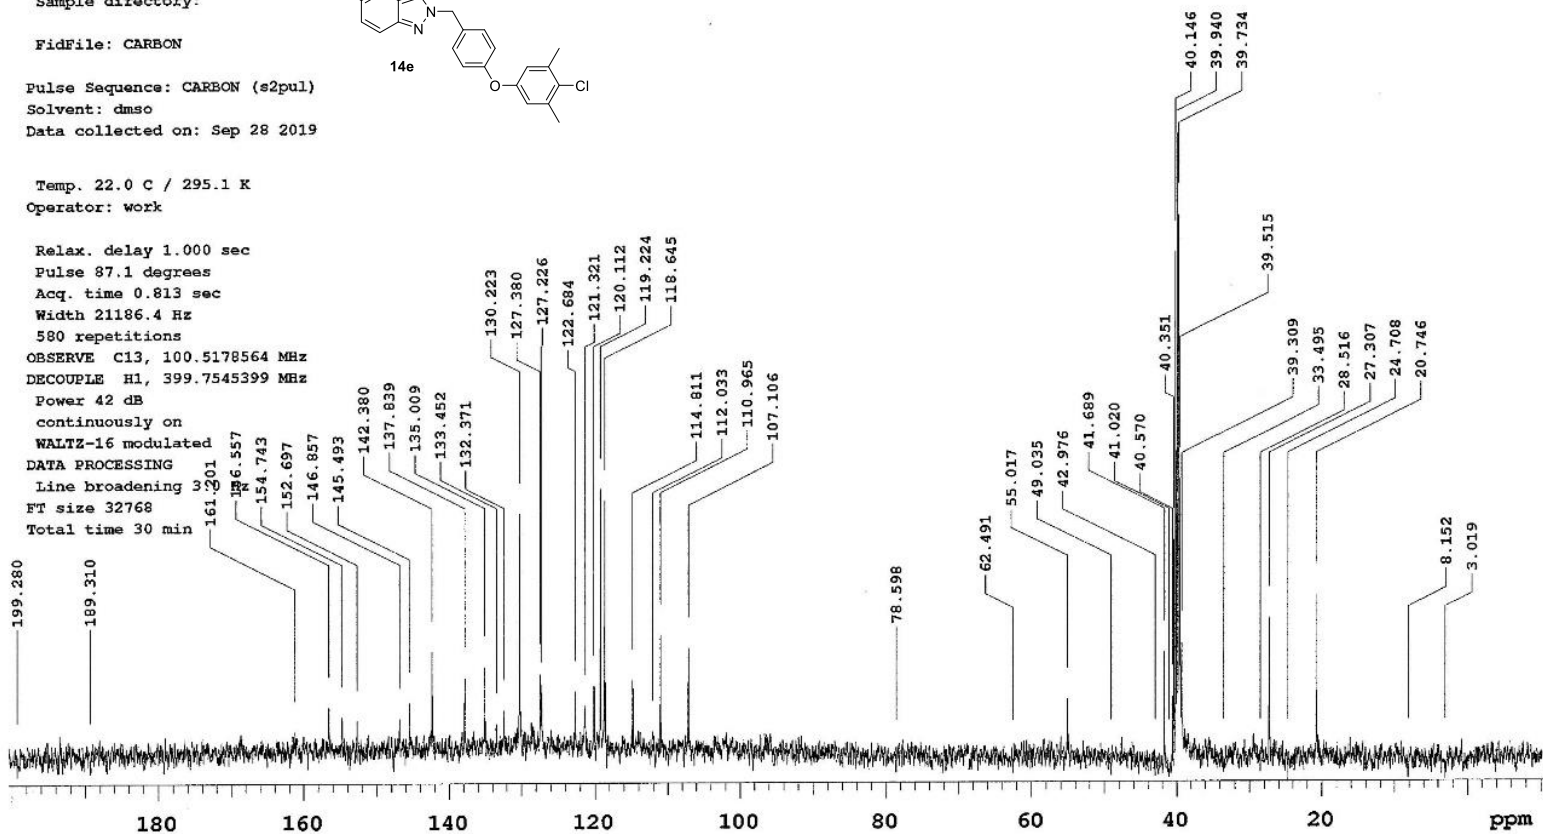

BD-4-123-1H

Sample Name:

Data Collected on:

400mr-vmrs400

Archive directory:

Sample directory:

FidFile: PROTON

Pulse Sequence: PROTON (s2pul)

Solvent: dmsc

Data collected on: May 23 2019

Temp. 22.0 C / 295.1 K

Operator: work

Relax. delay 5.000 sec

Pulse 79.4 degrees

Acq. time 1.278 sec

Width 6410.3 Hz

4 repetitions

OBSERVE H1, 399.7525233 MHz

DATA PROCESSING

Line broadening 0.5 Hz

FT size 16384

Total time 3 min 21 sec

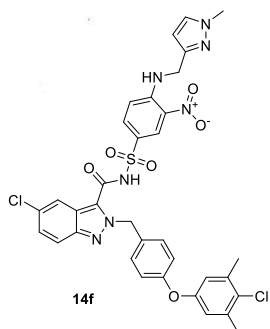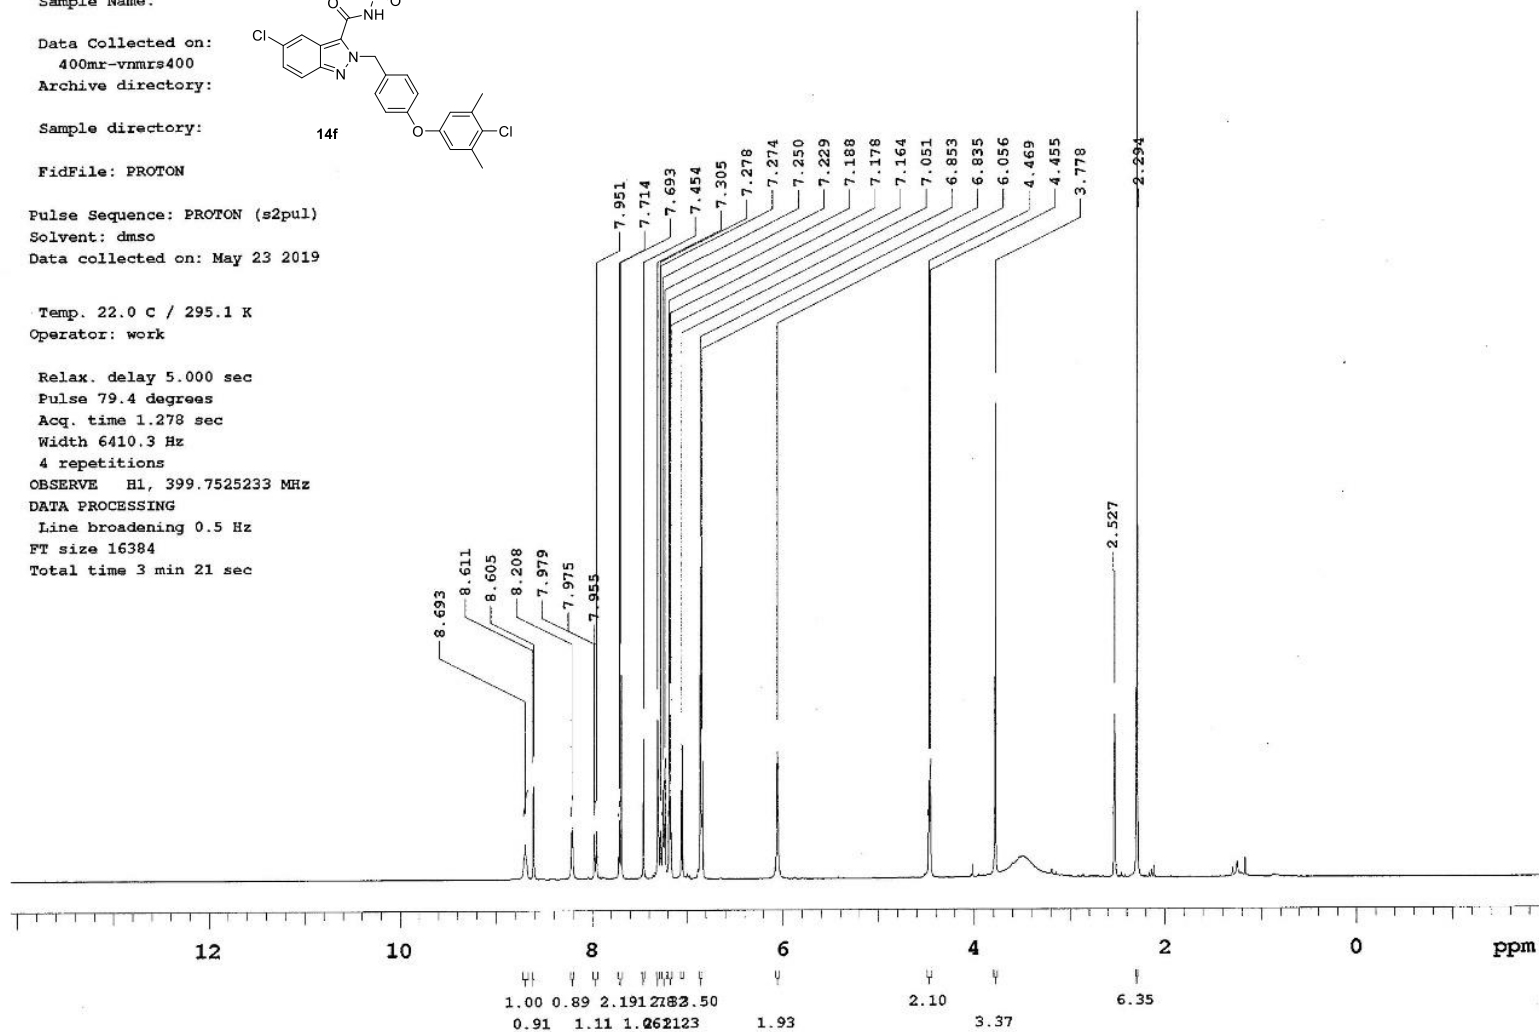

BD-4-12413C

Sample Name:

Data Collected on:

400mr-vmrs400

Archive directory:

Sample directory:

FidFile: CARBON

Pulse Sequence: CARBON (s2pul)

Solvent: dmsc

Data collected on: May 23 2019

Temp. 22.0 C / 295.1 K

Operator: work

Relax. delay 1.000 sec

Pulse 87.1 degrees

Acq. time 0.813 sec

Width 24509.8 Hz

332 repetitions

OBSERVE C13, 100.5178564 MHz

DECOUPLE H1, 399.7545399 MHz

Power 42 dB

continuously on

WALTZ-16 modulated

DATA PROCESSING

Line broadening 3.0 Hz

FT size 32768

Total time 30 min

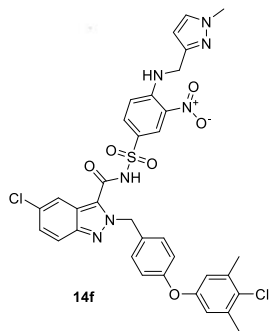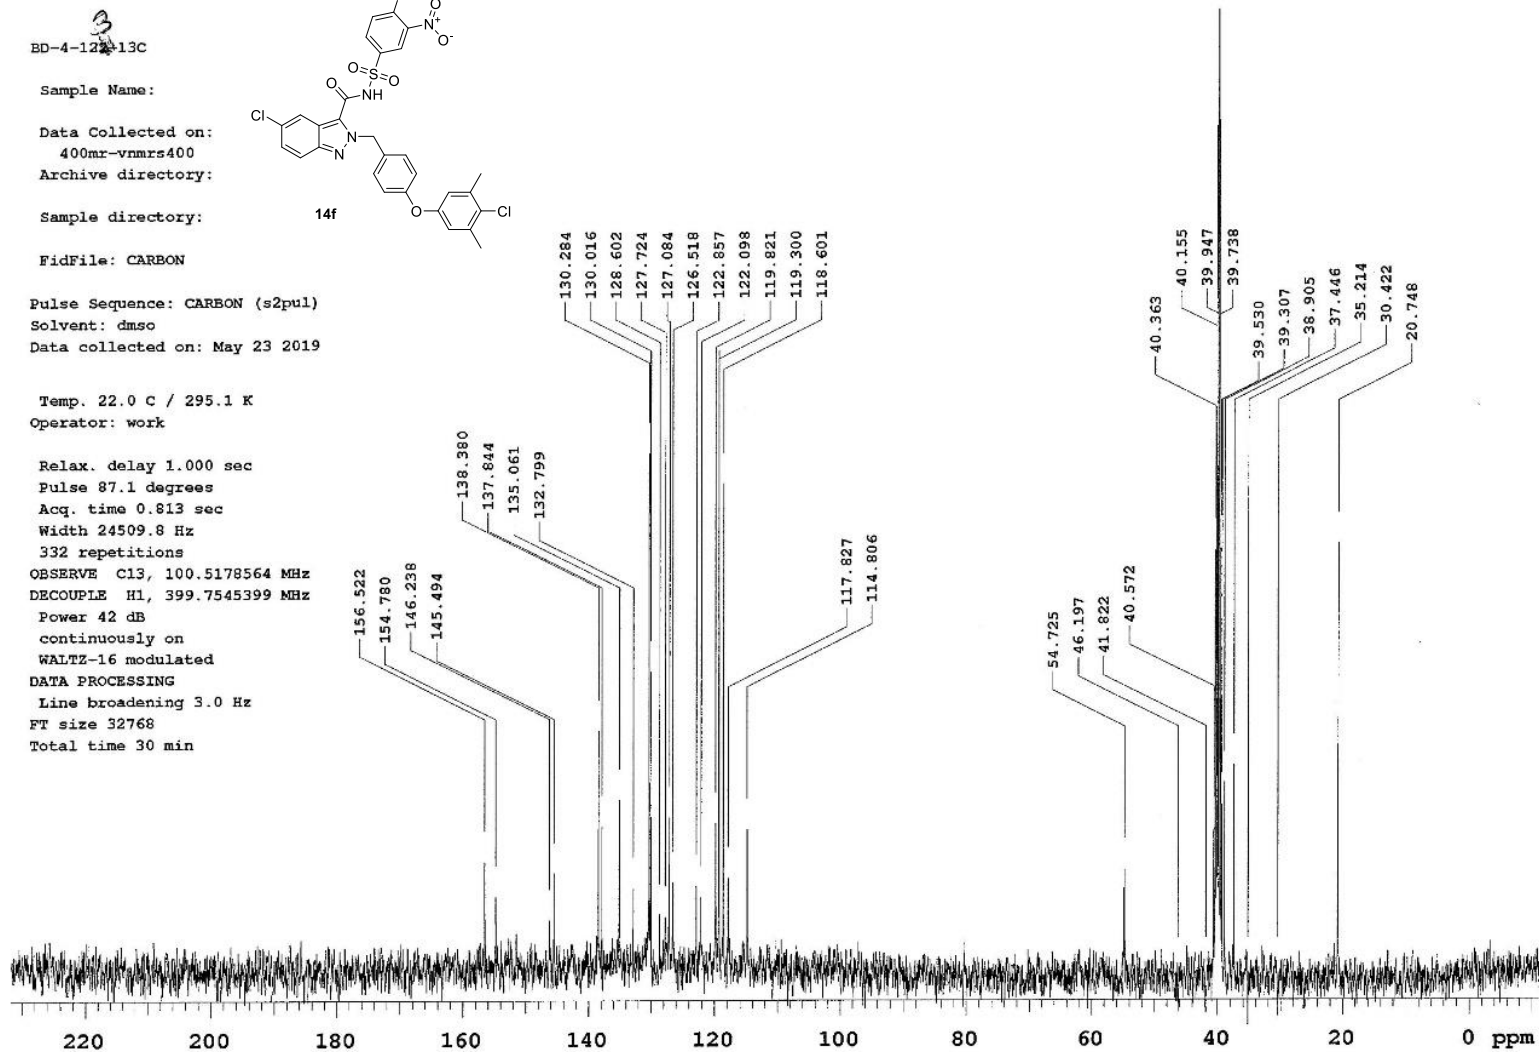

NB-1-087-1H

Sample Name:

Data Collected on:

400mr-vnmrs400

Archive directory:

Sample directory:

FidFile: PROTON

Pulse Sequence: PROTON (s2pul)

Solvent: dmsc

Data collected on: Jun 13 2018

Temp. 22.0 C / 295.1 K

Operator: work

Relax. delay 3.000 sec

Pulse 79.4 degrees

Acq. time 1.278 sec

Width 6410.3 Hz

32 repetitions

OBSERVE H1, 399.7531748 MHz

DATA PROCESSING

Line broadening 0.5 Hz

FT size 16384

Total time 2 min 17 sec

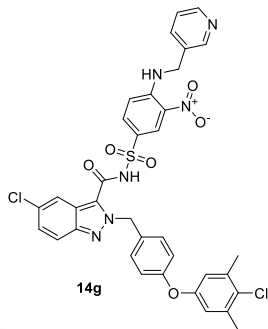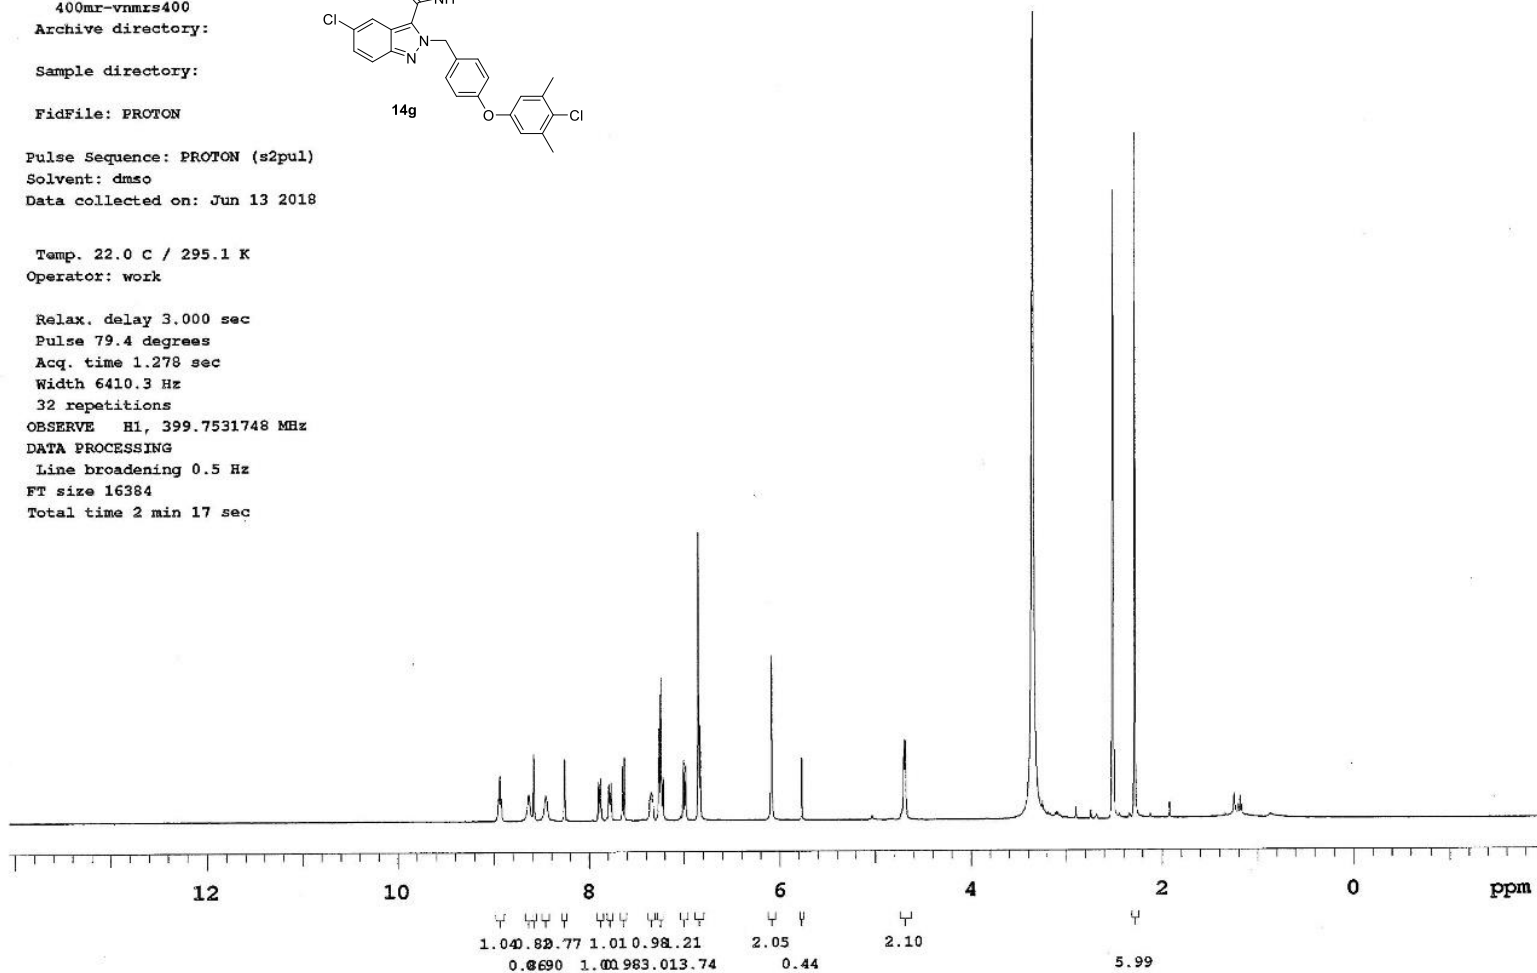

NB-1-087-13C

Sample Name:

Data Collected on:

400mr-vmrs400

Archive directory:

Sample directory:

14g

FidFile: NB-1-087-13C

Pulse Sequence: CARBON (s2pul)

Solvent: dmsc

Data collected on: Sep 27 2019

Temp. 22.0 C / 295.1 K

Operator: work

Relax. delay 1.000 sec

Pulse 87.1 degrees

Acq. time 0.813 sec

Width 21186.4 Hz

144 repetitions

OBSERVE C13, 101.333 MHz

DECOUPLE H1, 399.517 MHz

Power 42 dB

continuously on

WALTZ-16 modulated

DATA PROCESSING

Line broadening 3.0 Hz

FT size 32768

Total time 30 min

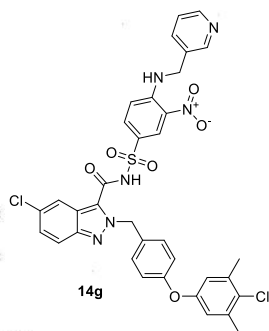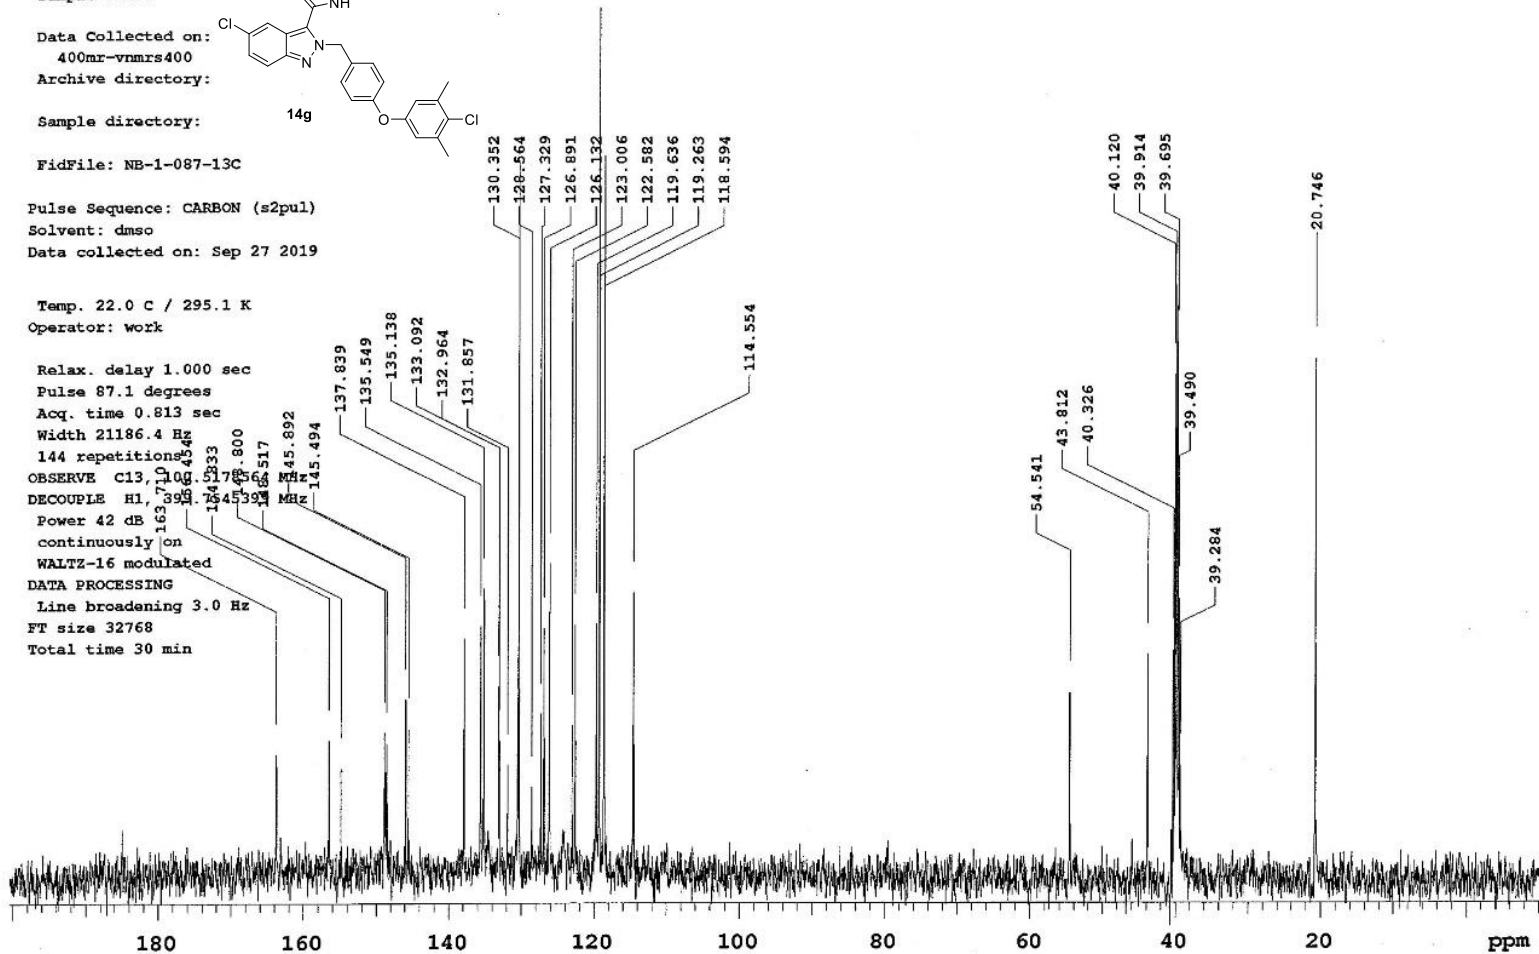



BD-4-127-1R

Sample Name:

Data Collected on:

400mr-vmrns400

Archive directory:

Sample directory:

FidFile: PROTON

Pulse Sequence: PROTON (s2pul)

Solvent: dmsc

Data collected on: May 30 2019

Temp. 22.0 C / 295.1 K

Operator: work

Relax. delay 5.000 sec

Pulse 79.4 degrees

Acq. time 1.278 sec

Width 6410.3 Hz

8 repetitions

OBSERVE H1, 399.7525233

DATA PROCESSING

Line broadening 0.5 Hz

FT size 16384

Total time 3 min 21 sec

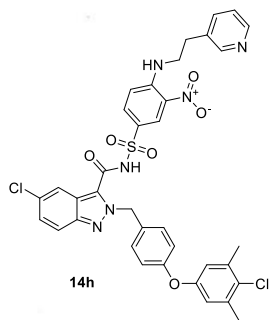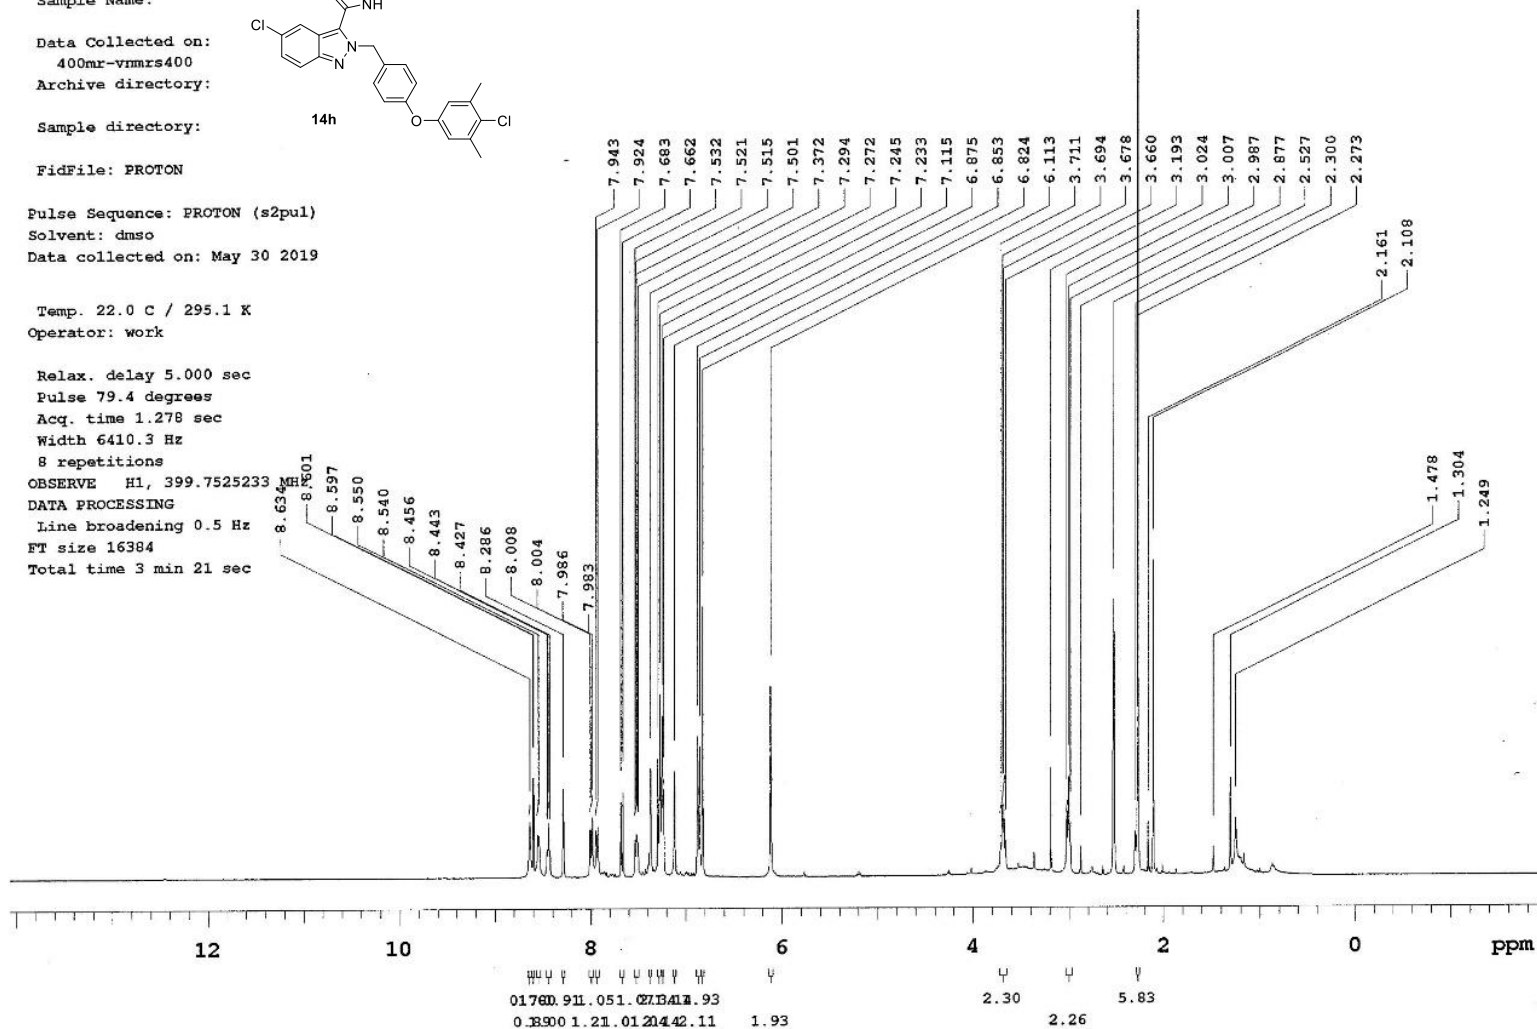

BD-4-127-13C

Sample Name:

Data Collected on:

400mr-vnmrs400

Archive directory:

Sample directory:

FidFile: CARBON

Pulse Sequence: CARBON (s2pul)

Solvent: cdcl3

Data collected on: May 30 2019

Temp. 22.0 C / 295.1 K

Operator: work

Relax. delay 1.000 sec

Pulse 87.1 degrees

Acq. time 0.813 sec

Width 24509.8 Hz

368 repetitions

OBSERVE c13, 100.5173790 MHz

DECOUPLE H1, 399.7526411 MHz

Power 42 dB

continuously on

WALTZ-16 modulated

DATA PROCESSING

Line broadening 3.0 Hz

FT size 32768

Total time 30 min

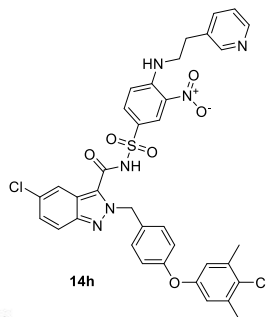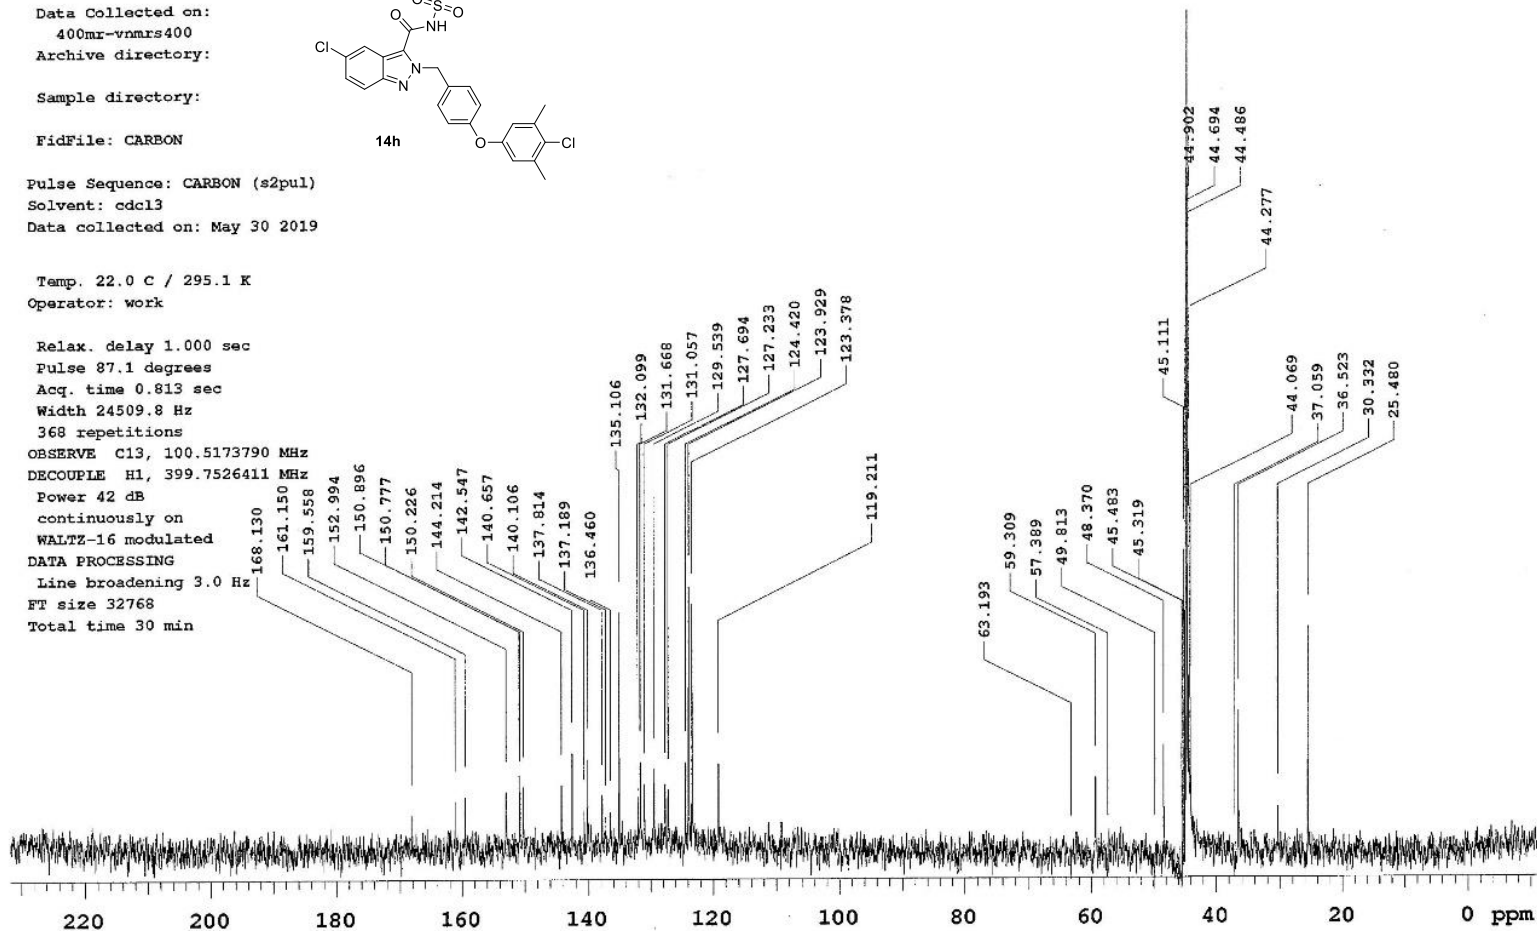

BD-4-098-1H

Sample Name:

Data Collected on:

400mr-vmrs400

Archive directory:

Sample directory:

FidFile: PROTON

Pulse Sequence: PROTON (s2pul)

Solvent: dmsc

Data collected on: Apr 21 2019

Temp. 22.0 C / 295.1 K

Operator: work

Relax. delay 5.000 sec

Pulse 79.4 degrees

Acq. time 1.278 sec

Width 6410.3 Hz

32 repetitions

OBSERVE H1, 399.7525233 MHz

DATA PROCESSING

Line broadening 0.5 Hz

FT size 16384

Total time 3 min 21 sec

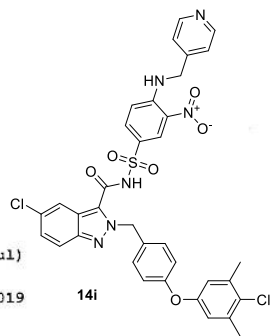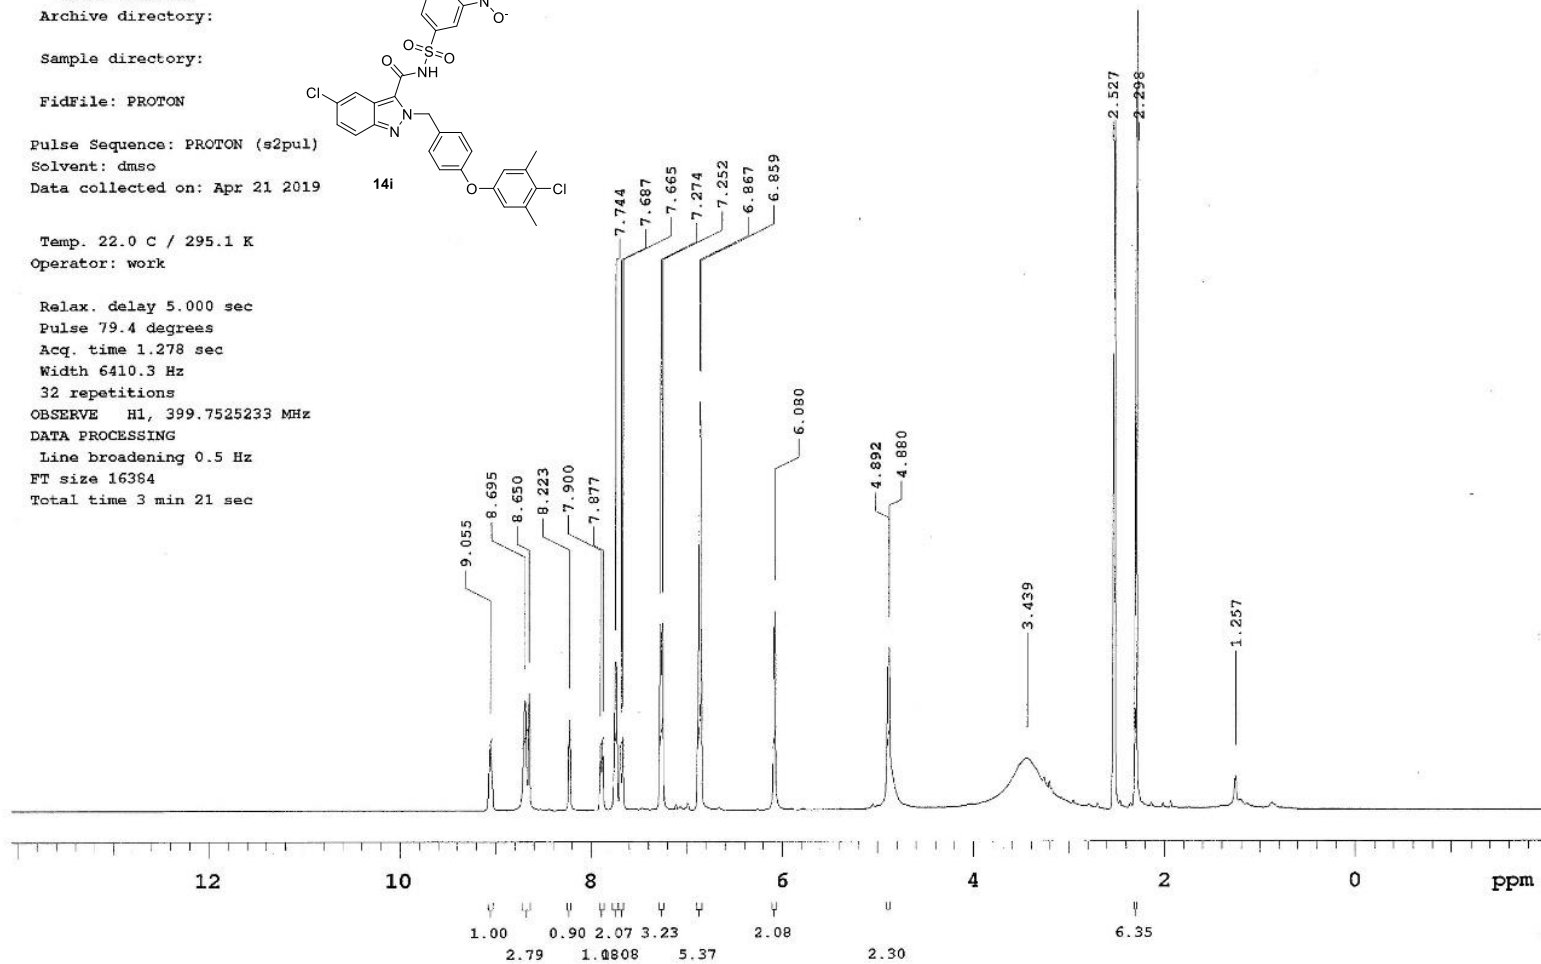

BD-4-098-13C

Sample Name:

Data Collected on:

400mr-vnmrs400

Archive directory:

Sample directory:

FidFile: CARBON

Pulse Sequence: CARBON (s2pul)

Solvent: dmsc

Data collected on: Sep 28 2019

Temp. 22.0 C / 295.1 K

Operator: work

Relax. delay 1.000 sec

Pulse 87.1 degrees

Acq. time 0.813 sec

Width 21186.4 Hz

136 repetitions

OBSERVE C13 100.625178564 MHz

DECOUPLE H1 399.7545399 MHz

Power 42 dB

continuously on

WALTZ-16 modulated

DATA PROCESSING

Line broadening 3.0 Hz

FT size 32768

Total time 30 min

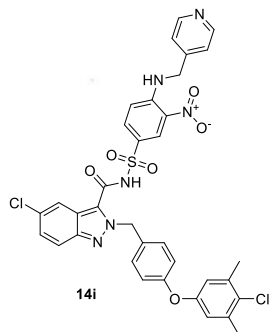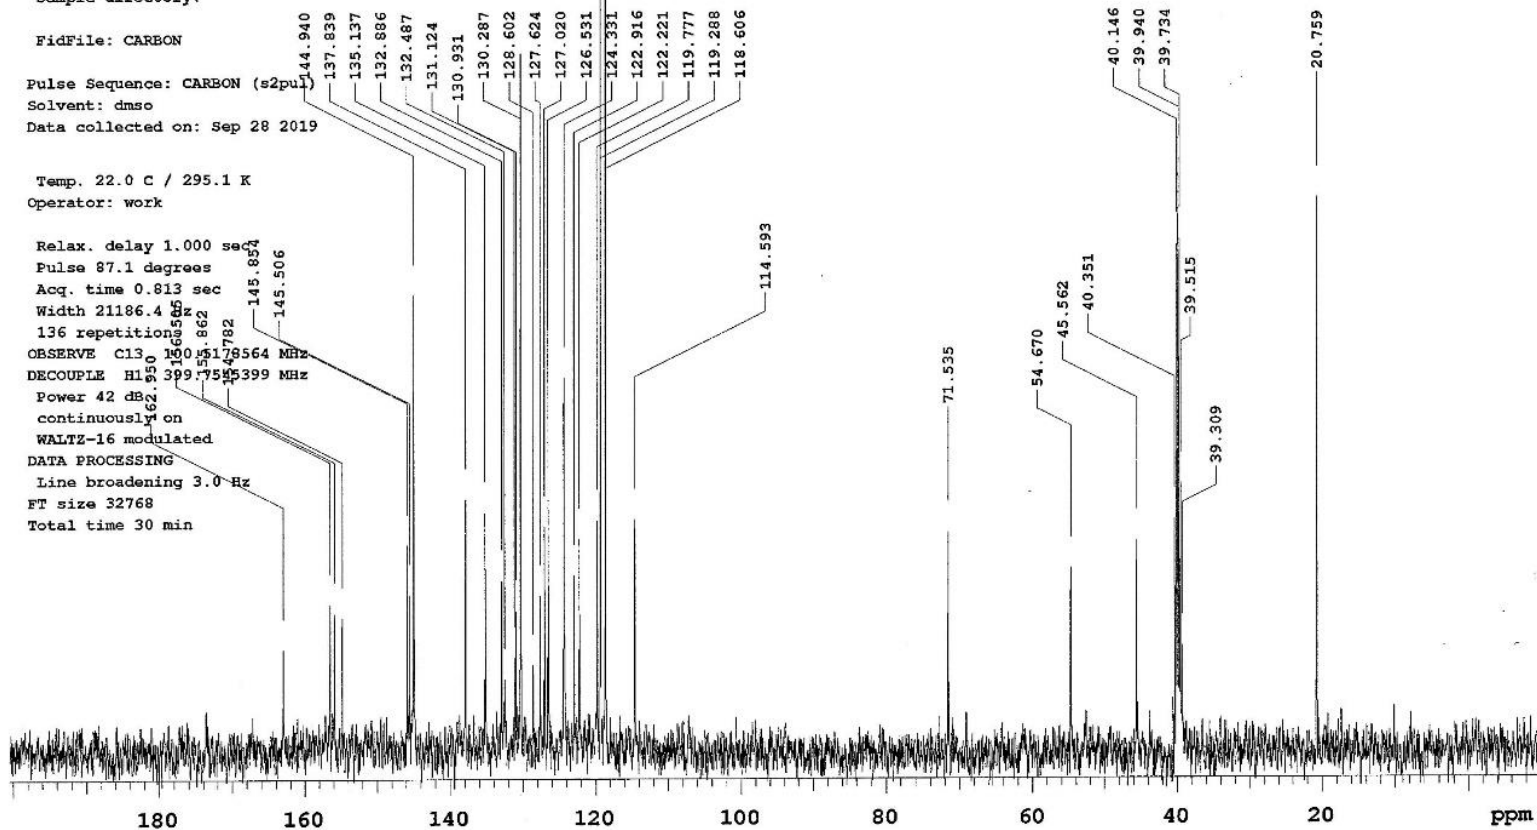

BD-4-110-1H

Sample Name:

Data Collected on:

400mr-vnmrs400

Archive directory:

Sample directory:

FidFile: PROTON

Pulse Sequence: PROTON (s2pul)

Solvent: dmsc

Data collected on: May 8 2019

Temp. 22.0 C / 295.1 K

Operator: work

Relax. delay 5.000 sec

Pulse 79.4 degrees

Acq. time 1.278 sec

Width 6410.3 Hz

32 repetitions

OBSERVE H1, 399.7525233 MHz

DATA PROCESSING

Line broadening 0.5 Hz

FT size 16384

Total time 3 min 21 sec

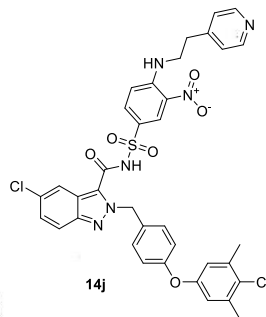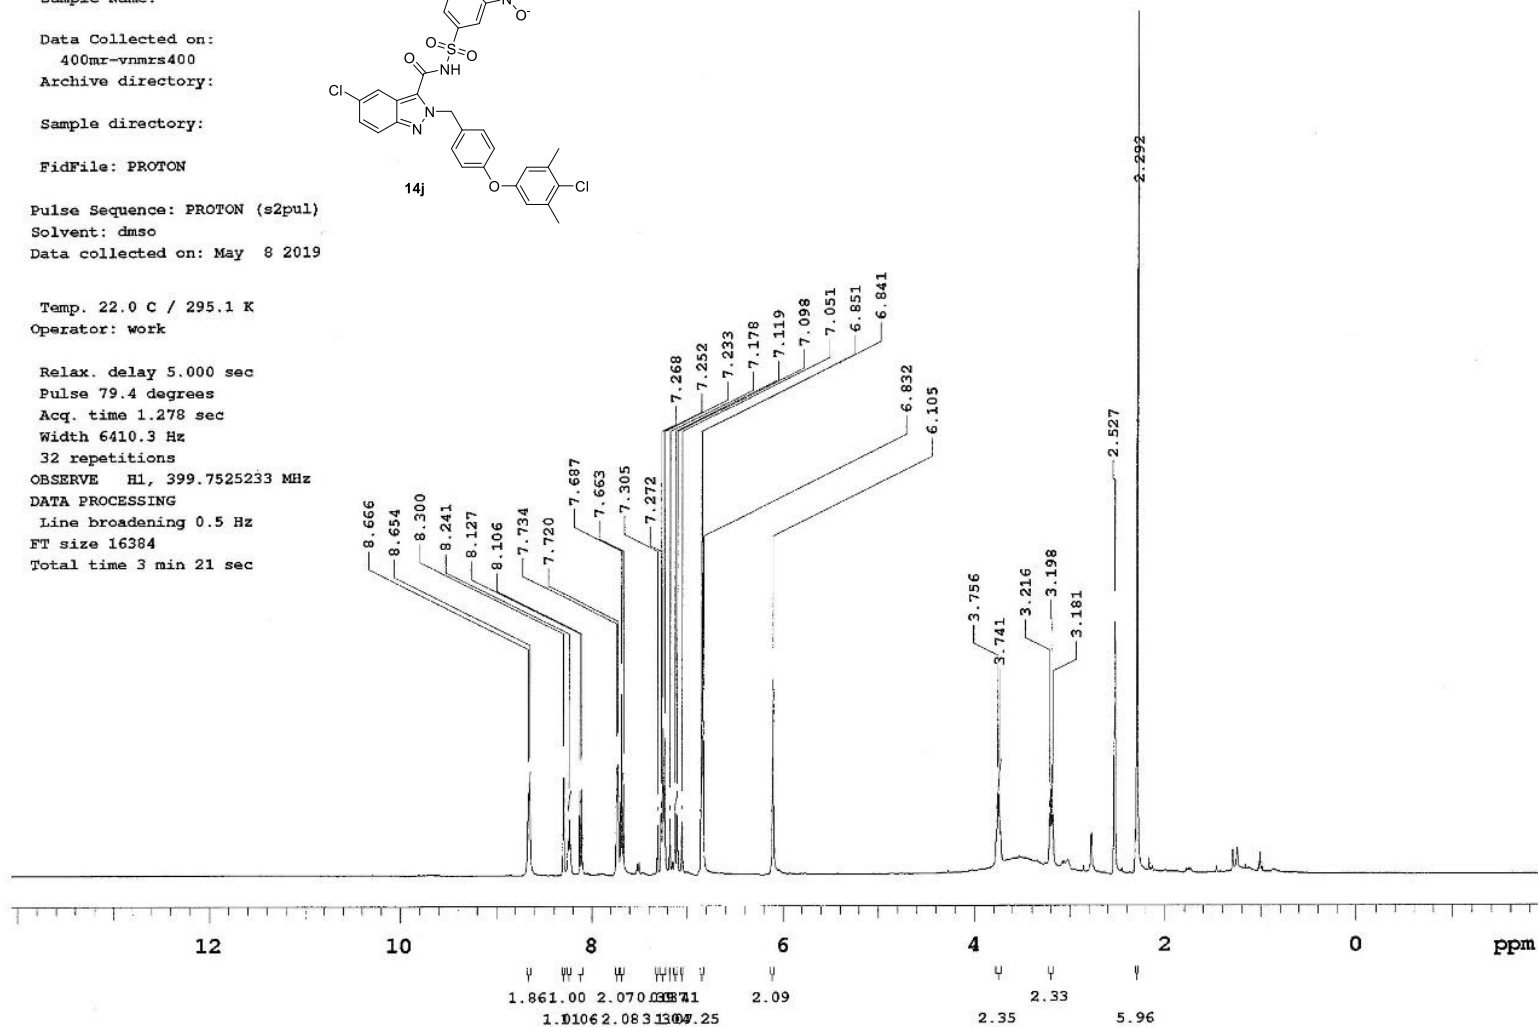

BD-4-110-13C

Sample Name:  
DL7122C  
Data Collected on:  
400mr-vnmrs400  
Archive directory:

Sample directory:

FidFile: CARBON

Pulse Sequence: CARBON (s2pul)  
Solvent: cdcl3  
Data collected on: May 8 2019

Temp. 22.0 C / 295.1 K  
Operator: work

Relax. delay 1.000 sec  
Pulse 87.1 degrees  
Acq. time 0.813 sec  
Width 24509.8 Hz  
368 repetitions  
OBSERVE C13, 100.5173790 MHz  
DECOUPLE H1, 399.7526411 MHz  
Power 42 dB  
continuously on  
WALTZ-16 modulated  
DATA PROCESSING  
Line broadening 3.0 Hz  
FT size 32768  
Total time 30 min

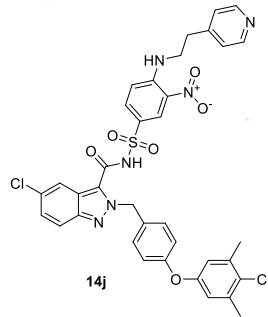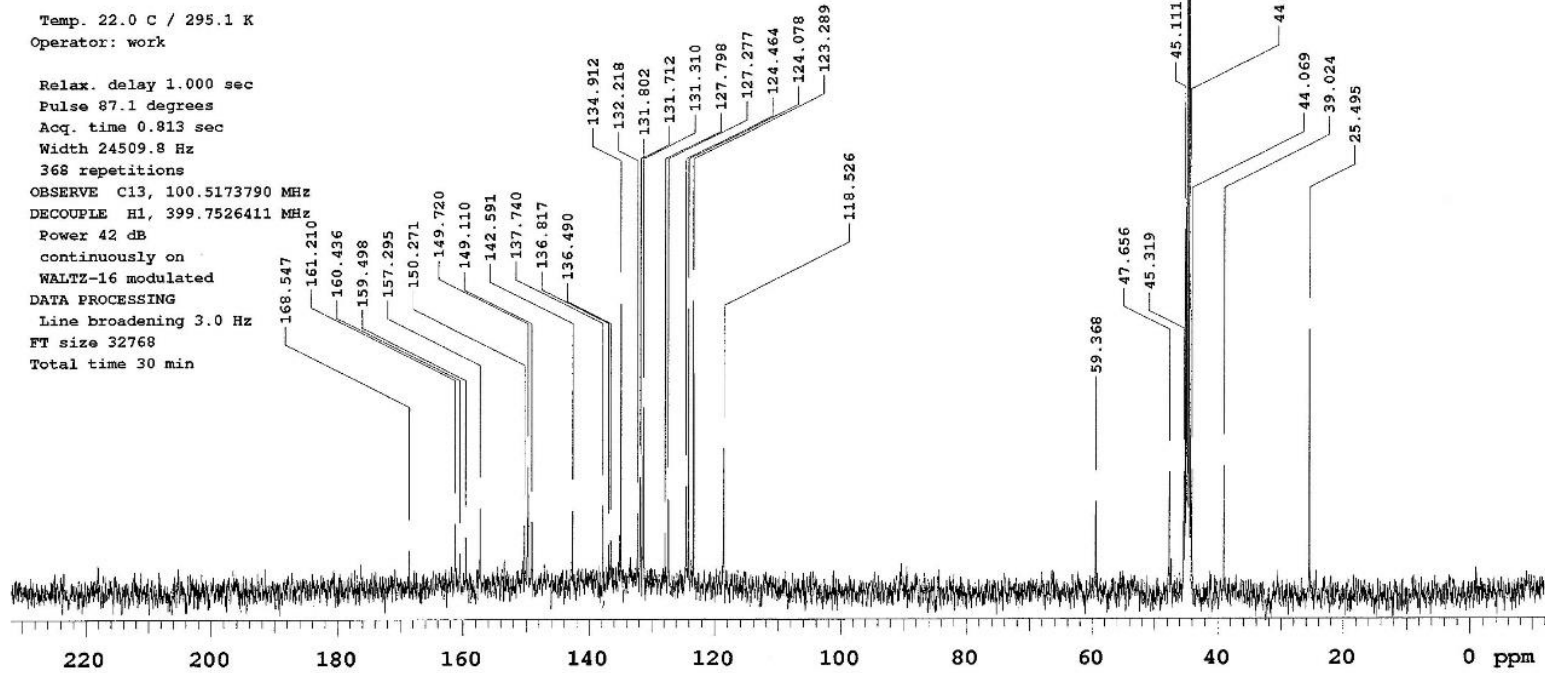

CG-1-016-1H

Sample Name:

Data Collected on:

400mr-vnars400

Archive directory:

Sample directory:

FidFile: PROTON

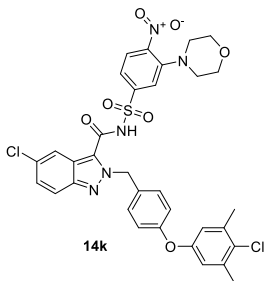

Pulse Sequence: PROTON (s2pul)

Solvent: dmsc

Data collected on: Aug 19 2018

Temp. 20.0 C / 293.1 K

Operator: work

Relax. delay 5.000 sec

Pulse 79.4 degrees

Acq. time 1.278 sec

Width 6410.3 Hz

28 repetitions

OBSERVE H1, 399.7531748 MHz

DATA PROCESSING

Line broadening 0.5 Hz

FT size 16384

Total time 3 min 21 sec

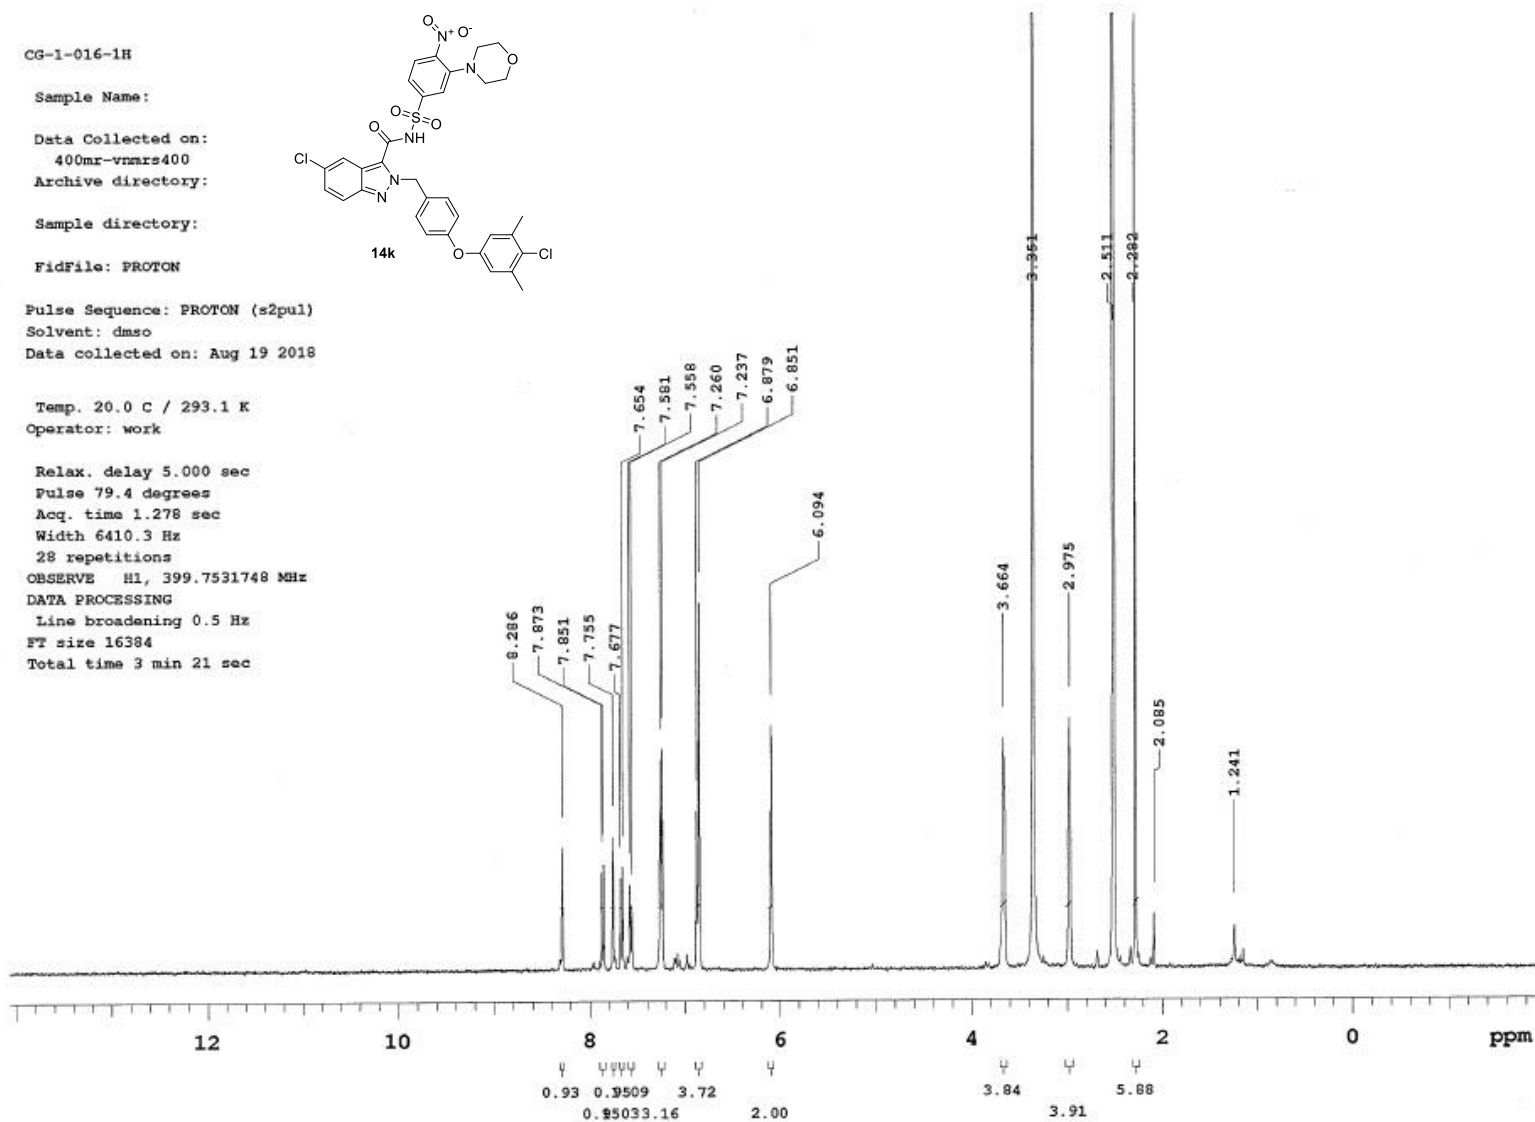

CG-1-016-13C

Sample Name:

Data Collected on:

400mr-vnmrs400

Archive directory:

14k

Sample directory:

FidFile: CG-1-016-13C

Pulse Sequence: CARBON (s2pul)

Solvent: dmsc

Data collected on: Sep 28 2019

Temp. 22.0 C / 295.1 K

Operator: work

Relax. delay 1.000 sec

Pulse 87.1 degrees

Acq. time 0.813 sec

Width 21186.4 Hz

136 repetitions

OBSERVE C13, 100.625 MHz

DECOUPLE H1, 399.615 MHz

Power 42 dB

continuously modulated

WALTZ-16 modulated

DATA PROCESSING

Line broadening 3.0 Hz

FT size 32768

Total time 30 min

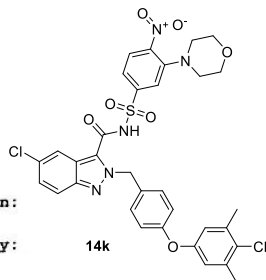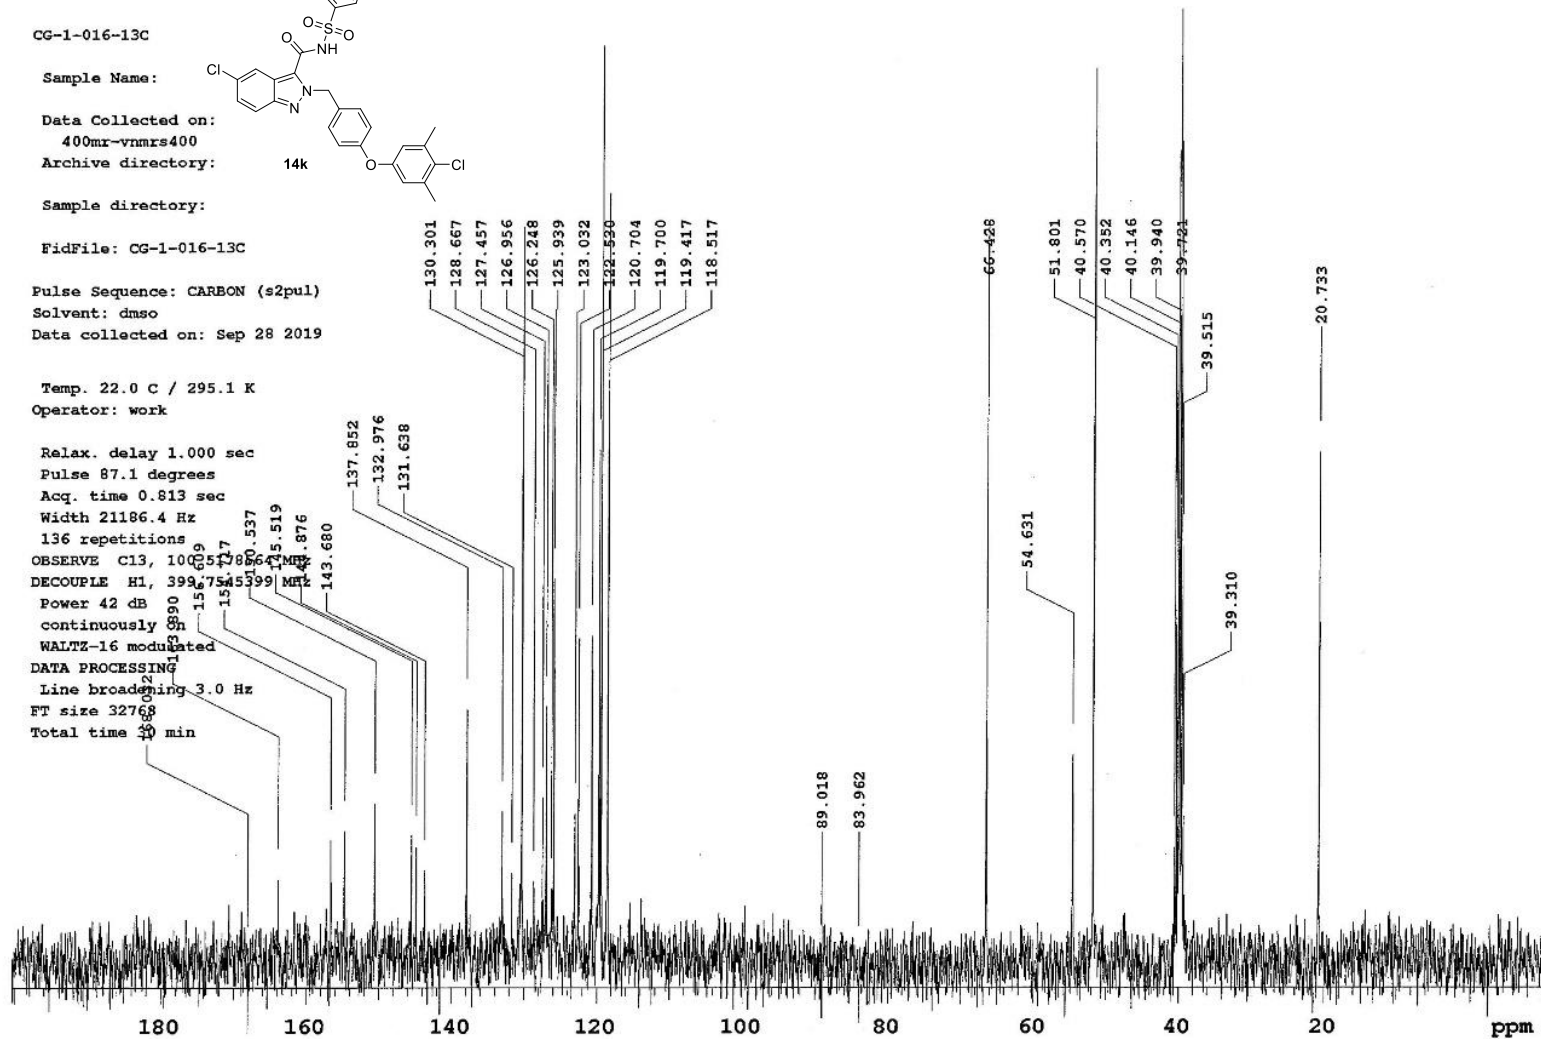



CG-1-019-1H

Sample Name:

Data Collected on:

400mr-vmrs400

Archive directory:

Sample directory:

FidFile: PROTON

Pulse Sequence: PROTON (s2pul)

Solvent: dms0

Data collected on: Aug 19 2018

Temp. 22.0 C / 295.1 K

Operator: work

Relax. delay 5.000 sec

Pulse 79.4 degrees

Acq. time 1.278 sec

Width 6410.3 Hz

24 repetitions

OBSERVE H1, 399.7531748 MHz

DATA PROCESSING

Line broadening 0.5 Hz

FT size 16384

Total time 3 min 21 sec

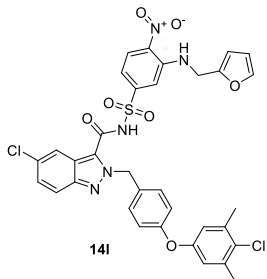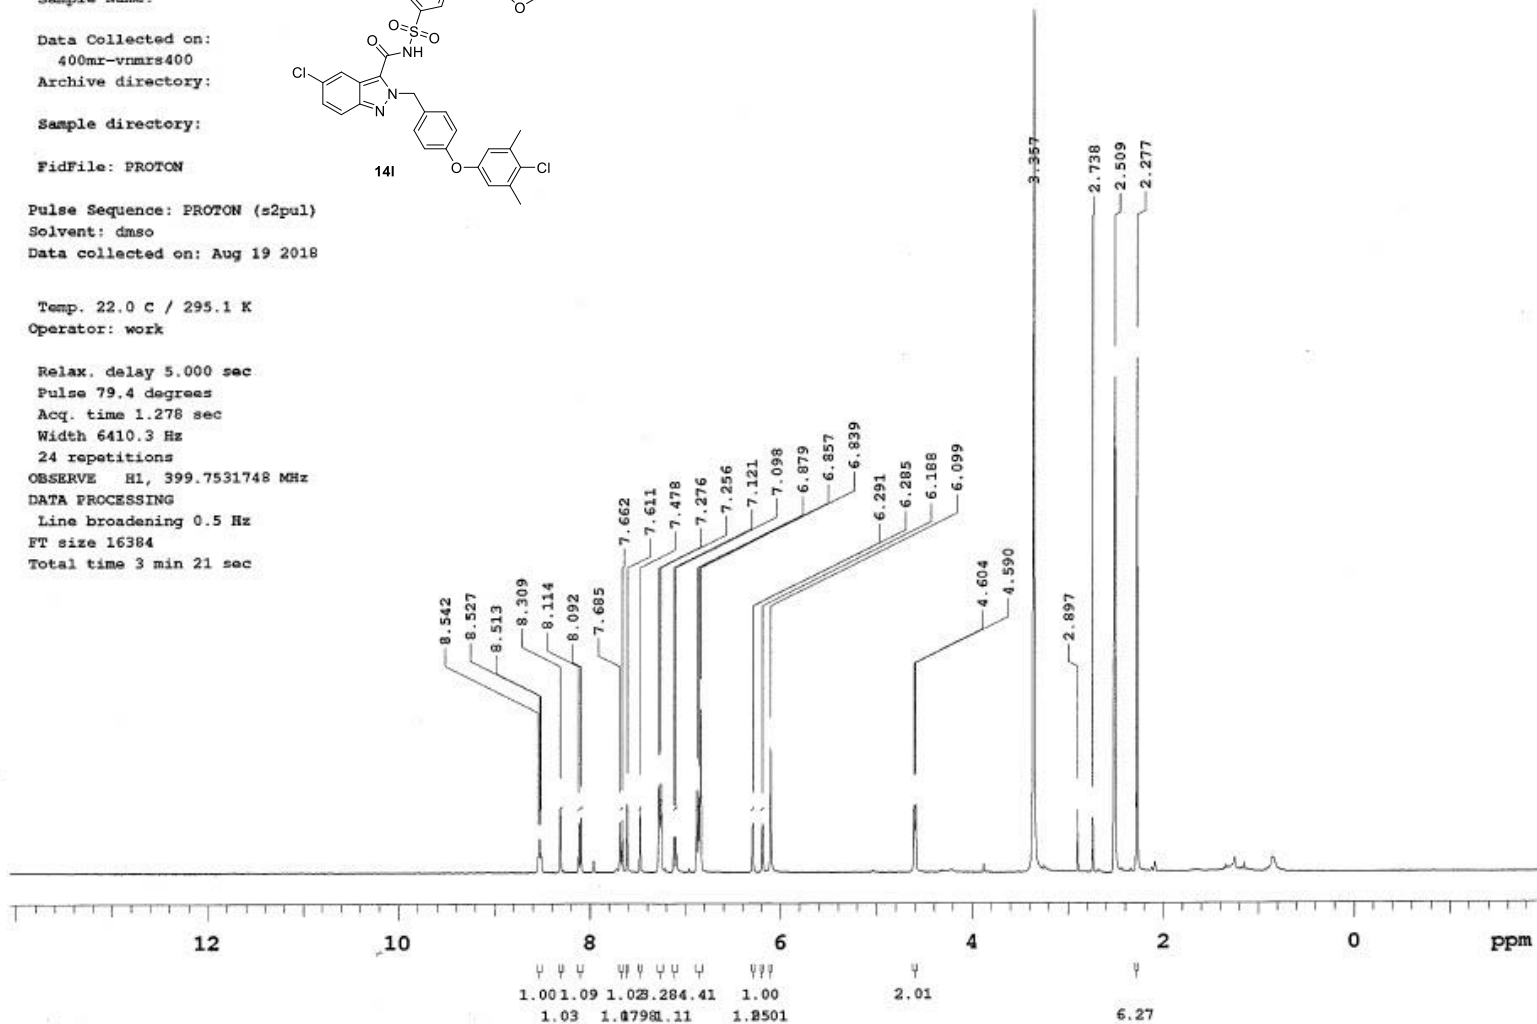

CG-1-019-13C

Sample Name:

Data Collected on:

400mr-vnmrs400

Archive directory:

Sample directory:

FidFile: CG-1-019-13C

Pulse Sequence: CARBON (s2pul)

Solvent: dmsc

Data collected on: Sep 28 2019

Temp. 22.0 C / 295.1 K

Operator: work

Relax. delay 1.000 sec

Pulse 87.1 degrees

Acq. time 0.813 sec

Width 21186.4 Hz

108 repetitions

OBSERVE C13, 101.62438 MHz

DECOUPLE H1, 139.7545359 MHz

Power 42 dB

continuously on

WALTZ-16 modulated

DATA PROCESSING

Line broadening 3.0 Hz

FT size 32768

Total time 30 min

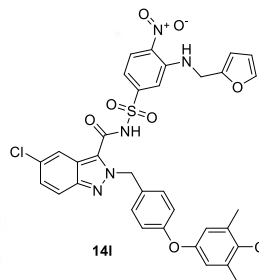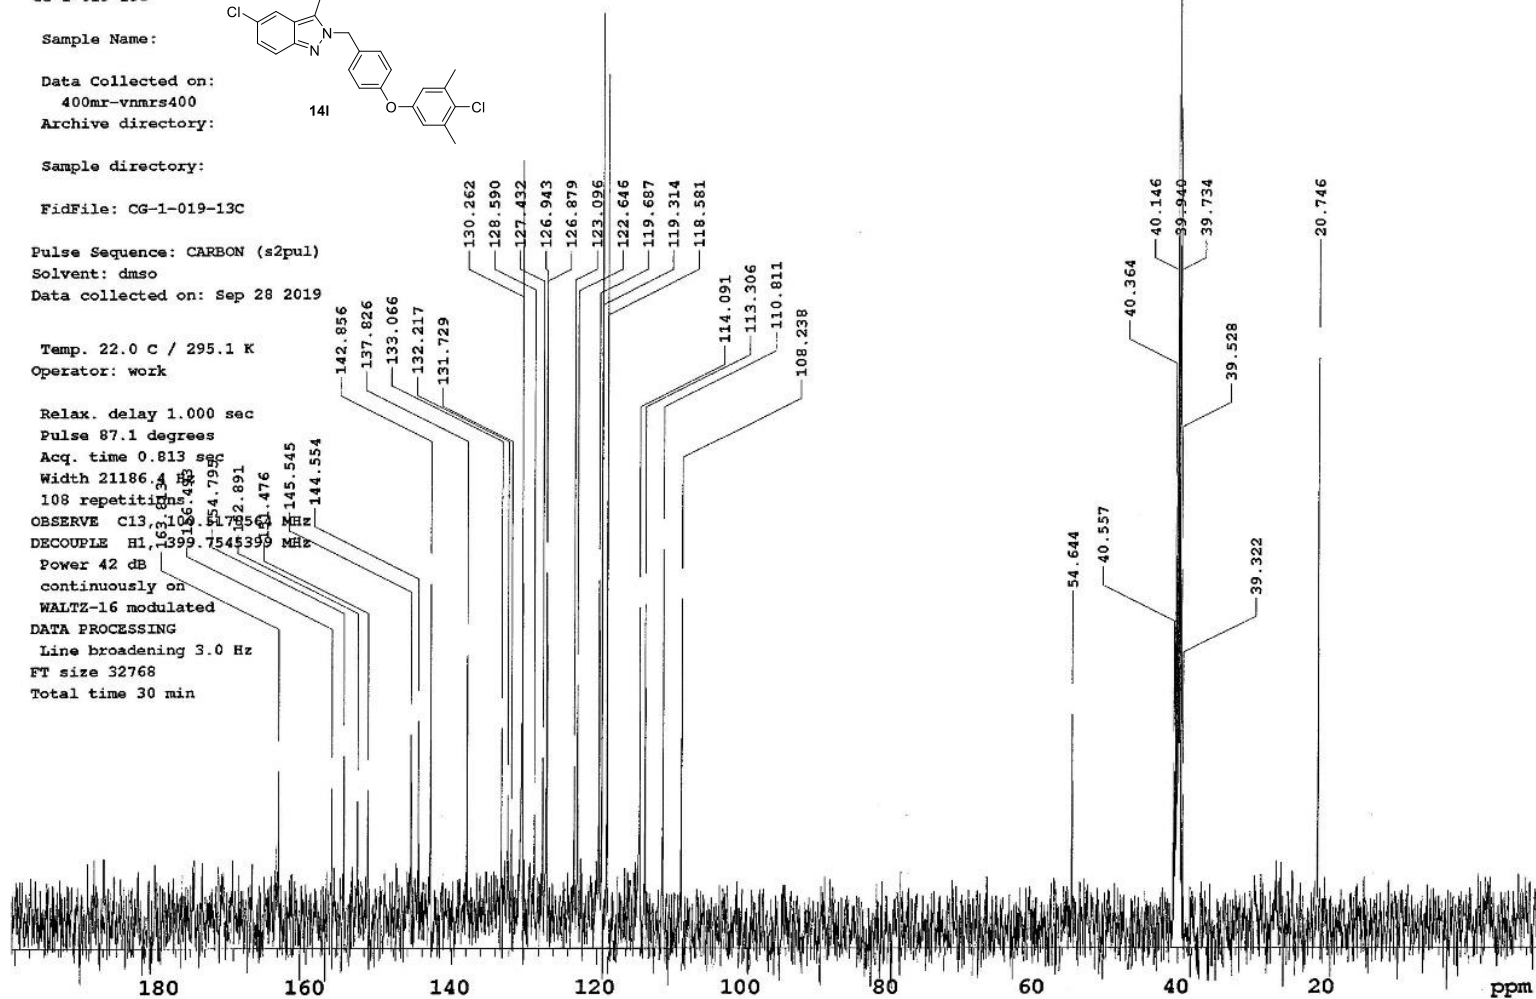

BD-4-116-1B

Sample Name:

Data Collected on:  
400mr-vnmrs400

Archive directory:

Sample directory:

FidFile: PROTON

Pulse Sequence: PROTON (s2pul)  
Solvent: dmsc  
Data collected on: May 15 2019

Temp. 22.0 C / 295.1 K  
Operator: work

Relax. delay 5.000 sec  
Pulse 79.4 degrees  
Acq. time 1.278 sec  
Width 6410.3 Hz  
32 repetitions  
OBSERVE H1, 399.7525233 MHz  
DATA PROCESSING  
Line broadening 0.5 Hz  
FT size 16384  
Total time 3 min 21 sec

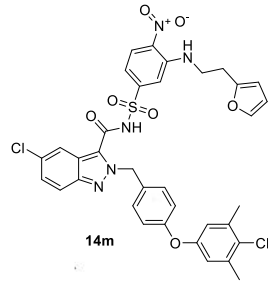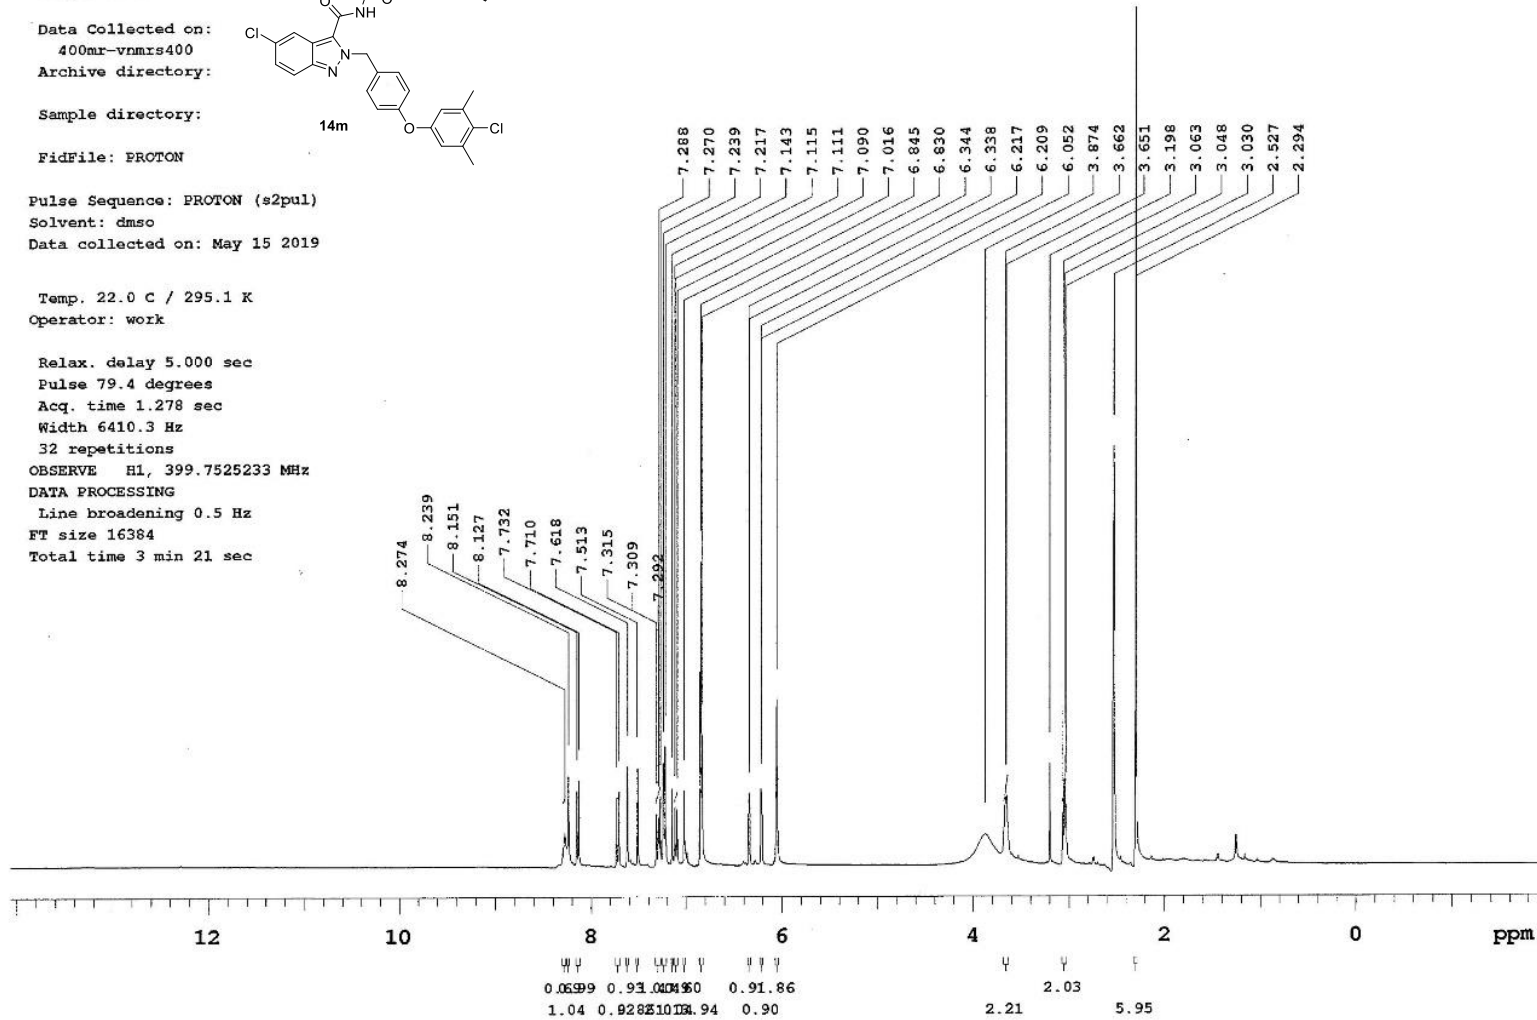

BD-4-116-13C

Sample Name:

Data Collected on:

400mr-vnmrs400

Archive directory:

Sample directory:

FidFile: CARBON

Pulse Sequence: CARBON (s2pul)

Solvent: DMSO

Data collected on: Mar 3 2022

Temp. 25.0 C / 298.1 K

Operator: work

Relax. delay 1.000 sec

Pulse 67.7 degrees

Acq. time 0.813 sec

Width 21186.4 Hz

380 repetitions

OBSERVE C13, 100.625 MHz

DECOUPLE H1, 399.754539 MHz

Power 39 dB

continuously

WALTZ-16 modulated

DATA PROCESSING

Line broadening 3.0 Hz

FT size 32768

Total time 30 min

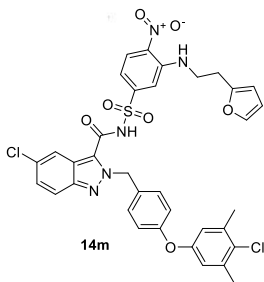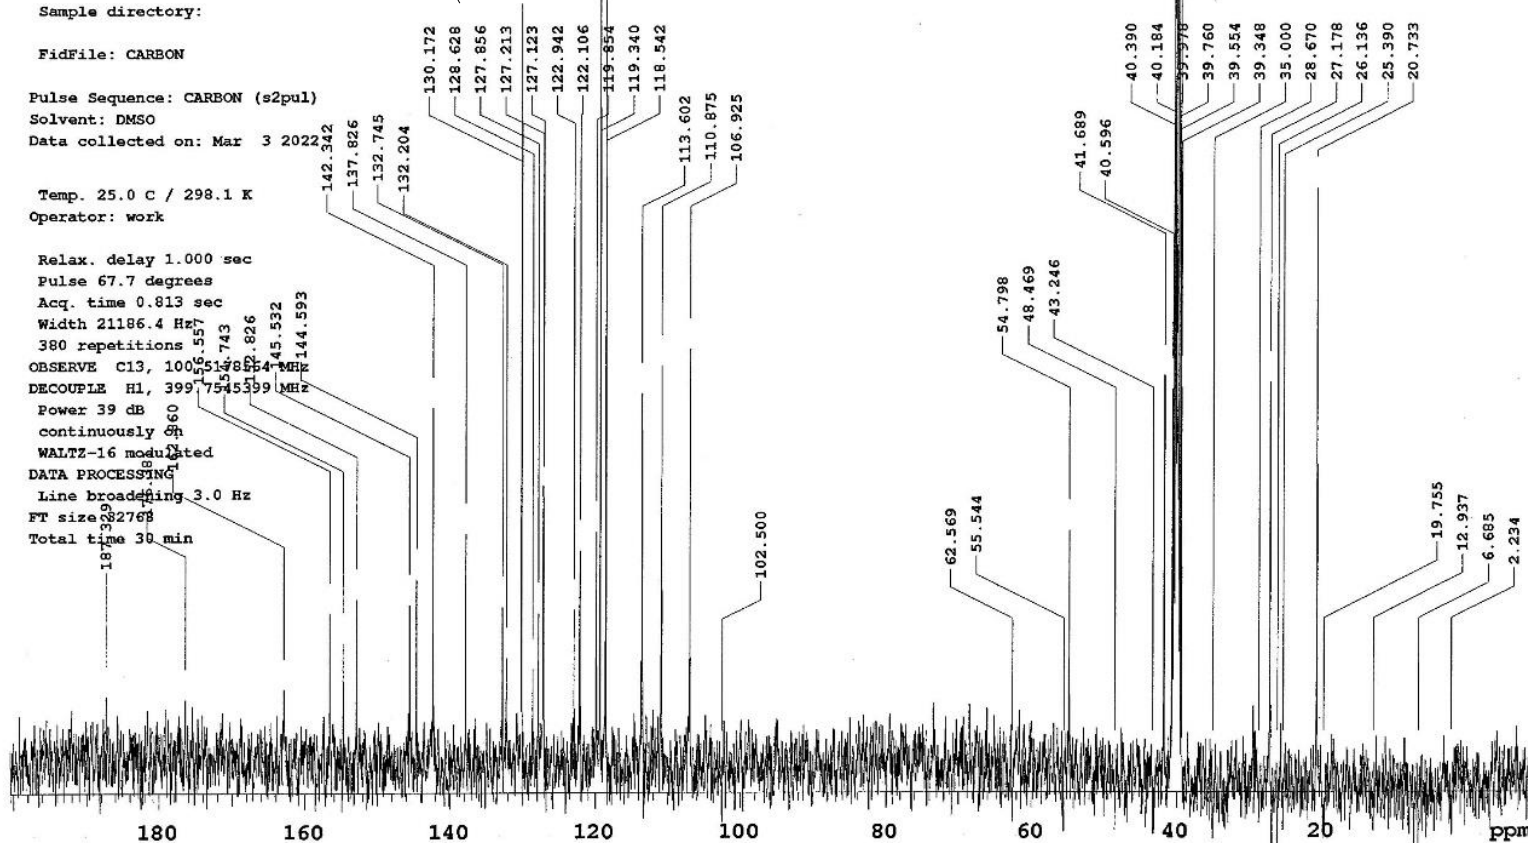

BD-4-122-1H

Sample Name:

Data Collected on:

400mr-vnmrs400

Archive directory:

Sample directory:

FidFile: PROTON

Pulse Sequence: PROTON (s2pul)

Solvent: dmsc

Data collected on: May 23 2019

Temp. 22.0 C / 295.1 K

Operator: work

Relax. delay 5.000 sec

Pulse 79.4 degrees

Acq. time 1.278 sec

Width 6410.3 Hz

20 repetitions

OBSERVE H1, 399.7525233 MHz

DATA PROCESSING

Line broadening 0.5 Hz

FT size 16384

Total time 3 min 21 sec

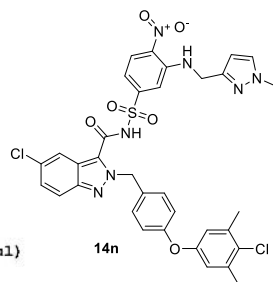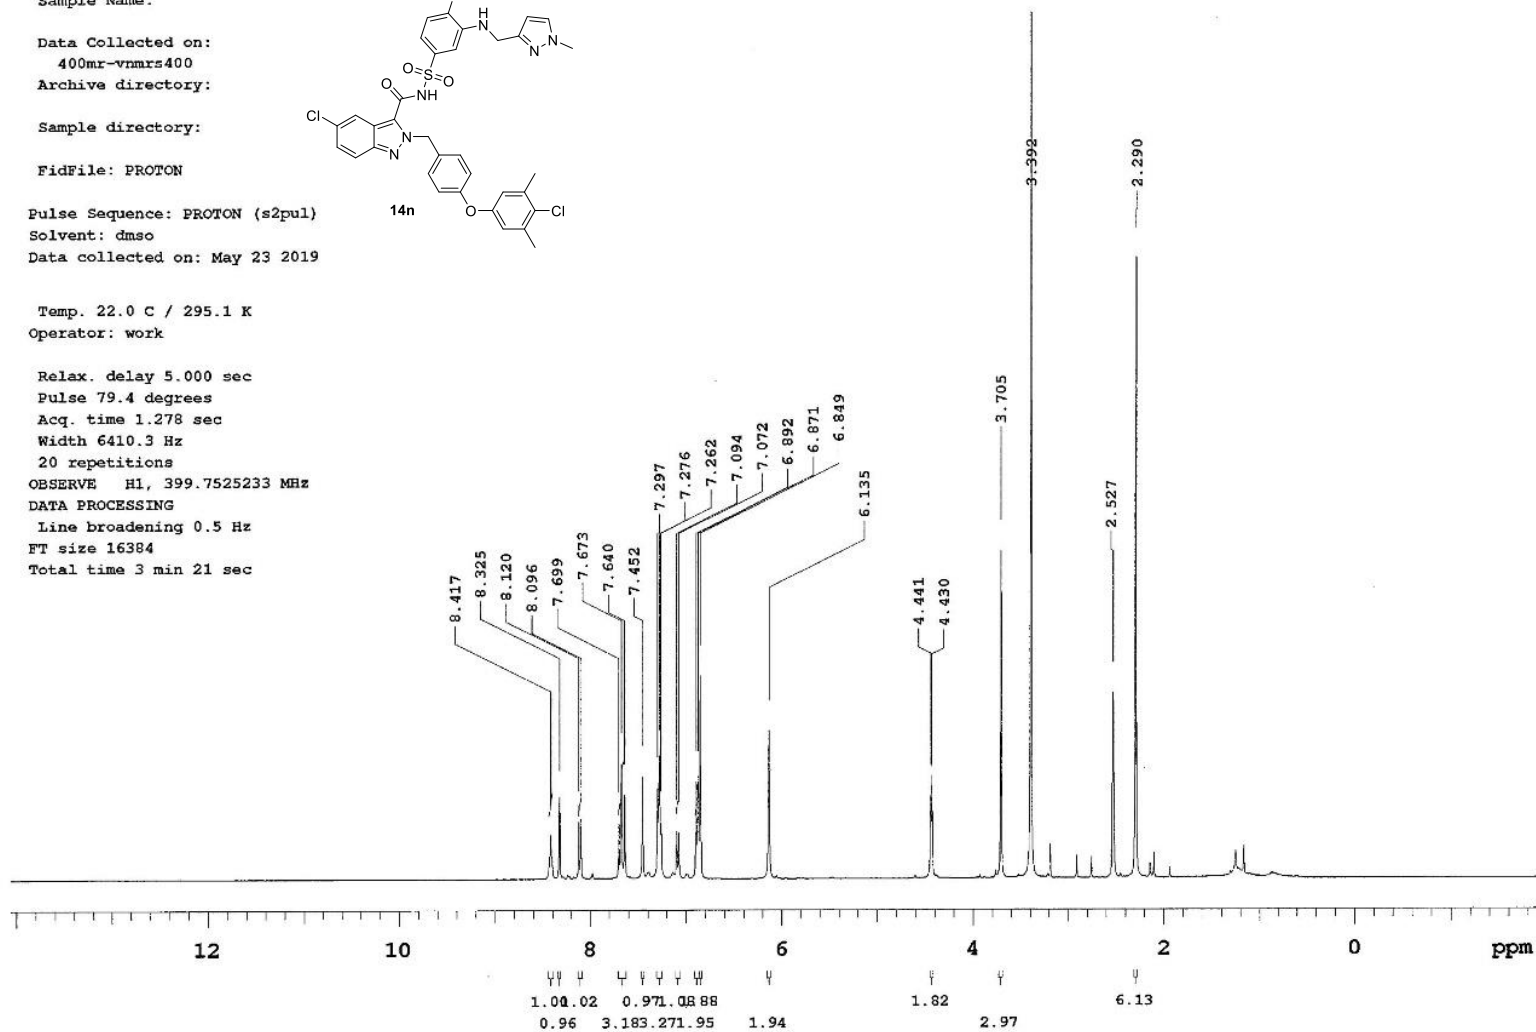

BD-4-122-13C

Sample Name:

Data Collected on:

400mr-vnmrs400

Archive directory:

Sample directory:

FidFile: CARBON

Pulse Sequence: CARBON (s2pul)

Solvent: dms0

Data collected on: May 23 2019

Temp. 22.0 C / 295.1 K

Operator: work

Relax. delay 1.000 sec

Pulse 87.1 degrees

Acq. time 0.813 sec

Width 24509.8 Hz

188 repetitions

OBSERVE C13, 100.5178564 MHz

DECOUPLE H1, 399.7545399 MHz

Power 42 dB

continuously on

WALTZ-16 modulated

DATA PROCESSING

Line broadening 3.0 Hz

FT size 32768

Total time 30 min

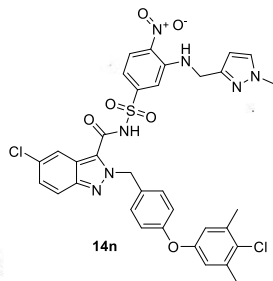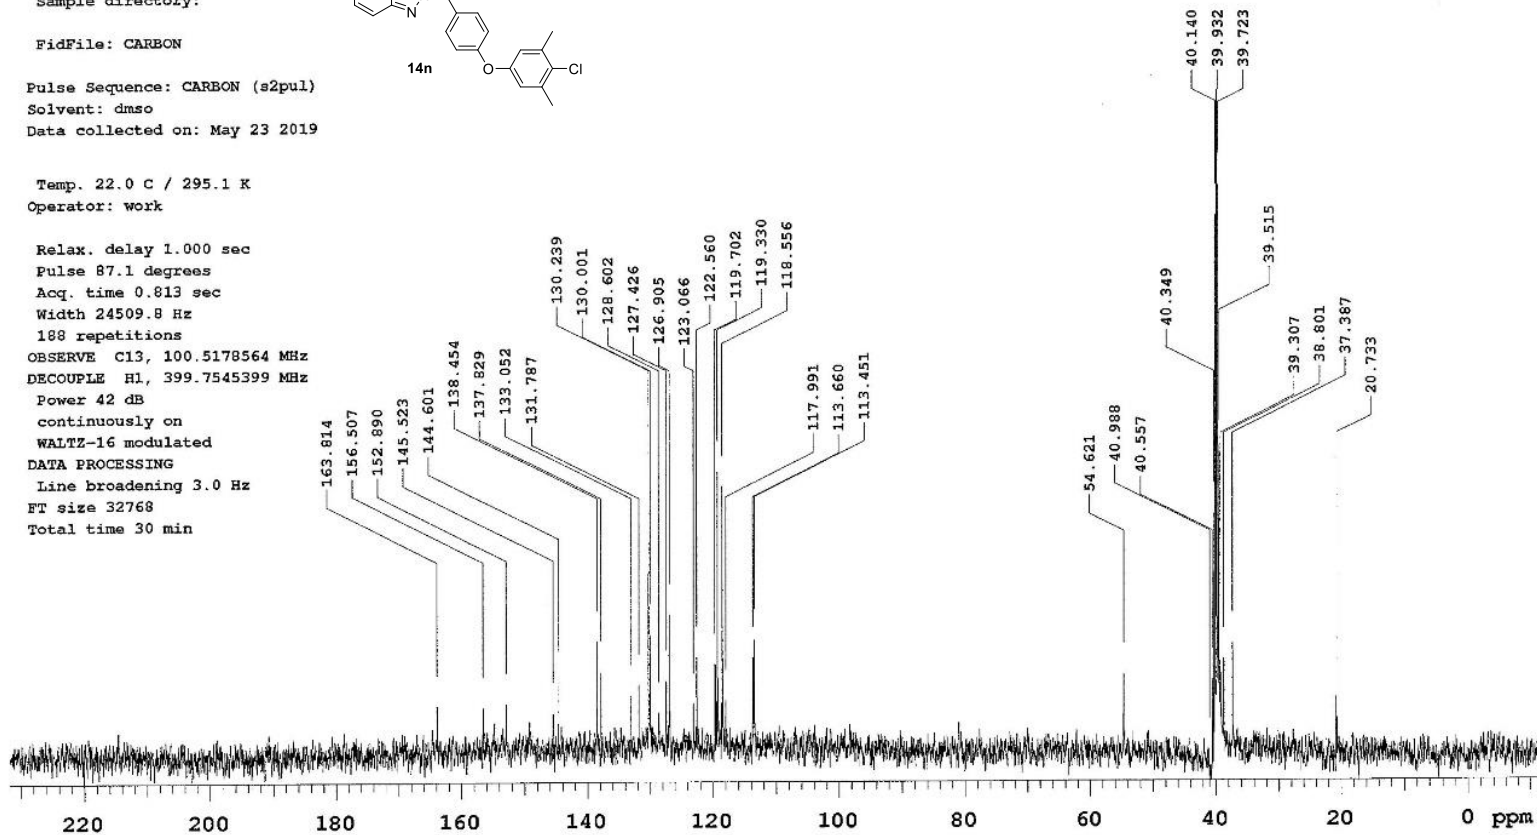

CG-1-018-1H

Sample Name:

Data Collected on:

400mr-vmars400

Archive directory:

Sample directory:

FidFile: PROTON

Pulse Sequence: PROTON (s2pul)

Solvent: dmsc

Data collected on: Oct 6 2019

Temp. 22.0 C / 295.1 K

Operator: work

Relax. delay 5.000 sec

Pulse 119.1 degrees

Acq. time 1.278 sec

Width 6410.3 Hz

12 repetitions

OBSERVE H1, 399.7525233 MHz

DATA PROCESSING

Line broadening 0.5 Hz

FT size 16384

Total time 3 min 21 sec

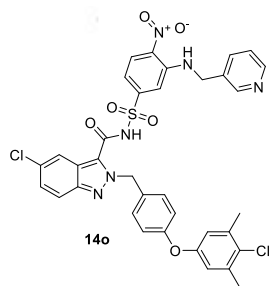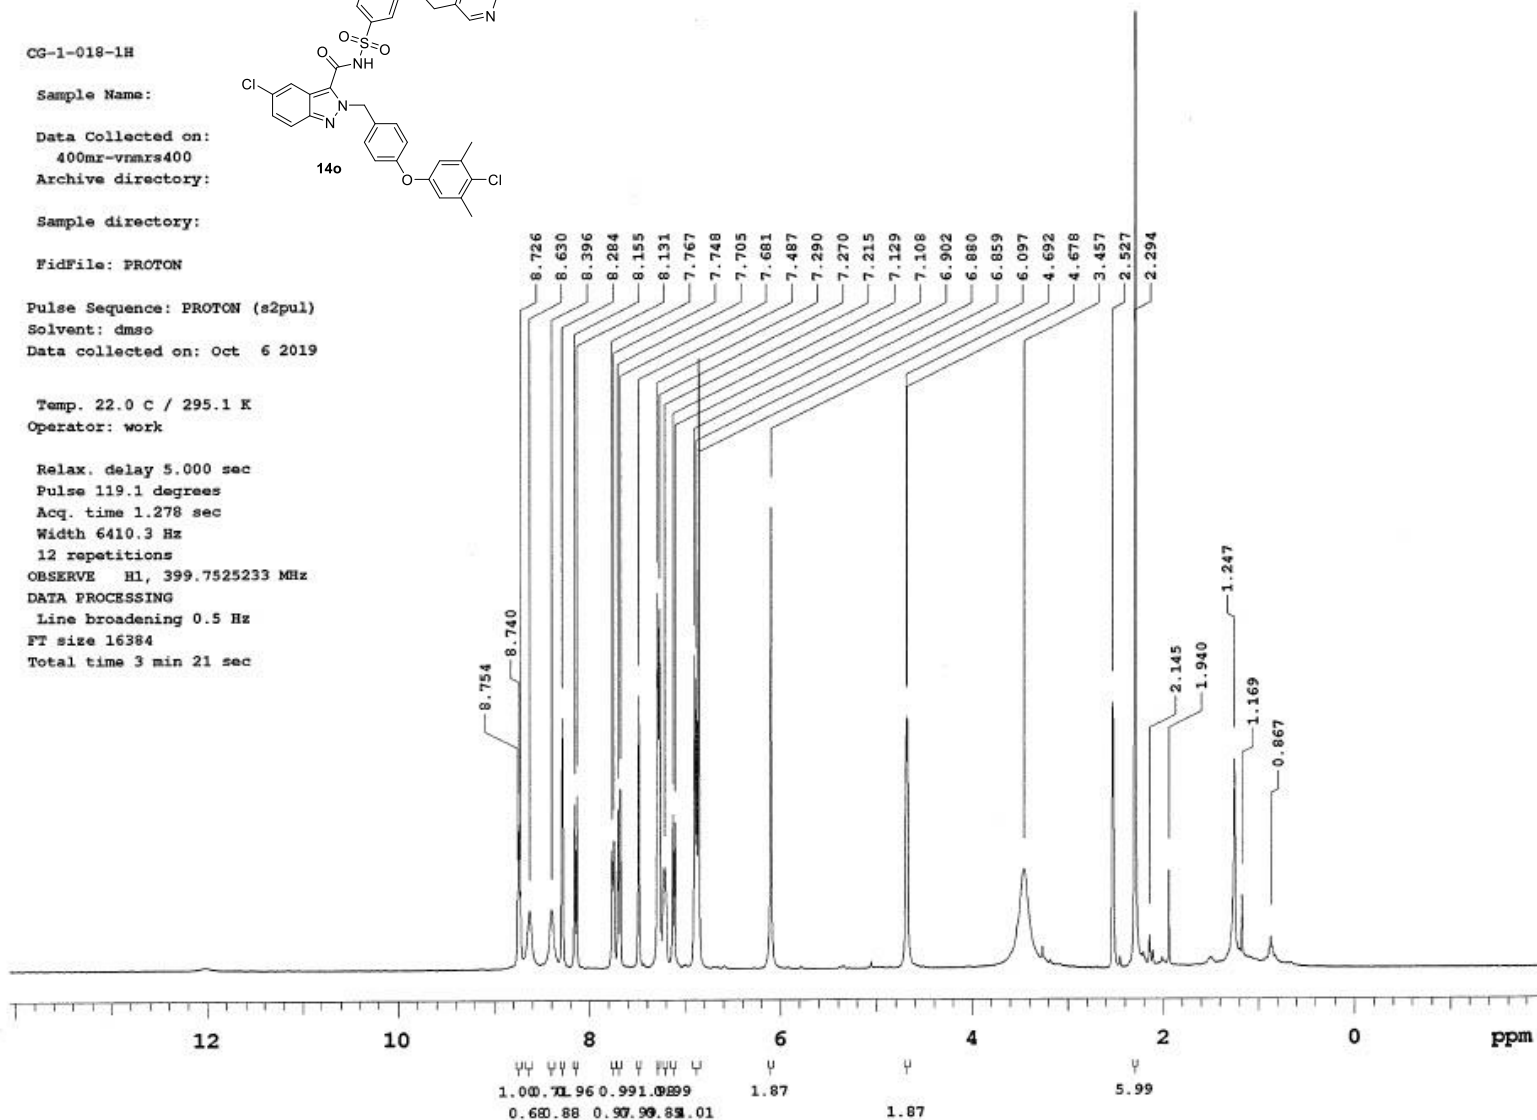

CG-1-018-13C

Sample Name:

Data Collected on:  
400mr-vnmrs400  
Archive directory:

Sample directory:

FidFile: CARBON

Pulse Sequence: CARBON (s2pul)  
Solvent: cdcl3  
Data collected on: Oct 6 2019

Temp. 22.0 C / 295.1 K  
Operator: work

Relax. delay 1.000 sec  
Pulse 87.1 degrees  
Acq. time 0.813 sec  
Width 24509.8 Hz  
248 repetitions

OBSERVE C13, 100.517329 MHz  
DECOUPLE H1, 399.752641 MHz

Power 42 dB  
continuously on  
WALTZ-16 modulated

DATA PROCESSING  
Line broadening 3.0 Hz  
FT size 32768  
Total time 30 min

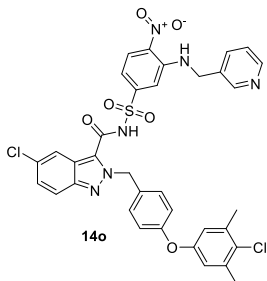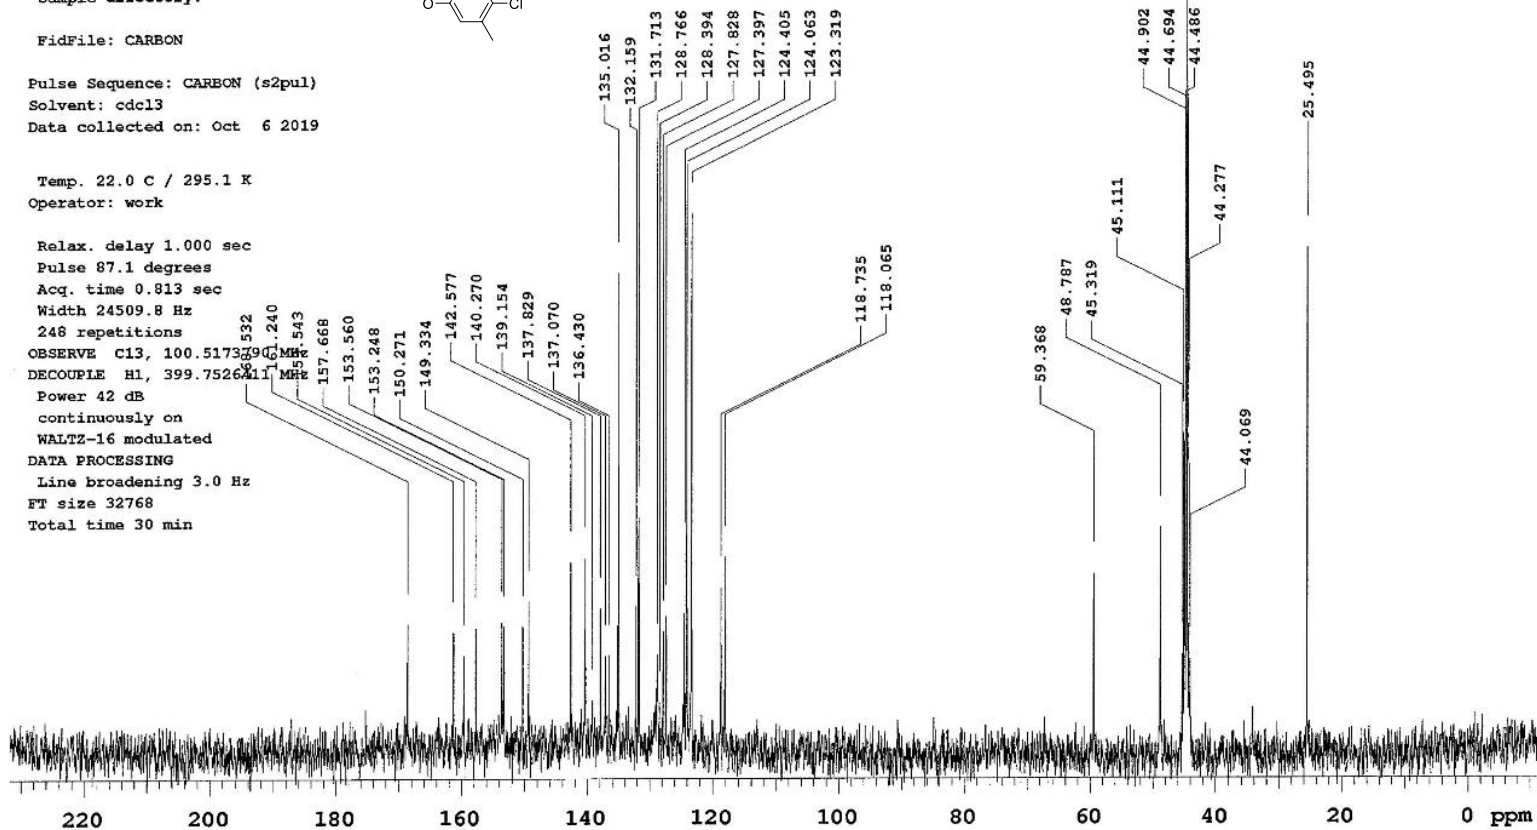



BD-4-126-1H

Sample Name:

Data Collected on:

400mr-vnmrs400

Archive directory:

Sample directory:

FidFile: PROTON

Pulse Sequence: PROTON (s2pul)

Solvent: dms0

Data collected on: May 30 2019

Temp. 22.0 C / 295.1 K

Operator: work

Relax. delay 5.000 sec

Pulse 79.4 degrees

Acq. time 1.278 sec

Width 6410.3 Hz

32 repetitions

OBSERVE H1, 399.7525233 MHz

DATA PROCESSING

Line broadening 0.5 Hz

FT size 16384

Total time 3 min 21 sec

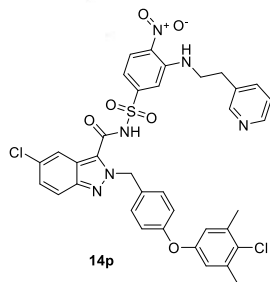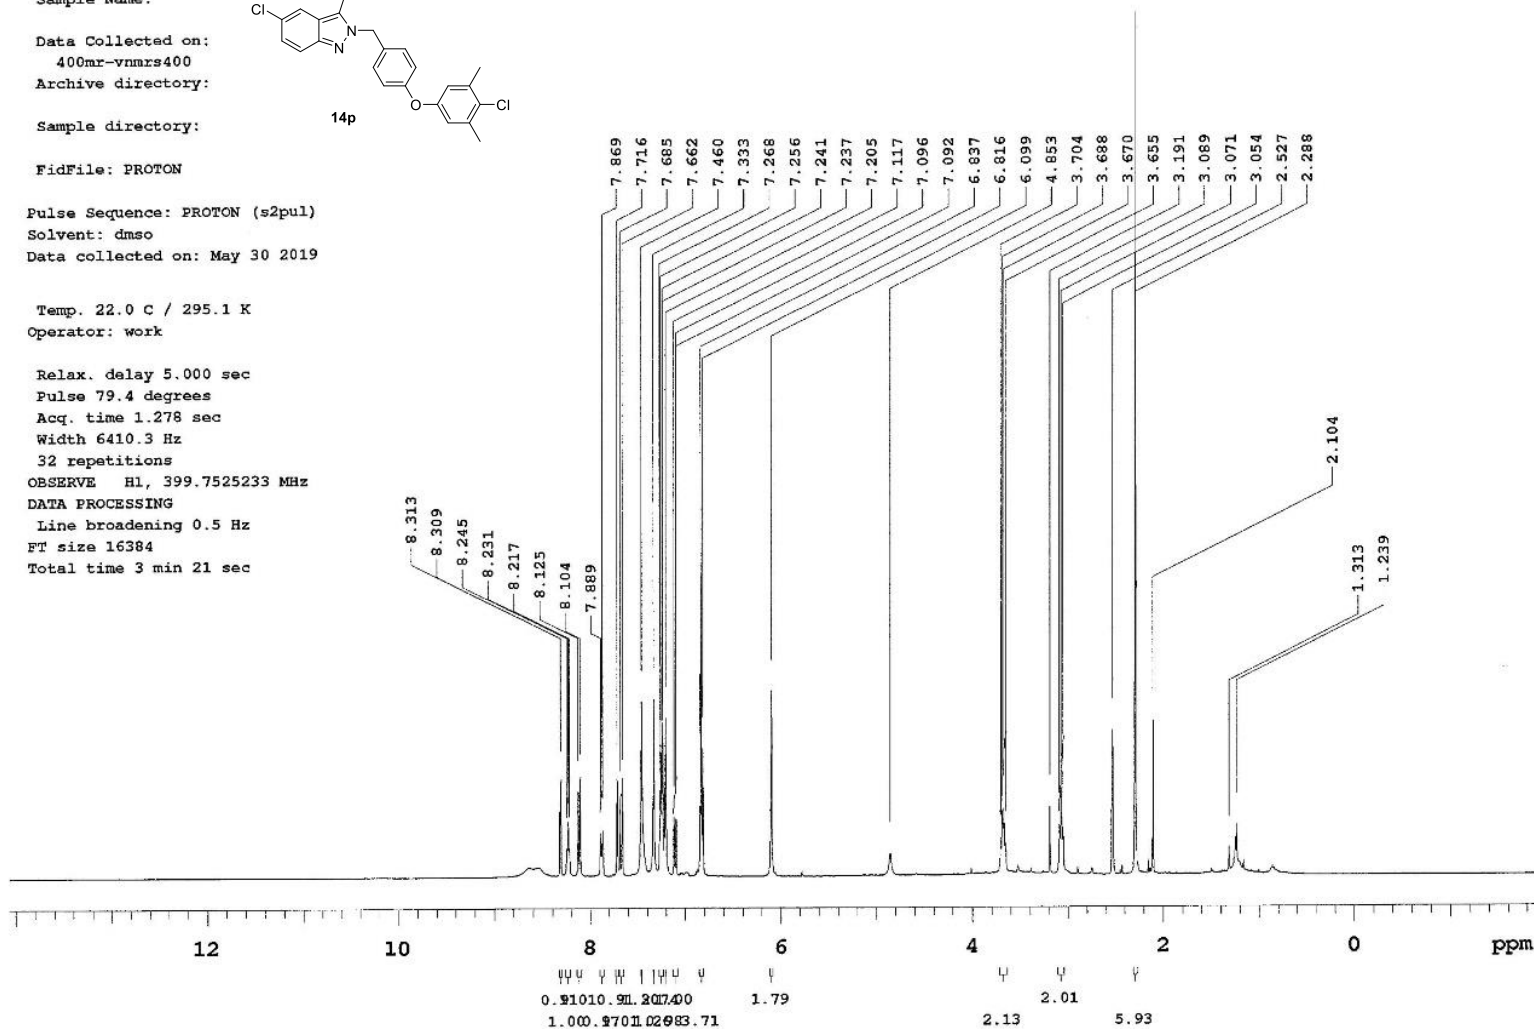

RR\_1005A-C13

Sample Name:

Data Collected on:

400mr-vnmrs400

Archive directory:

Sample directory:

FidFile: CARBON

Pulse Sequence: CARBON (s2pul)

Solvent: cdcl3

Data collected on: May 30 2019

Temp. 22.0 C / 295.1 K

Operator: work

Relax. delay 1.000 sec

Pulse 87.1 degrees

Acq. time 0.813 sec

Width 24509.8 Hz

208 repetitions

OBSERVE C13, 100.517006

DECOUPLE H1, 399.7524482

Power 42 dB

continuously on

WALTZ-16 modulated

DATA PROCESSING

Line broadening 3.0 Hz

FT size 32768

Total time 30 min

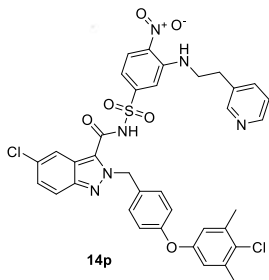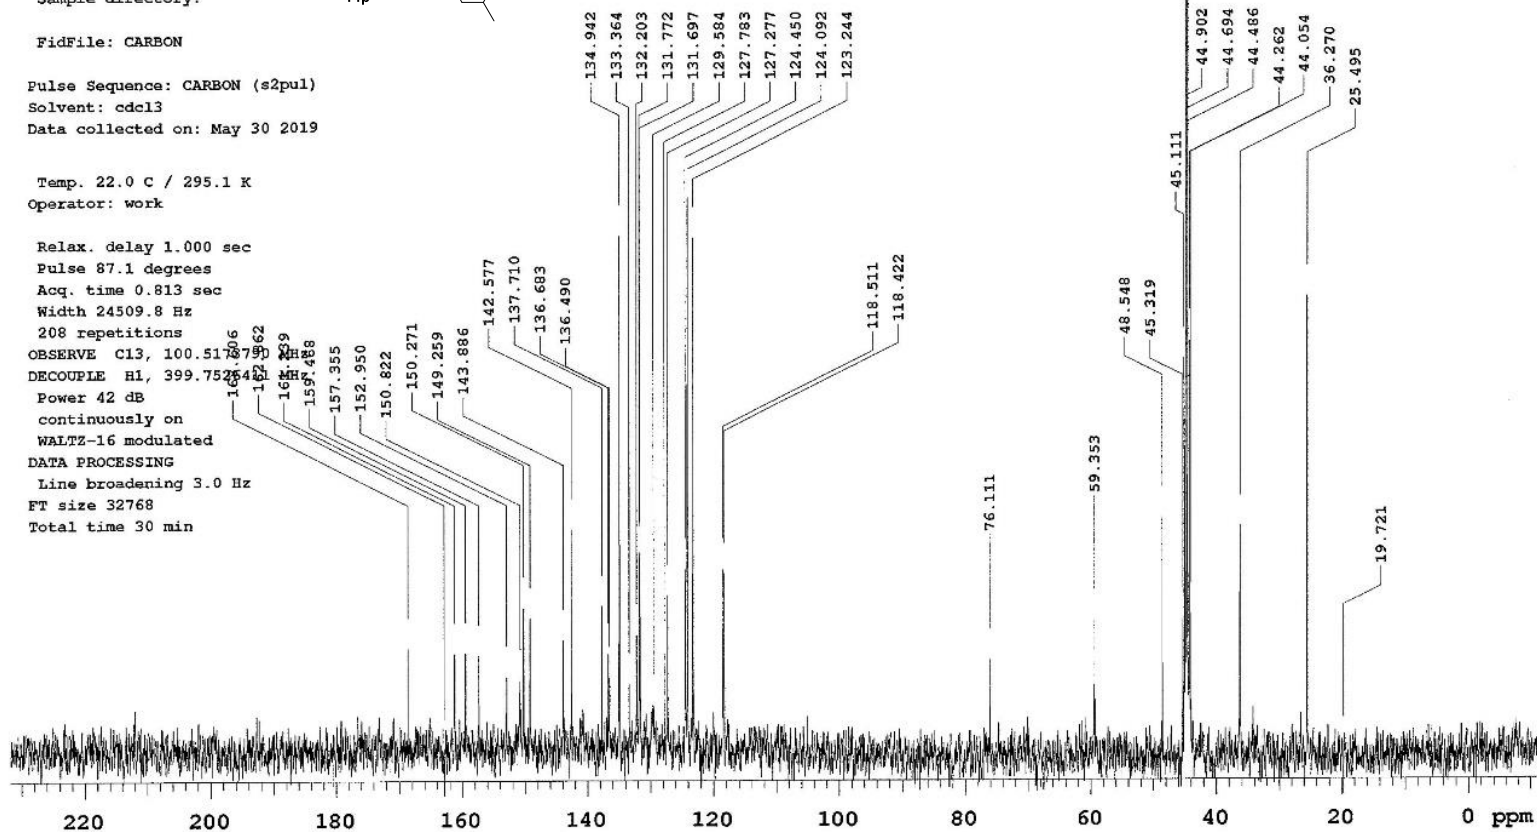

ED-4-103-1H

Sample Name:

Data Collected on:

400mr-vnmrs400

Archive directory:

Sample directory:

FidFile: PROTON

Pulse Sequence: PROTON (s2pul)

Solvent: dms0

Data collected on: May 7 2019

Temp. 22.0 C / 295.1 K

Operator: work

Relax. delay 5.000 sec

Pulse 79.4 degrees

Acq. time 1.278 sec

Width 6410.3 Hz

28 repetitions

OBSERVE H1, 399.7525233 MHz

DATA PROCESSING

Line broadening 0.5 Hz

FT size 16384

Total time 3 min 21 sec

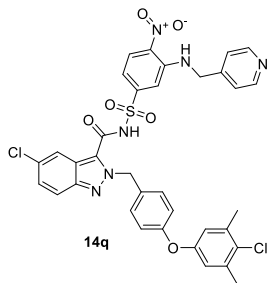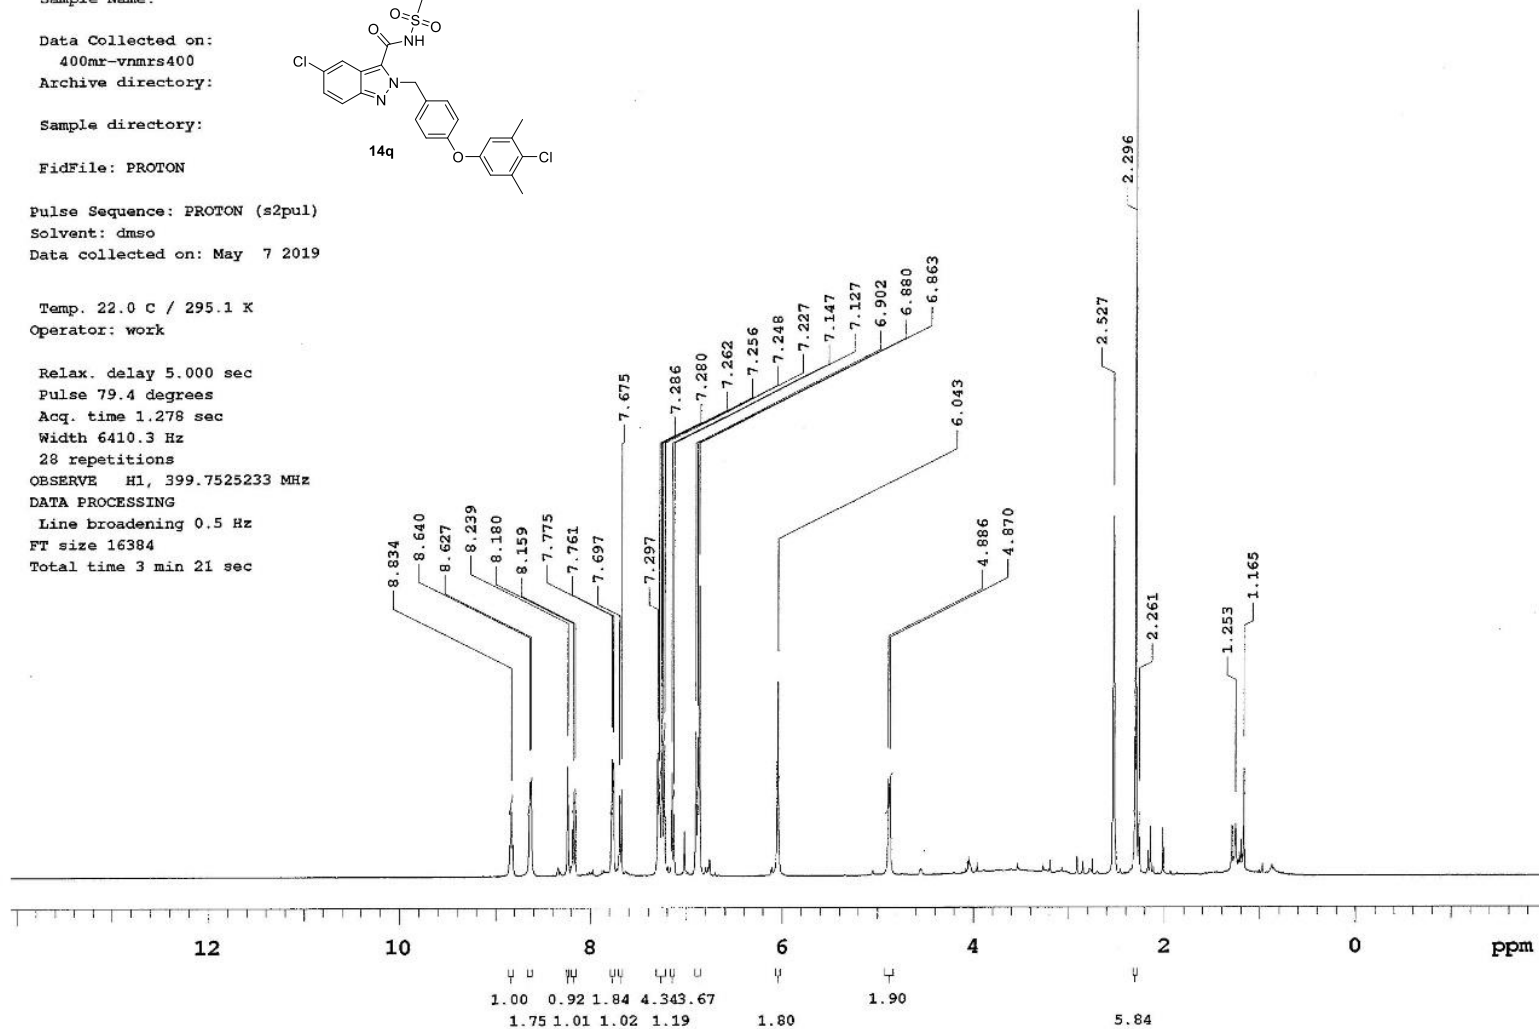

BD-4-103-13C

Sample Name:

Data Collected on:

400mr-vmms400

Archive directory:

Sample directory:

FidFile: CARBON

Pulse Sequence: CARBON (s2pul)

Solvent: cdcl3

Data collected on: May 7 2019

Temp. 22.0 C / 295.1 K

Operator: work

Relax. delay 1.000 sec

Pulse 87.1 degrees

Acq. time 0.813 sec

Width 24509.8 Hz

292 repetitions

OBSERVE c13, 100.5173790 MHz

DECOUPLE H1, 399.7526411 MHz

Power 42 dB

continuously on

WALTZ-16 modulated

DATA PROCESSING

Line broadening 3.0 Hz

FT size 32768

Total time 30 min

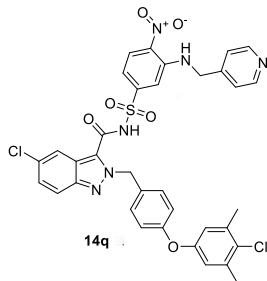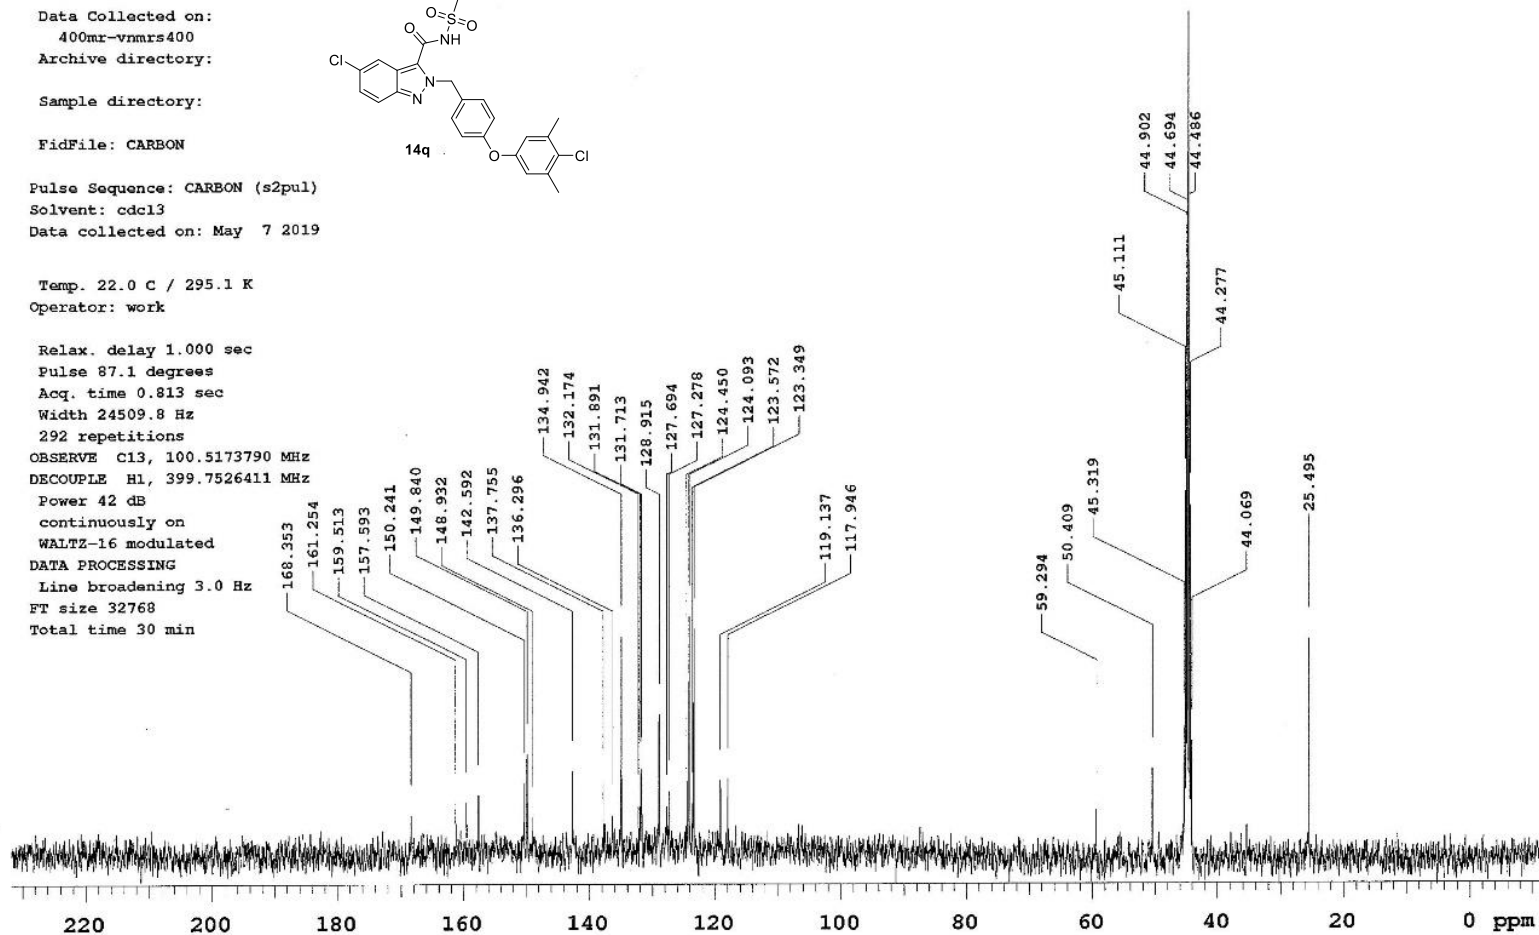



BD-4-109-13C

Sample Name:

Data Collected on:

400mr-vnmrs400

Archive directory:

Sample directory:

FidFile: CARBON

Pulse Sequence: CARBON (s2pul)

Solvent: cdcl3

Data collected on: Aug 8 2019

Temp. 22.0 C / 295.15 K  
Operator: work

Relax. delay 1.000 sec  
Pulse 87.1 degrees  
Acq. time 0.813 sec  
Width 21186.4 Hz  
216 repetitions

OBSERVE C13 @ 100.5173790 MHz  
DECOUPLE H1 @ 339.3526411 MHz  
Power 42 dB  
continuously on  
WALTZ-16 Modulated

DATA PROCESSING

Line broadening 3.0 Hz  
FT size 32768  
Total time 30 min

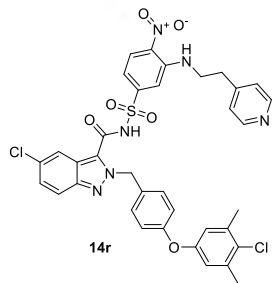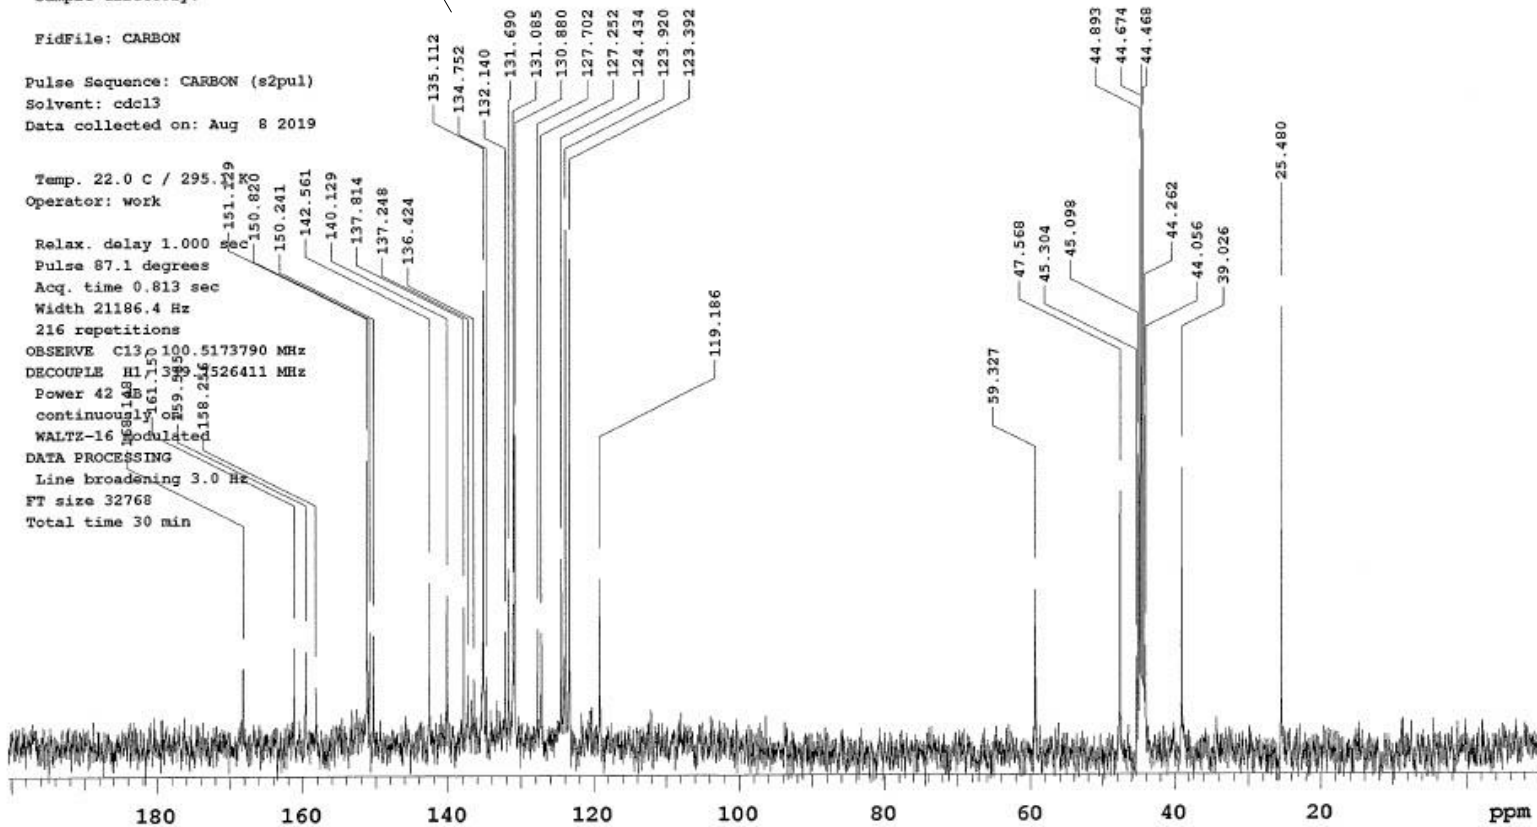

Supplement: d2md00095d2.pdf [file d2md00095d2.pdf]
